# Supplementary material
Source: Research Square preprint supplement (doi:10.21203/rs.3.rs-9633629/v1)
Supplement: Supplementary file 1 [file 593a9fb5a95803f770661126.xlsx]

## Sheet: GSE95849
	GSM2527022	GSM2527023	GSM2527024	GSM2527025	GSM2527026	GSM2527027	GSM2527028	GSM2527029	GSM2527030	GSM2527031	GSM2527032	GSM2527033
HLA-C|HLA-B|HLA-H	18.3131280010568	18.8612913439028	18.6680368969291	18.7402860817485	18.2869977416752	17.9022939664966	18.4692111644897	18.4136244700291	18.6174725010292	17.9775921448991	18.2210097705674	18.1578190008397
HBB	17.4144148331343	14.4763780223178	18.4450351958815	18.6859300374663	17.9404981811275	17.5276574767404	18.2006768862543	18.1970917815639	19.0977695892734	18.8278588702478	18.6455442381013	17.2191317188635
FTH1P3|FTH1	18.3818507478432	18.2016532369938	18.9182	18.4665819300529	18.0953710697702	17.7108949094406	18.1508243952529	18.1489399760137	18.0429094540584	17.5828099020814	17.662679622888	17.8682963844531
ACTB|LOC644936|POTEF	18.2419509258442	18.3474095847788	18.2207183664314	18.4326692042737	18.6276021008848	17.3227002583883	18.2405615058945	17.7964207730653	17.7682725523372	17.581718690349	17.5770406775525	17.8670038651083
TPT1	17.8384683649119	18.0855748706904	18.2635825035143	18.1172532370981	18.160695077757	17.5567862853052	18.4981538501248	18.0912842842882	18.5678333697652	18.0596795018267	18.1164276397939	17.9910532140565
HBA1	16.7736164421437	13.8481298832212	18.9429909211138	19.0102463918815	16.8735496900797	17.6464426684648	17.3596473426428	18.1547963646503	18.5462744940144	18.702130716312	18.3567587596178	15.8526214743805
RPS29	17.6703264528559	17.7995027051103	17.8781323626667	17.4864729372755	17.8796402971332	17.4788940996301	18.5260905527861	18.1129305036984	18.4182926672964	17.8706579991093	18.1890978164479	17.8829588890884
B2M	17.5442048942155	17.8171342557905	18.0139867221578	17.9509905548454	17.9544465822239	17.3772354341205	18.0641552411062	18.0584362270828	17.6176637447901	17.5602129649217	17.8846421171855	17.6341051024468
CD74	17.638090092276	17.9896541243339	17.2735820078366	18.2308167411717	17.6610753934565	17.3956627360661	18.2083305878363	17.8760602298853	16.8928401224912	17.0853035120985	17.3927008812012	17.7389999366949
FTL	17.8908821174115	18.1138974764891	18.7111224012138	18.3045639715008	17.3518953784542	17.3026155622621	17.9025894835648	17.5222750279092	17.1026551606537	16.8811335289106	17.1992475715134	17.4137386860251
HBA1|HBA2	16.4990435338499	13.4887209152031	19.0162688535406	18.8398512236658	16.1801462698702	17.329729148207	16.7525088237904	18.0324473237413	18.0566880857957	18.3911178185259	17.9169107847243	15.3135643670843
HBA2|HBA1	16.1133662511975	13.2115900149478	19.1934299898822	18.7197463003969	15.830093772612	17.7146450272832	16.1820209124833	17.904525887461	17.3110708258511	18.2996690417891	17.6277685256211	15.5550963112157
LCN1	16.9811430053287	17.1742812242364	18.184775125805	18.1801510106992	17.7050390852797	17.408998027531	17.9402917494887	18.0054195872749	17.5007538770803	17.3509433421649	17.6187	17.3542088891001
RPS28	17.6955876112145	17.8319363989188	17.5502761556069	17.2868933671883	17.157539722661	17.5907024690878	18.2362793695643	17.7513623188785	17.3619455260578	17.1255867699511	17.4261402115408	17.3908
RPS16	17.339389941781	17.5809926873456	17.2687961838287	17.2129047841474	17.3919287513282	17.2984500197506	18.1940371291389	17.8719344446727	17.7264321976885	17.4525640745792	17.541244758575	17.6068932528553
RPL36	17.2573737749846	17.2249849365055	17.9269172118054	17.5225191360728	17.8665177639549	17.2048774637783	17.959746946616	17.8374642644738	17.8980424957981	17.4054263408467	17.8190220304335	17.3670422054472
PPP1R18	16.7589638803854	16.9747235035186	17.9640562218819	18.4418039349515	17.4353401130868	17.0866064562266	17.6158432748083	17.8142839704831	17.0889209857656	16.9905172398461	17.229692363782	17.2204131503945
RPS27	17.2774703111275	17.443737750524	17.5367781524076	16.5812582097077	16.9330719845682	17.5576432457358	17.9950402220658	17.8007876455749	17.3711171641339	17.1305880936637	17.3489739140373	17.5008936251392
EEF1A1	16.6990442897325	17.261228844574	17.3279833577486	17.0673858807499	16.3759044418702	17.8882703125857	17.5930675393822	17.8552634721402	17.1696691678823	16.990038750963	17.5898248441534	17.744230069992
RPS11	17.2697915063136	17.5662508682175	17.6134632373616	17.142304264345	16.7806409330171	17.472655821609	17.787503436165	17.8719666184949	17.3526006489888	17.0428974373345	17.5434662275772	17.4154806431622
RPS3A	17.0051218800276	17.0776190829763	17.0337332179532	17.0356987771885	17.3618235898207	17.1584134668071	18.1911091080937	17.5778961994137	17.6978514248617	17.5397923696204	17.5948130077478	17.5984404449762
S100A9	17.9762960582811	18.0850141850807	17.9705970373351	18.4542878947866	16.8959000095973	16.0808436795492	16.3140417626124	16.9497786489948	15.6169995854074	15.5159457489735	16.4644962364496	16.3125629841736
RPS2|RPS2P32	17.3629172686511	17.4511331679662	17.4296000798701	16.8888923080337	16.8589953928772	17.4317003881969	17.9244298585271	17.6033281013134	17.136140868887	16.9062901731198	17.0921376438486	17.456425437853
RPL19|RPL19P12	16.9021166850334	16.955848886382	17.0293630365731	17.1797686089077	17.3931657143767	16.9977478282718	17.9998604335934	17.6213698610277	17.5456655687062	17.3688183299457	17.446483725371	17.3147577629295
HLA-A|HLA-H	17.5790550988421	17.6758656745659	18.0474083471782	17.3327989871874	16.1375424928163	17.3676507696743	17.4930193910864	17.6555198971724	16.5464515443191	16.2511885761947	17.1337822101437	16.4881132487781
RPSA|RPSAP58|RPSAP9|RPSAP52	17.2500789478504	17.1569843763608	16.8931733966232	16.579788700611	17.2432645787077	17.2828396917605	17.9689729228375	17.6053260007292	17.6415453722018	17.289566265599	17.1515074451201	17.2982272652257
TMSB4X	17.2721922431579	17.0979122386963	17.7736777840321	17.5994794762103	17.1004380573468	17.0194717193507	16.8056971311479	17.2283796386445	16.456889172552	16.1492886030356	16.5607666920472	16.6553480268628
RPL6	17.1664614355635	17.1610605467628	16.8108671496093	17.1030313783443	17.273766829514	16.9914483431957	17.902277251439	17.4690460547575	17.417508595491	17.2445801562564	17.1275869664238	17.2333960619198
TMSB10	17.3474449869683	17.4547712904416	16.6543981183338	17.3040648515497	17.0263694152771	17.043644333223	17.8472898898432	17.2212163710855	17.080529667577	16.6347796992852	17.0798117198772	16.8932414836876
S100A8	17.9575022321014	17.9277760972654	17.3672778402539	18.4128380498288	17.6609397608577	15.2375215550592	16.2277712372214	16.1234316181913	15.0711661615083	15.1608094558031	15.3619621440676	15.7535498731763
RPL39	16.9648557367599	17.2195063789956	16.848998526949	17.1049908255087	17.0760499202034	17.1606777996543	17.8324137137011	17.5662	17.3731515944049	17.0429406883112	17.2081987249786	17.0476578556963
RPS27A	17.0492075338132	17.179817888751	16.9181176436676	16.4712550305071	17.1203255772566	17.2462756106375	17.941062045946	17.5233064457208	17.3873	17.1856636675393	17.0344928828242	17.3132425590185
RPS14	17.2012329498628	17.3237077829227	17.4880283203646	16.6692750595728	16.6148697649088	17.3433755304332	17.7085290912353	17.4574073409583	17.2383863836234	16.9703585929516	16.8119727508279	17.1997178864638
APOBEC3A|LAIR1	17.3993169157399	17.3057345923305	17.3283459590714	17.4654728655713	16.6879202603572	16.7794216159813	16.6676833176504	17.2644483567003	17.4241196600217	17.2569255900108	17.2826901077909	17.1958053940257
RPLP2	17.0873759696719	17.2297115306833	17.0757909939177	16.5940226346128	16.819777375193	17.1200357102743	17.7022056294849	17.4686241471176	17.1760277052261	16.8259333376404	17.0874175771022	17.1870778850172
RPL21|RPL21P28|RPL21P44	17.0193090765097	17.1632363936142	17.028651978822	16.3508750761263	17.0156807797885	17.1498595786211	17.7970892518231	17.4976933880837	17.3296590244889	17.061319882867	17.0335366131701	17.2033207208416
RPS17|RPS17L	16.8855097967204	17.0103612048525	16.9858082868428	16.6856106793247	16.9051	17.0447484459247	17.7376386603352	17.2173554820862	17.2243472791142	16.9868647449441	17.1306490307418	17.1233593984358
RPL35A	17.0605522639627	17.0190289577872	17.0537714439071	16.457484736102	16.7775255100608	17.0151715705197	17.7555488831981	17.2641133443043	17.259630078001	16.9371410820103	16.7584732191634	17.0721746839039
LCNL1	16.3721021675683	16.6024426376313	17.6415930249186	17.7035334738614	17.4467928647881	16.966827208305	17.4856837947159	17.6161868359709	16.8316885386075	16.7679437879089	16.8916854352548	17.1698061446411
RPLP1	16.8658581228865	17.2219992120358	16.9527421604715	16.6518979188059	16.2917733593457	17.2633473784739	17.3465590910908	17.5120852505072	17.0279948440788	16.5857060582579	17.0229197344555	17.121748996939
RPS18	16.755644774373	17.0892259518846	17.1497837926307	16.2422066951929	16.4576200802494	17.283331189447	17.5199064526184	17.439224944441	17.0031893396376	16.9755795676934	16.6941695442374	17.2533457665772
RPL28	16.9339711133105	17.1341366460858	17.1471142149458	16.5051971273465	16.1858810298216	17.1822135929634	17.2954286438262	17.3658659555476	16.7199942102786	16.5198489694175	16.6848696292267	17.0366715247698
JUND	17.3236280879456	17.4845792254098	17.4181052469802	15.6654550900666	15.3819829148667	16.9572102623095	17.701160984905	17.6176906156419	17.3406845830909	16.9985084318672	17.084315802207	17.0680294369021
RPL9	16.7156031360819	16.7490256554684	16.5906949964159	16.3731500225486	16.8853570377446	16.5788042516005	17.7385095443933	17.2230336474442	17.3003998640186	17.0001726569475	16.9084211933776	17.1083457453787
PTMA	16.7294001698023	16.9734559415178	16.522286591924	16.2691253719257	16.4861052409684	17.0905232273164	17.3898744862153	17.1980399594661	16.5163418186704	16.6828126091123	16.5974103117129	16.9112873270932
RPS15A	16.3926601152336	16.5947505683958	16.7679210569954	15.9936947278213	16.5839520270577	16.9688828235721	17.5084414723095	17.2764410789816	16.9895262348885	16.8459028249062	16.972367327141	17.0968576660802
RPL21|RPL21P28	16.6865561564271	16.6303428275526	16.6284622408533	16.4414706381002	16.5229788629797	16.7258652656187	17.4904737131383	17.2257552766183	17.1702001180984	16.5969245138771	16.9048106663347	16.9556321438731
TGFBR3L	16.2110283668187	16.7863032974582	17.4464427613845	17.5363903729946	16.9168225021393	16.6850822256185	17.1715719929269	17.2706524332566	16.657284203313	16.4666622855849	16.7573320277068	16.9053936665606
RPL10A	16.6369720542867	16.5739178869202	16.5813985383916	16.1224121263481	16.6211379352485	16.810370011853	17.602212481592	17.2451611529374	17.1525528367631	16.7440667657422	16.912731378479	17.0140829906142
S100A4	17.5881230261641	17.392967767838	15.9624700305194	17.610126185596	16.8998625789285	16.1255575796164	17.2873001471951	16.6457088951773	16.3264169184367	15.8686995429021	16.2956112834698	16.1621380280157
HBB|HBD	14.6764986016492	11.4873010549119	18.7776267112626	18.0450162285621	13.9732324652523	17.0037899751023	14.9055890170721	16.9942138458246	15.7998903620452	16.7830927726593	16.5283227799793	14.0995604977186
RPL13AP20|RPL13A|RPL13AP5	16.7019935375341	16.9377210085231	17.3010679545898	15.9368122571886	15.8074798266081	17.2350179072753	16.9388763444959	17.2245127005803	16.2063097398286	16.2668394115864	16.3917569439023	16.8456396811412
LOC100508408|RPS13	16.2285555217367	16.4583180483837	16.2946633616445	16.3472328866488	16.6503209314912	16.7418265883056	17.6711272103715	17.165736806055	16.7653791730714	16.6135320644173	16.5708895378304	16.9712590148277
CEP135	17.0115129014249	16.8238537540812	16.8318621196248	16.9741397862937	16.4832808052936	16.4779085044715	16.3057239840553	16.9703402690624	16.9139816315321	16.9161069230244	16.8056059216958	16.8844384948604
RPL13	16.4350044265962	16.6772922801311	16.8753862937924	15.8420431796248	15.7811580246469	17.1737745188353	17.0739451092857	17.1803168968737	16.7549717169241	16.4288551274131	16.997438558495	16.9710993218008
PFN1	17.1036565215214	17.1564880069348	16.628213766415	17.5401837962994	16.8039744862302	16.2557116881961	17.0084776492325	16.7396824256563	16.0396779155528	15.971409628966	16.1284919099503	16.2886701958807
RPS6	16.0931045324587	16.4089117720932	16.3794733498298	15.8478204619286	16.1862849763436	17.0054562914764	17.2852049709475	17.2651834772452	16.4623850832141	16.6004259360136	16.5174298715576	17.0130491976444
EEF1G	17.0048128246553	17.0703780169576	16.7018539526225	16.4398065319677	16.5223390773092	16.968536741631	17.3214746745133	16.8791426803249	16.7392841180872	16.4218874801511	16.400523129744	16.758399382534
H3F3A|H3F3AP4	16.9369856850431	16.9318159576161	17.2198485286337	17.3359579700713	16.8742184088182	16.1710535189109	16.7095421296453	16.750794357478	15.7980126058768	15.7437626032266	15.8736260276492	16.045623053354
CST2|CST1|CST4	16.3592253431948	16.5398498875498	16.700007458555	17.5655549794332	16.6211379352485	16.4679824335856	17.1031634884422	17.1015402933239	16.5979228953868	16.3639661673552	16.5501169101648	16.8792624291894
HLA-C	16.3483821684582	16.7517146564252	17.4867751462772	17.2372150406582	15.7649149613629	17.0241842924295	16.8595695345418	16.615505425888	16.1303404862412	15.7794346655986	15.9573	16.1547232588199
RPL18A	16.1343109160463	16.5256886592903	16.600204094466	16.2292728060913	15.5313975402621	17.0117665095599	16.9659264067923	17.3624120143589	16.2675217228971	16.1733404513926	16.6637431586242	16.8463247483611
HLA-DRA	16.6523634015676	17.1708875580802	15.9341911244476	16.9495391334395	16.0311370900588	16.4520794884257	16.8626540582359	16.7018351204007	15.117613498892	15.4883877903783	15.6264554804901	16.494430947064
UBC|UBA52	16.3573559434934	16.8554753442858	17.0793095332781	16.0547066438533	15.8030616922501	16.9972497898742	16.9109921458957	17.0430572333079	16.0704665201834	16.3303992709317	16.5506401299095	16.8864608320225
RPL27	16.2900872854599	16.5283958612039	16.3335543285783	15.791168048043	16.0825022117752	16.8183314115357	17.2002687823701	16.9969602599085	16.3903121014075	16.3750028816024	16.3296345945068	16.6800092705707
RPL11	16.0130729240546	16.1686719630206	16.3962163109384	15.9593234451526	15.9639329416724	16.7902950705801	17.2052890836593	17.1329757003037	16.7176092141543	16.5106522657183	16.4977777603664	16.935835655043
RPL18	16.3245133242034	16.6091510552417	16.7646090354738	15.9923299616107	15.7015957287844	17.1196278952165	17.1029099019251	17.1727014024889	16.339193098544	16.1303757771792	16.593023900542	16.8266
RPL38	16.2316562262186	15.6948465288331	16.1146555201864	16.4530882386425	16.5985127085703	16.3415793658259	17.408686760957	16.6760609571442	16.8254283663506	16.5669094950366	16.629381054723	16.6234729542852
TSC22D3	16.9576736406721	17.3525532703043	16.7749879971955	16.005980662683	15.0330846620114	16.4451312790918	17.0475652353132	17.188904349558	16.6413667312365	16.1231798485895	16.7243024720468	16.1515042698811
SH3BGRL3	16.9943502533348	16.8885124615331	16.8564424825271	17.0720823887278	16.2511503237933	16.1228602713112	16.3741266149323	16.3416569089946	15.5989879140138	15.5636744426761	15.6702348116411	16.0214799035207
OAZ1	16.944879166057	16.7929134434282	15.9620027423678	17.4608235146426	17.0360235462163	15.8778870512695	16.2794107830077	15.9254371115909	15.5298489625742	15.2192367877784	15.0252931359661	15.6821389998331
CST4|CST1|CST2	16.0401824435671	16.2253616737925	16.8224167783352	17.3948051232167	16.3394185199514	16.1739688965558	16.8516711458327	17.0448753910395	16.033974066356	16.0513693385509	16.2524757841157	16.5917365801979
TH	15.7335283453047	16.1051303772964	17.1568190632624	17.2250850047394	16.4839710034537	16.4703351449568	16.6683526554968	17.1975693600992	16.5518334578607	16.4428432552791	16.3313047282596	16.5716268893357
CCL5	17.3009569305216	16.761213396257	16.3770655571681	15.8596761517292	16.7722882436205	16.1123936349966	17.0728295785436	16.7295736539364	16.6374067910237	16.1323148435619	16.1807162090933	15.5749598272218
ABCD1	16.4583175433581	16.3604173217886	17.2421143849694	17.0651996300242	16.2144158547078	16.6216375816187	16.4046821765011	16.8215798801012	15.6738250407905	15.5216058065761	15.9013307803851	15.8689526082084
TXNIP|LOC101060503	16.878587749846	17.2686544350863	16.7293487044686	16.3608677098058	16.127312750496	16.7231877917904	16.6699757345744	16.310714052173	14.7823673448166	15.7316493287399	15.7537969001226	16.0636985851933
RPS21	16.0752193348574	16.2002722847206	16.1635983757862	15.8128045601889	16.0285262024582	16.7111873195204	17.2412950948234	16.8682059867423	16.6312811649425	16.1356309744922	16.4830919554199	16.2810981997031
C12orf68	15.2350524915661	15.6130062437355	17.0121578493502	17.3065348136417	16.406425398259	16.3512817410745	16.7280764239761	17.138509353851	16.2460144925094	16.140840156878	16.4613769477084	16.3917399955829
TYROBP	16.9775681049846	17.084706590811	16.8532332952577	17.112435130714	16.5359478064256	15.4811067336279	16.5144844132709	16.3444576407435	15.5698180084913	15.5225159758997	15.6302374393936	15.9905113898711
ALDOA	16.5512696873988	16.3964488840347	17.8994440343363	17.3232071403012	15.9211164516377	15.9618301923408	16.3652733800839	16.223047055549	15.459074805921	15.3364663408478	15.6999408866443	16.0358737547995
ARHGDIB	16.8021268666743	16.863807720148	15.906971234466	17.2405643208436	16.6295193709107	15.9390484432835	16.5669676013909	16.1597806387824	15.7819947604453	15.5001548524609	15.7577297658156	15.7874280467043
GPX1	17.2929940560577	16.5075096472683	16.4688434331901	16.961821384448	16.7106100269047	16.2707808063916	15.8406428814322	15.9301418526144	15.934845097838	15.1464963319506	15.0301371652859	15.8471905633212
RPSAP9|RPSA|RPSAP58	16.5083394909528	16.5782790458313	16.2733175907023	15.0838317086802	15.9032410588025	16.9671147285055	16.9541125226576	16.9550529005018	16.2255378024185	16.2575264521462	16.0861441672109	16.451149905485
UBE2H	16.3512691361381	16.5562085043606	17.4567927187577	17.3626820239148	16.3176313575822	15.7063504879785	15.9848667348055	16.4673122182805	15.4609181374088	15.5659838088674	15.7495832409338	15.739805162536
GLTSCR2	16.3462436393826	16.263475914503	16.4802383172281	15.6972758688032	15.8352888360265	16.4213744069621	17.1269226016739	16.8922512658891	16.4640651313686	16.0089131947345	16.3639218342676	16.3086924871226
CSF3R	17.3761741050235	17.4729551192922	17.5414283781487	17.3605798137103	16.4146426216722	14.6984761942964	14.5366224224386	14.9689349640359	14.3769019572602	13.9265601631967	14.3047862245245	14.8504030982061
RPSA|RPSAP58|RPSAP9	15.7295381534296	16.2071789284544	16.0619238748053	15.5137992901074	15.1537716915084	17.0921870060263	16.8519154823647	16.9809697175547	15.8854702663603	16.0352845713378	16.2269754451507	16.6691955224092
ITGB2	16.6641181683165	16.7446071269811	16.2384476899892	16.9315856622738	16.1146915535099	15.6665301143747	16.4390784316133	16.3924159145164	15.3888630730422	15.3684796173904	15.4557843631937	16.0718928126215
RPS8	15.528985016659	16.0123216083164	15.883135889003	15.6042322808924	15.3219759678992	16.8782443486741	16.5589785738938	16.9854970815382	15.7323468340657	15.9352992216478	16.3641533624436	16.4041426729014
SAT1	17.1696356937653	17.3671809129385	17.3205754389224	16.6237110813116	15.7675628859384	15.8189273135643	15.7037596881443	15.5783154940089	14.7765722722201	14.6409278185921	14.9462575219916	14.9152527531952
RPL35	15.7217980462379	16.0394954768438	16.2851102545465	15.5971477467904	15.4174210233814	16.7358596031211	16.7727361696356	16.9549314048959	15.9886190227295	15.9210311787729	16.3979085547975	16.3834439096321
MYL6	17.0892521765773	16.9169027542762	16.0732178873238	17.4038302241091	16.4387798397599	15.5041312077553	16.2107143856381	15.4147997085226	15.5619453249993	14.9793519404345	14.9562965835624	15.0723614840193
SRGN	16.560360445943	16.8665644027792	17.1819409471404	16.7165954935078	15.8215553520226	15.9116405363832	15.8362474634658	16.0864481019493	15.1709953259679	14.9312190443858	15.3018565504425	15.0312062600134
EIF1	16.3536539896571	16.5808524333872	16.5714100968064	14.8292244981571	14.8827507326322	16.4721439138088	17.140058288936	16.9198188738326	16.4969680034875	16.3238166225359	16.3960766071552	16.4986175799875
TMOD3	15.4795344453727	15.6688216949349	16.6145184995175	17.2786518620056	15.9553158613019	15.9034665989056	16.3765562556114	16.6674115316723	15.9713887390511	15.7143007946913	16.051388656413	16.067378302923
LCE5A|LCE2A	15.2336864556534	15.4317323658842	16.4828465605581	17.1834419279317	16.3126447176141	16.1218805880645	16.5052120104694	17.0568218840378	16.0687008498466	15.7256261925403	16.1016863470841	16.0786876083663
HLA-DRB1|HLA-DRB3	16.4751883519197	16.7632931218579	15.4174301028925	16.8972655724788	15.8829833447009	15.8328210351421	16.4449879212175	16.3320296178266	14.3267750584126	14.673177666607	15.8388883331369	15.8251423411661
RPS10|RPS10P7	16.099512991255	16.1739052373974	16.2859039056258	15.3120728132402	15.3600940473791	16.7489099534158	16.5151288956607	16.6230377241361	15.7179818965518	15.6914533174243	15.7498195314978	16.2577131691382
PFDN5	16.3827151161125	16.3155367718845	16.1545016400683	16.3291742848331	16.1525732274979	16.0336721393861	16.8758739682755	16.3913987374377	16.1890478239271	15.8344100506832	15.7592395563095	16.1304944949534
NACA2|NACA	15.5213839517525	15.6695698257399	15.7985789031582	15.920247795354	15.5967512791551	16.314544816501	16.9701166413382	16.7040115255707	15.9497151982213	15.8345599717939	16.1327432387709	16.2942976964927
RPS13	15.3860006644209	15.7898895677245	15.8095940021915	15.5723000782971	15.3535867890102	16.2905035650798	16.6941934755379	16.6884880855731	15.9056524958516	15.6193805990725	16.0991981057647	16.3205571114494
NRGN	17.2902761740366	15.4037729540497	16.4546303950414	16.4652321847384	16.1828343251746	16.4896256541234	14.9972171557667	15.7732080126155	15.3353	14.4912372058609	14.7416176967619	15.1088376278438
PKD1	15.6755593350352	16.0124587588533	16.3624010167891	16.2892957878339	15.9643726536226	16.4925068426701	16.4706722046625	16.8159160093668	15.9031776948866	15.5158211026565	15.9909590340928	15.9123368358098
TMEM54	15.4459448844578	15.8109853511574	16.3406601850801	16.5938507564326	16.5218270445056	16.2931933781831	16.764957070735	17.0154577195051	14.6479231974365	15.6478698621948	15.9288713204743	16.4139510168037
RPS7	15.484540357801	15.490159414572	15.4582596193352	15.5132220235341	15.9727798728218	16.2446614606231	17.0864159046479	16.7015937660499	16.1257446432684	16.0407816224542	16.0612277432364	16.2630190359147
NFKBIA	17.3833786513129	17.4373057524018	17.5466675932336	14.780163781702	14.5265564029611	15.2109119068226	16.3039496045583	16.5571601474084	15.4069596135606	14.9234091407991	15.9000995379558	15.3510936678524
MALAT1	16.4098024448239	16.3518037184036	15.2102106974696	16.5244006701322	16.1895393490666	15.2776735501937	16.2764798529217	15.6208771829575	16.1129511561506	15.5321614996557	16.0958162247303	15.2095596195872
GABARAP	16.2845891077342	16.5097362964692	17.3260101157172	16.6761868311752	15.6180870938785	15.7610393770644	15.9224334827682	16.1106090407809	14.9629119703934	14.9769091068905	15.0692347649235	15.6701350538681
RPS23	15.3643726786852	15.9181014160508	15.9875675397453	15.0809490530555	14.9284754971911	16.6222368888932	16.5524846015097	16.7777876282185	15.3817700050264	15.3297695767922	16.0731598777532	16.2151152351039
S100A6	16.4935672369297	16.5092795788223	15.8022382014853	16.6291973364793	15.6615596801973	15.5773797556241	15.8676621327084	16.0519604386884	14.8608229704645	15.1110976322665	15.3253079528166	15.6506175015394
RPL7	14.9137364748441	15.4007583830741	15.4371279792263	15.2058390845472	15.2142045803243	16.557958634248	16.5188992427416	16.6876109388138	15.6853327747345	15.9145847185718	16.0203014467217	16.4645448912448
RPL36AL|RPL36A	15.8590292292131	15.8512156550557	15.6619437777762	15.4300809961296	15.4916395190758	16.3828742096381	16.7294147035138	16.2924562492967	15.6985533323739	15.5303321602191	15.5279231596617	16.0128796532769
LCP1	16.1599103967607	16.3940612413215	17.1336917217139	16.6974222158435	15.6673586123887	15.3453664259444	15.3218488582514	15.2260471620031	13.9449972670549	14.3902357209585	14.4044646787145	14.9733846447648
RPL17	15.2157364433949	15.7280469278012	15.9935242421314	15.3544418439404	14.9029461535145	16.5573320158599	16.4571127263364	16.6686715107535	15.3461939415306	15.5649801907754	15.6990845934366	16.2409358958537
CSMD2	15.187519377381	15.4995636546788	16.5842288789399	17.1288991552623	15.4035909599314	15.5874754807865	15.7002357794553	16.410123551987	14.8996049516753	14.9551338647133	15.417986389034	15.5585723885825
NKG7	16.7407569814793	16.6619689875932	15.5386459166387	15.304011383678	15.689279399194	15.7622718514721	16.6898101473935	16.325089933258	15.9394544617565	15.6133738584394	15.8064125445932	14.8410427152508
TREML3P|TREML4	14.945206375259	15.1852360931803	16.4239970091331	17.040195197342	15.8282486400991	15.6441405769543	16.1090280441474	16.4791462188043	15.5218224247047	15.4229813414299	15.7619197332949	15.8438105443581
ZFP36	17.0810331934805	17.1716123742962	16.9911998554494	15.2539312472642	14.3644794130007	14.9542404527076	15.1941720358865	15.4667384811331	14.193434334476	13.7730191746516	14.4681337048194	14.4073380162319
TNFAIP2	16.3066965566848	16.6776209621752	17.7284428949719	16.2794218674926	14.8417650020425	15.5625269819461	15.6036134385564	15.4065311776281	14.0383590400529	14.2508030508141	14.5378949554137	15.5328941149538
GNB2L1	15.5717030138694	15.865939625607	15.8206222931074	15.2304498051953	14.7698825630742	16.5339337958252	16.0535347572629	16.4396634577971	15.2454416377099	15.2210728391737	15.8826585450689	15.9771616756709
NPIPL3|LOC101060465|61E3.4|LOC101060576|LOC101060564|LOC100132247|LOC728888|LOC613037	16.5376320588805	16.1601798097162	16.2082533823832	15.7874241094599	15.3513311152296	16.1809393174283	16.0369561887748	15.9428788190983	14.9697001636871	15.3411403382233	15.4520550424936	15.6310613995261
IFITM1	16.1518379197331	16.5326097435573	16.3998005123601	16.4260379935626	15.5734696408861	15.5639411751302	16.1464314051617	15.7788472548577	15.2190411330055	15.1338547930195	15.4363906255288	14.6542453359676
RPL13A	15.4202819968819	15.6933929949502	15.8097887786424	15.4791201289776	14.9877657677009	16.6630355704894	16.3209627553595	16.3682825643217	15.3505984022924	15.5283563363531	15.5314616652466	16.0567022287663
KRT81	15.5028808232349	15.748792443395	16.7556806463584	17.1466531977253	15.2336949070309	15.7852067244375	15.431158427895	16.2151725871562	14.9483295898768	14.8734370422542	15.3364090658129	15.4042626397246
JUNB	16.7996185373886	16.7750946957212	16.2276027709783	16.3271807799314	15.6747473944691	15.2384502300041	15.5324970362581	15.450858351991	14.8304883275194	14.5533618750144	15.0947587581742	15.038987430829
TMA7	15.9472075935426	15.9366060279927	15.5276357854117	15.3849366162787	15.8154577233875	15.9346898755525	16.6413588730127	16.2827761882813	15.6973509898892	15.7437626032266	15.5614628744613	15.7713895214413
UBB	16.056052391998	15.9109975422721	16.7403582339026	15.9674939667046	15.3910295242111	15.959890447521	15.8783974506572	16.3606215180796	15.3495272498294	15.1612079740848	15.3539462143374	15.1107331314337
ENO1	16.3518325821577	16.2987097264878	17.6889797656556	16.2315361747467	15.2174493497884	15.3644097471934	15.6139213178507	15.2090829584499	14.1163608494437	14.2757995907168	14.278822251469	15.0971193497413
PPIAL4D|PPIAL4F|PPIAL4G|PPIAL4C|PPIAL4B|PPIAL4E	16.2046328271222	16.2124775882005	15.3435674977292	15.8204465082124	15.6191446492413	15.8184125742065	16.2379467742507	16.0543062357504	14.7188454826689	14.8536503957075	15.3366787604443	15.029857607333
G0S2	17.3238983953798	17.600319685153	17.8917899562674	13.8802724236591	13.9692945160189	14.8286309500312	12.9563638815834	14.7685976232411	13.5532793751397	12.6007545660139	14.144988411116	12.4909689042174
RPS9	15.9396135359906	15.9526194200219	16.4589731939506	15.745204163927	14.7391196893144	16.260158728497	16.4661727828718	16.3378882404832	15.3789229845259	14.9900993946953	15.654959970382	15.4345225335187
CD52	16.4312667165443	16.3966275353227	14.159709340554	16.1203779471732	16.0978709966057	16.1095914408325	15.8409180559494	14.9249532782442	15.1196345433769	15.1908394583098	15.1206745294976	15.2451614239247
S100A11	16.5610772122172	16.7592777817318	16.2998843757344	17.251322374954	15.8590967312974	13.8353155911536	14.5637607485098	14.1909232196135	13.4233209069606	12.9283533548918	13.4368343832748	13.6814967876663
CEBPB	16.2716740554972	16.8907151271542	17.6527112395865	16.0246882131352	14.378734800651	15.3552237134253	15.6158183668798	15.5563541424898	14.5055015644353	14.1748952292706	14.6455098038618	14.9503905991228
OBP2A|OBP2B	15.004248551714	15.2245528968702	16.4879373703844	16.6018667606423	15.6523300999931	15.6885148948132	16.0850310497204	16.5476578325391	15.4870372426338	15.0541572930381	15.9199594340479	15.6559522599553
RPL37	15.2344055831737	15.3488921073028	15.0700512748834	15.4465236961833	15.3874036316291	16.1871042874545	16.4893441124287	16.3204448620998	15.6888761691217	15.4694186264102	15.8117253070341	15.7798626686575
PF4	16.5883163200686	14.3615591170645	15.3191006813637	14.959769941525	16.9032164930208	16.0301764524498	15.1832021939323	15.2202123893275	15.0202	14.5941143940793	14.2178556903584	14.6794596850063
KLF2	16.1278233086911	16.2864329988999	15.7210452727951	16.3958867692796	15.789016460474	15.8172026219749	15.4665048256957	15.2629097969582	14.7918617160136	14.6043498753602	14.8125882029497	14.6268804884141
RPS3	15.482483576948	15.7540678858673	15.7580383588836	14.9301876478991	14.7585907349752	16.4092716821211	16.2344342850354	16.0986524715203	15.519579213728	15.3683875775015	15.5101590441692	16.1890437257291
GP1BB|SEPT5-GP1BB	16.7104434990856	14.7748764702643	15.7427836049328	16.3488274759472	16.2707606935942	15.7207976949454	15.3712755358725	15.3632422043898	15.8000584001906	14.6017684448387	14.6828306317976	15.2082052766287
MAPK15	14.8475629580239	15.1644527302429	16.7110859045831	16.9456145164643	15.3579441579141	15.5530994480482	15.6205163621226	16.2559312340925	14.9307362372488	14.9377468476766	15.5124487560003	15.3874959122552
RPS12	15.4110033990372	15.8275740622664	15.949608324321	14.7044943573901	14.3295050262166	16.471146252862	15.7723214156743	16.3315461729142	14.6812680802942	14.8172	15.2182122108499	15.6166097745336
ZNF429	15.905704431406	15.5915012818889	15.7687484323745	16.1035885978233	15.4584898836628	15.3337385551205	15.3636350165284	15.7583398761015	16.2171517971724	16.2478778417165	16.0951256121012	15.9084503288286
DUSP1	16.6359745731912	17.0678066577425	15.7689821940716	14.9645949660728	14.2383253329305	14.8736844529099	14.080905975724	14.7417354305814	13.2623880039931	13.0159212038838	14.0009787791695	13.7120903353372
TMEM238	15.1224752665315	15.3168663722803	16.7074751316501	16.7530718141549	15.5864638424099	15.3986463124138	15.8965413808625	16.0583833761833	15.0386372316895	14.7339141010082	15.3917719522331	15.1544064950818
HSPB1	15.0998975124544	14.9802806147187	16.5420199210665	16.6832367237597	15.9734509625801	15.5980628630959	15.9692780527263	16.0865497707493	15.656296663647	15.3047850336899	15.4740221332289	15.5669936735638
HLA-G|HLA-C	15.5229152204017	16.2767368245699	16.9606579585906	15.3274781517994	14.3060060823486	15.9087496143027	14.9953447201064	15.3950392336999	13.7493406722158	14.3603275456886	15.1948481732357	15.3336771208214
MAZ	15.3656204624375	15.273486437651	16.4733691585577	16.5682872175358	15.8916788449016	15.4905740227278	16.0075062518996	16.1657420091403	15.1653538820061	15.2075281593993	15.3722158539569	15.5979221819738
PPIAL4D|PPIAL4F|PPIAL4E|PPIAL4G|PPIAL4B|PPIAL4C	16.0803349139847	16.0905625598329	15.0698073318185	15.6444434063372	15.5381437137206	15.5254129797608	15.9857445902633	15.5823454924132	14.4921819325815	14.8728856551218	14.702426284815	14.9817367859367
GNLY	16.0571367252997	17.2621173221386	16.1167430614057	15.0185312485521	14.8711062106612	14.5171480071779	16.0419913659067	15.8773872037292	15.8467893251242	15.3555133450648	15.6591353656713	14.4515974447474
OBP2B|OBP2A	14.8751848542239	15.3259884616375	16.1922810638182	16.5471584687822	15.4815812828991	15.6166972324371	15.6759902278837	16.3697795247775	14.9290982152786	14.8065339292693	15.4108103640514	15.4892527250184
IFI30	15.9051475268197	16.0457809397407	15.886125386695	16.3964781568608	15.4800664809686	15.0517398826256	15.8729831255407	15.4067088583376	14.5447381447666	14.4714061533482	14.3037749806669	14.7532058432492
FCN1	16.0483846275321	16.1138112055092	14.3910098576582	16.7695	15.0067660369284	15.0900175924383	15.7714251229796	15.9544715971368	14.3841683956326	14.1830294068189	15.0161735241314	15.1588440787177
ATP5E|SLMO2-ATP5E|ATP5EP2	15.9041084001533	15.8614544414864	15.1838282336816	16.1308826861865	15.6277359331242	15.1505497513016	15.9082538206133	15.6315333248659	14.7872353642128	14.7662342036906	15.0120705159025	15.1377140625811
PLA2G2E	15.4748560038431	15.5269341094648	16.1246065291304	16.9471824790767	15.4117897533545	15.049806037382	15.4332154423138	15.7362177394226	14.1762756764105	14.2938912985366	14.7433478769121	14.9168455176607
HLA-F	15.5518008822402	15.9693616389106	16.1936997157848	15.4300356891384	14.2592619766669	15.9879753656016	14.5797465024707	15.7816928827876	14.2796718587453	14.7395470308773	15.1928136354734	15.6708300585074
RPS24	14.9839	15.5751781181041	15.1431082904521	15.2809606459189	14.4663611928164	15.8616971476887	15.7531812816192	16.3014030164303	14.3830471084742	14.5801941942783	15.3079214510796	15.5314075250525
CAP1	16.1556393821085	15.9073291911144	15.5802102935955	16.4651216413273	15.9685119343117	14.7092520848395	15.2278750243137	14.5751201201568	13.8027561326632	14.1034232342329	13.7866782462318	14.3306799032733
GMFG	16.0968001235951	16.1533175711508	15.6034104777029	16.4130998024488	15.3797712384591	14.8694943176573	15.4212747177298	15.0584511313966	14.5407213835445	14.1351456745724	14.7206576082696	14.5421573952508
ATP6V0C|ATP6V0CP3	16.3227448974678	16.1607491611051	16.7385774510539	15.7377743454734	14.2178181897161	15.4973379137734	15.6519576796562	15.649525117438	14.5241347335271	14.4425821971049	14.9585472378012	15.0557107203184
MYL12A	15.9310924018505	15.6688216949349	14.7095400314972	15.7466782711641	15.5511867510979	15.3541305265728	15.2190548935411	14.6897758452184	14.0153859176677	14.183343358135	13.916538029328	14.4853550843666
KRT14	14.6404550066132	14.8439536739403	16.0250149948689	16.0755654351382	15.6961599942553	15.4256662233855	15.8862915943332	16.3275789289946	15.3530819451581	14.8370846916997	15.4278297840246	15.4266403487727
NPM1	15.0892302418572	15.2040440302447	14.856561901216	14.8437184166042	15.2794196144359	16.0100246948189	16.3539726045868	15.9697350283857	15.3198326379454	15.3396153200847	15.3003363331355	15.6208776957214
PABPC3|PABPC1	15.060482576792	14.9765173532047	15.087855711648	15.5689503701956	15.2876002489334	15.3151059272198	16.1356460039042	15.8004202102563	15.4369852723656	15.3338526426957	15.3851812615996	15.5930600239323
NACA|NACAP1|NACA2	14.4895938141711	14.6148080616906	14.6100070091794	15.2781444747974	15.311200908244	15.2424757162462	16.5034839347471	15.9470588862899	15.6350403643151	15.4766520510951	15.6385011381255	15.8295649314382
RPL4	14.4429870111812	15.014811170776	14.8988622916274	14.6407767703979	14.4010409854723	16.4054686641549	15.849177779887	15.9855128900502	14.7980445900576	15.1529227558753	15.3216339350967	16.0564212660463
HMGN2P46|HMGN2	15.5546252618218	15.8865883040372	14.4484325212264	15.8616090692754	15.2123282559041	15.2939391826517	16.2832526114297	15.7005988929623	14.7367468055189	14.7631921062698	15.0847852605765	15.1114867724372
FL	16.4749449570572	15.9170615057561	15.6208326843185	15.9591036739551	15.4311197656705	15.3415842750138	14.9281206924356	14.6630274337373	14.7811193946173	14.3935410000459	14.4118215894848	14.7615030050275
TOMM40	14.4338746259699	14.756258972658	15.7165506802307	16.1618228593674	15.6340275410956	15.4549990533511	15.7625231801948	16.4027711461828	15.3227985666641	15.1229848745113	15.4594008733052	15.7547007159066
KCNC4	14.6386452688992	14.7946609899558	15.9652414417999	16.6312973453942	15.5262373546039	15.261583118484	15.6875520473752	16.1684340749647	15.0707019458721	14.9324024566978	15.3147825767453	15.1643672764279
RPL30	14.567185733893	14.9450757206569	15.0895412417548	14.629023172356	14.4939038511226	16.0590147064378	15.9151341267084	16.0952298404887	15.3034101350402	15.0178556629378	15.5761375460541	15.724678432577
ARPC2	15.7464921945363	15.9658530711726	16.0631770885149	15.6866013582929	15.0749305035094	15.3698064367139	15.4333883287989	15.2064997724714	14.1874519904463	14.3659164928054	14.5176198241635	14.6610986026294
HLA-DRB1|HLA-DRB3|LOC100507714|LOC100507709|HLA-DRB4	15.5143743731212	16.0134458575803	14.5518076291059	16.0867165253311	15.1209595972289	15.4735709456254	15.4932134249821	15.5010103873116	14.4953677396688	14.3031657874993	14.9402950351763	15.6950626999979
RNF125	15.5744319376264	15.2638869097482	15.2958118290689	15.6444434063372	15.141103045112	15.1310480756742	14.903732368744	15.7348031381123	15.9042462877369	15.6675089926172	15.7053639104186	15.5442597796578
SYNGAP1	14.7639007822906	15.1579704389407	15.9469837957634	16.6698890768519	15.2216592965015	15.1971002244247	15.4003194563015	15.7171697430156	14.6491052430372	14.5116330267851	14.9212096333681	15.1124330968257
TAPBP	16.2676750192013	16.077407155422	16.1080579726578	15.6111223520525	15.0115152536807	15.1034400055302	15.5735656821511	15.4013094546398	14.8701365344436	14.6824249807668	14.859483771885	14.8121874817744
ELK1	14.1894795021332	14.4280904784278	15.7195255931902	15.4769727212317	15.5469150740178	15.9429741695029	16.0098267886355	16.2183646497099	15.7789004700279	15.3153274708171	15.6719814507601	15.380362332342
RNASEK|RNASEK-C17orf49	15.9815087880666	15.9274997653925	16.9855496736217	15.5523339363521	15.250017212659	15.0236903015361	15.6055411293389	15.4046345553116	13.670410552943	14.4137950707402	14.4243105517654	14.9527000957617
RGS2	15.999895770676	15.4904154553784	16.2069722247476	16.1174971359734	15.2806055328005	14.0307167935487	13.273699590812	13.5033048255899	12.6417122395771	12.5610377285439	13.1715068645957	13.1034205653312
CIRBP	15.4751602596442	15.8306730443615	15.5902799398943	14.3864889170467	14.215392516695	16.0446327055156	16.3754269316427	16.019080446545	15.1799760012189	15.2598938676465	15.2632202400599	15.6319909822655
TOMM7	15.3282708390037	14.975110632923	15.1449363916285	15.0874269470518	15.0503476823671	15.4212283935489	15.9345356973588	15.4523796645495	15.4160879243919	15.5326749419988	15.4353416581844	15.4168869202158
VIM	14.6843445692451	15.1207447730957	14.7885182218427	15.5995466967564	13.9408492900211	15.8428027319153	14.9863125706107	15.6333438998942	13.7952453724412	14.2045333371967	14.7903129864456	15.4973186066061
PPBP	16.3316438458146	14.0146377801366	15.0289810588234	14.7318037285439	15.8628414956986	15.5284934214103	14.2884559729203	14.8609490454377	14.463047105326	13.4092706145972	14.3659179632369	14.6235517975565
RPS25	14.8119055429329	15.337288658023	15.3741386951127	14.2075435743835	14.105779133151	16.0449330701181	15.6210561579877	15.7936877743155	14.3962230820675	14.7597225882704	14.9807189551027	15.3685288087163
RPL12	14.5155824038932	15.0374167134559	15.1177669080579	14.7015696285293	13.9499494905159	16.115483077747	15.6658563347883	15.9242585250922	14.8806621034858	14.7415382450965	15.7042495830691	15.5222231714072
C17orf49|RNASEK-C17orf49	14.8750926293658	15.2010627409495	16.2826915962334	16.2379686569536	14.9468059382511	15.1622903066684	15.1921754573996	15.7855580502611	14.7222780572447	14.8421307449411	15.0870847435349	15.0864653429366
CFL1	16.1127927664054	15.9826253174781	15.6371691988451	15.7535375929914	15.1543774376298	14.7112955409298	15.4660542145765	15.0138527250279	14.4413779107327	14.2424908717237	14.6439487548528	14.5419280464498
COX7C	15.0437319167341	15.0482402332871	14.7031931496471	15.1540599662359	15.4476579823392	15.3042229519614	16.2310458323853	15.629961473977	15.0605447506358	15.0972523500805	14.8706396368064	15.2383481041477
RAC2	15.9823795005255	16.012074704707	16.619165967976	15.8671246349187	15.7221893076767	14.0453701630418	15.0859156791439	14.1849270858059	13.2704956585129	13.1937021454169	13.5744645493659	13.3788966992016
PSAP	15.1378542726839	15.3651363952682	14.7248386297141	16.5785629653292	14.7635801371313	15.0327628308697	15.5444269384304	15.7366300703518	14.1761030552757	14.3757941644081	14.8753811801525	15.5108576471277
HLA-DPA1	14.8794821344161	15.171544857294	13.732292799405	15.7226509713223	14.8648952849216	14.9161216054416	16.0655939080749	15.8706296464519	14.5818285820004	14.5192802702391	14.6567861716858	15.3290324233328
RNASET2	16.0218329547889	15.9509459119031	15.8430954130349	15.7976088619645	15.2262237115027	14.8519245230215	15.1974332162931	15.0995154671081	13.6782326132606	14.1030913983439	14.3698324895415	14.2670974507144
LOC401357|LINC00265|LOC100132062|LOC100133161|LOC100132287|LOC101060495|LOC729218|LOC441124|LOC100996903|FLJ45445|LOC100133331|LOC399744|LOC729737|FLJ14186	16.2622081359514	16.3826470931323	16.9077670917552	16.3133082467904	14.4051187546079	14.5102641142612	13.5834686344681	13.7771253650573	12.8252922550175	12.7693085980846	13.2874694546984	13.2626232284695
TMEM66	14.7134184704072	14.9790459990465	15.5577137456724	14.8754742649056	14.6081722972996	15.9936460286191	16.0762127781769	15.8578637995731	14.8211903964318	14.784353299336	15.0818387091803	15.3348194140945
HSP90AB1|HSP90AB4P	15.9153483581905	15.8820618769569	15.0599610435719	14.8951694124089	15.2634284254559	15.4826958111205	15.793113305381	15.4550452667408	14.4117744074117	14.7328063202617	14.4268038677849	15.085993496341
CRIP1	16.4313503466528	15.7517365799214	13.6322435814441	15.9067993119684	15.1866349611752	15.0136470326459	15.4789534711303	15.0184913895691	14.7387351857252	14.3162988461044	14.5095489235736	14.3940578672686
OST4	15.5354379252415	14.6798765173178	15.0440437796924	15.3057161729496	15.2727908261521	15.5495198714532	15.2356285143834	15.3115302806774	14.5427311617896	14.250403560248	14.3091448390898	14.9448283393345
BCAM	14.3829820285327	14.3640118633541	15.6645308287721	15.7758841137597	15.4884765497608	15.6922923486711	15.755887295589	16.1144850184577	15.1911665063577	14.9011865399245	15.2749483095385	15.2724084959661
CYBA	15.6910443508408	15.9818830763464	16.0096240503806	16.336057405217	14.6122265619106	14.4792560742245	14.6906	14.9624024361831	14.1569000191512	14.0796711471216	14.2773243876077	14.6759890137236
HCLS1	16.0381245906569	16.089756851205	15.7388337683271	16.2888586565132	15.1204242065322	14.4031416565264	14.6898110639339	14.4061341227785	13.6286341364905	13.4861015049384	13.6769276209644	14.0650223658992
PKM	15.6529124476601	15.2548260710124	16.6874836231613	15.4919378816019	15.3470500463486	14.7622112157265	14.8596132356455	14.8076730517545	14.2211401088114	14.0257761425328	13.9493585238379	14.6173339432455
RHOA	15.1735886541494	15.2900994910578	15.7683810160951	15.4958390250225	14.6108229084976	15.4276175521424	15.4418726686337	15.4671360931714	14.2281507326433	14.4813131974492	14.5669979938911	15.045352193489
CCDC27	14.0383399694441	14.2956024905213	15.1401681756877	15.4578564276652	15.4753362207213	15.7251456409836	16.0659408725726	16.2398654206699	15.3150979498098	14.8978425581364	15.1519683143805	15.4182619987907
SLC25A6	15.122190357386	15.129066816678	14.9450797454218	15.155074501583	14.8047814499217	15.360463999847	16.0169199155521	15.6735601079466	14.988204664545	14.9636884978729	14.8906155681166	15.5697101975716
SNCG	14.4969642822231	13.8760146007617	15.7302499435393	15.9197477499457	15.1821323910802	15.3036859825998	15.3745005393161	15.6624423668353	14.7537926820241	14.2396759251069	14.9356734193056	15.0329005055794
ZNF430	15.4484676494222	15.2209017429133	15.135280533985	15.5509596525564	14.8607172683909	15.0625438503912	14.7369524657929	15.4583060748066	15.2847986341917	15.4179875615099	15.2400990163627	15.3257056033928
LOC101060467|HNRNPA1L2|HNRNPA1|HNRNPA1P10	14.7308506970477	15.0146194690136	14.400869726469	14.4505594629246	14.7130417139814	15.6552918548427	16.0377397511887	15.8034935672685	14.818759769419	14.8428265113443	15.287419157693	15.1836438962795
EEF2	14.6430209403803	15.0137701993579	15.3255629252073	15.0453384527184	14.031107071324	15.9471433924852	15.6198075733895	15.7552268428496	14.7674348050417	14.681239885114	15.2764955013858	15.5215545181079
ARPC1B	15.8095713408789	15.313441795311	15.0668496297742	16.2309641640743	15.548403220563	14.0598761952106	14.9045917122353	14.3863588912646	13.9908638304647	13.665808180368	13.7801489760983	14.3168055521164
ADAMTS2	12.2544349929959	10.3581108527244	18.0586249028922	16.7531351956321	12.419	14.5072864087989	13.0121641666182	14.7760898688481	13.8184357726531	15.2101497137159	14.2687755838046	11.9885583197541
PF4V1|PF4	15.8535007441808	13.6995903361319	14.4434198323914	14.2863876089981	16.3574779353911	15.596519729654	14.3220848209606	14.5883131896536	14.3020716320762	13.9390086943177	13.5394339501051	14.0737743861749
FOS	14.990862510994	14.9647431055646	14.1492288896907	14.1564292894562	13.4721151273933	13.9697735766961	12.8907276455787	13.6495572536673	12.1149586441046	11.5285736272865	12.6474012387429	12.7026423553046
RGS6	14.9208720805397	15.0807552567557	15.3533327521459	15.8961791323646	14.6602032203613	15.2006157222808	15.2585553280961	15.541219598952	14.4461101453554	14.4194031867645	14.6985493739277	14.8846512543389
RPL8	14.3322899050267	14.8828222981472	15.3221988889726	15.0801408762757	13.9767861336982	16.1188977285817	14.9661130648971	15.6229815817929	14.2298149196104	14.4946987603659	14.9050240906394	15.3922427128702
BASP1	16.2200485233064	16.1315860635978	16.7894304480848	16.3513416658636	15.1013879073492	13.3046732680035	12.8652092841203	12.7242718693354	11.8091621639898	11.8183376107564	11.7133274091999	12.1118826128603
S100A12	15.8875931303686	15.8079069577384	15.8128530464518	16.6969045373152	15.4364724952976	13.2266704021579	14.575227035852	14.0044362855005	13.0799	13.6443034043807	13.0719955804965	13.8619146193646
CD14	15.7075393733033	15.8615458046642	14.7583590815477	16.3773854796046	15.0600783255262	13.9852014682178	13.2146606015478	13.5535427704142	11.800677380611	12.0251405037682	12.3719464466285	12.5969909723848
GNAI2	15.6198307429155	15.7531817768786	15.6188701880478	15.7601121850043	14.5545282421048	14.5509258487923	14.782330650939	14.7120409982862	13.3964557788362	13.5675703131964	14.0049437256162	14.2703543961776
ARRB2	15.5712097406867	15.4957426013824	16.2489244170503	15.651649743682	14.5842585572902	14.5244000316061	15.0441360228414	14.6478999745537	13.7100576864402	13.8324114498429	14.1421109728418	14.503606708936
DEFA1B|DEFA3|DEFA1	13.4510208490309	13.1565564456772	15.6125945287912	18.0131762486107	14.8352544794909	14.665693348572	14.2720949673276	12.8382627832754	10.7473649454886	10.1650495064087	14.1880233324075	13.1299843112031
P2RY8	15.4939399415358	15.2076422139529	14.7158591136177	15.1827385904907	15.536877247111	15.0232649532005	16.026170664863	15.4347288749729	14.6095132052313	14.5341260387196	14.5212627568159	14.5074585464974
GNAS	14.6391160191043	14.4508988008925	15.3389861595583	14.6511921329033	14.5177242016312	15.7632910345583	15.0852556626929	15.2506881150204	14.240750667858	14.504698928293	14.5892765711937	15.2550416475037
ITM2B	14.3413083884642	14.8691947061801	15.2202833079664	15.2662155528067	14.2969572021164	15.2821364689423	14.649303571876	14.7988775693491	13.2753384705765	13.7106409339156	14.2924188949531	14.6387523258266
FXYD2|FXYD6-FXYD2	14.1529247568393	14.404497784216	15.258648794367	15.318279181325	15.454403906426	15.1133588862499	15.4372632242335	15.9321182152096	15.4309937564419	14.9488075514255	15.5021664070329	15.4216939721241
CSPP1	14.0510224935074	14.261111571575	15.1925184317893	16.2132237070575	15.1954911475533	14.8117194931481	15.0530894332725	15.732182463465	14.6659832984655	14.6330579355245	14.7254714805746	14.9082859009297
ZFP36L1	15.4660657839345	15.6553412709051	16.2917610691736	15.107962883157	14.8866666835354	15.0533795320845	14.8185802258271	14.4587515672114	14.0622802859042	13.8384044587462	13.8200464127091	14.2908013342018
RPL37A	14.888860884431	15.1117856761454	15.7175718359325	14.5057276222725	14.1853152823179	15.6501494622899	15.3339588072833	15.2387612771101	14.3015178338169	14.4825042877462	14.6638968815239	14.8405532844282
ATF4	15.4674937661788	15.5759949656793	15.3471281850527	14.5905847068201	14.1939653007732	15.4385262603142	15.6335498104019	15.5288388033823	14.6884266252024	14.5980446205819	15.0519005183367	15.0084794446604
RPL29|RPL29P2	14.7656264450837	15.0967032200903	15.1032994032071	14.4942462396032	14.157237506047	15.7273756404906	15.3547575335028	15.3565740370313	14.499236642626	14.3946712064523	14.6556336685863	15.1482612573808
CST3	15.222590548224	15.5399704259554	13.8075017391989	15.7063950698547	13.6023721538577	15.042590409053	15.1929018057142	15.2681021609072	13.6115022616479	13.8980243961808	14.4004281313478	15.0986600089646
NCF1|NCF1B|NCF1C	15.2179924463637	15.5978768189475	17.4670277888604	16.1239533857578	13.7502364982001	13.5310945684117	12.1893482825213	13.2762540698082	12.1985782077229	11.8834203108261	12.5999572768819	13.1785194909136
APOC2|APOC4-APOC2	14.6200550977262	14.7960638420284	15.5074632033873	16.2299495871737	15.3465200421725	14.7630266540491	14.9099855531346	15.4387745616369	14.0938751496746	14.1782594180538	14.4087465161888	14.6343756954959
BIN2	15.6231842412271	15.2757963908312	13.4054766765673	15.806902495383	15.4841243274927	14.085146955475	15.1128395625621	14.6108769330903	14.278546708357	14.143775322459	14.1263896570855	14.1175251090096
SOD2	14.8357958662268	15.2112792416504	17.5419170048694	14.808671287748	13.1976565908827	14.719055395572	13.8027380887349	15.2551024883369	13.6006102136431	12.9277288766591	14.1171042577351	13.6456584155232
H3F3C	15.3285627291659	15.6128977032786	14.8783624690178	15.0975032633307	14.4633867001847	15.3332467782117	14.8552036297103	14.939824712355	13.7716761040356	13.9604163359442	14.1061776378971	14.5275209191329
LAPTM5	14.9039461349662	15.3901997226608	15.6222011483435	14.8076951852695	13.4568389714422	15.5380925137854	14.4554879057733	14.8467005595023	13.2927984415062	13.6408784179821	13.826590018793	14.7122632594398
TMBIM6	15.4172661318082	15.6474147104014	15.0365182076258	15.5213253420963	14.3289197538337	14.7699900405477	14.4706919894539	14.3450184360218	13.1424068020727	13.3768790344769	13.5921178484331	14.0932744407853
MYH9	15.2622460972023	14.921781485566	14.7613162466114	15.4165161812376	15.1771009555489	14.651818516849	14.4800208282712	14.0241808034441	13.0777152210781	13.3985840702751	13.4160556325333	14.1933729061816
TAGLN2	15.7886377484495	15.2696818279714	16.280175162936	15.3941163717361	14.1621195420887	15.0423105481035	14.0071464148793	14.3993938889475	13.6278770240612	13.4911824053561	13.6322924832857	14.1553478265171
YBX1	14.3472599935299	14.488576242053	14.3955157020236	14.7426427270923	14.5065534518706	15.1823043711086	15.8395996379592	15.4661986897541	14.6163362379256	14.7618263222807	14.7026006751663	15.2786503398092
SMARCD1	13.3973192306079	13.6017653376746	16.5300113789575	16.3634321967257	14.5543196240042	14.7471792451568	14.6550145598979	15.7982322268026	14.1474219306977	15.0735387528156	14.9172478640729	14.8040580182007
CTAGE1	14.2307157731027	14.4774117371071	15.3398631290817	16.0448880865371	14.4462645118939	14.8810584567732	14.7569524922253	15.6432930656118	14.1676192066579	14.1050812697532	14.6785460502249	14.7827675813757
MAPKAPK2	15.7688196169747	15.5409976118467	16.3621464865466	14.5676216828231	14.1982976411373	15.1544264199439	15.3629292450061	15.2464256580787	14.6351703629512	14.3892834823996	14.3774550620662	14.6744990234397
HNRNPA1	14.2342672927688	14.6861147735476	14.328852689836	13.9846440207074	14.3726899146268	15.3809380841427	15.7565015913276	15.5761053775915	14.7059897740275	14.7862836629157	14.6489888521729	15.1777882727751
FGR	15.1852895632654	15.0517945153686	16.6056926582227	16.1534502222868	14.3372375457988	14.0827267980482	13.9010226796656	13.6084893529185	12.478557719328	12.7499389463222	13.3913428062123	13.7125998652315
S100A10	15.0441147810583	15.0203321819014	14.1726406342175	14.8544603304079	14.5949674048389	14.8858236277078	15.4104838916086	15.1441043178841	13.922740482762	14.1380639553476	14.3807282737585	14.7362665306566
CLTC-IT1	14.500595589795	14.6551070682971	15.6059363172997	16.0863859745499	14.7483410254233	14.650074742623	14.6431713281236	15.2884296246183	14.195139029508	14.1930421130291	14.4440957386961	14.5762092465972
PRR13	15.4202187916488	15.4357878934032	15.5597225574139	15.7662622302021	15.0260911095543	14.1464785959696	14.8185802258271	14.2211756498276	13.6006102136431	13.8500526601815	13.8437061626179	13.9739418253689
PLEKHO1	15.3207963284426	15.103234280564	15.5453678566102	15.4732180423568	14.752165920962	14.8702828667637	14.8960030367325	14.7029784043611	13.9254130655222	13.512162298762	13.8897699799878	14.1079511705386
GPSM3	15.8638706364716	15.7345962985462	16.7454413823141	15.4680200443947	14.4633422585664	14.335930793713	14.2109285824436	13.7775376201119	13.4913594411111	13.2114615347595	13.3987667641877	13.6930067981788
YWHAZ	14.8655927046462	15.1725025750443	15.1009403065352	14.6565072974469	14.1040698461592	15.6034793235326	14.5387666650823	14.6522276110745	13.1055371613842	13.5941027211758	13.635072751957	14.213132827138
DDX5	14.9202167193068	15.327003377247	15.1340884398091	13.9368497033633	13.3860209994227	15.5797825692382	15.0154	15.3210670816262	13.9306411035639	14.1798861310819	14.7728797445708	14.8124251927644
EIF3L	14.9638275989348	14.9156640422113	14.610156128437	15.1488664511962	14.7101980795123	14.9219139247213	15.630587323417	15.3863260139753	14.7052721977738	14.321062310411	14.5493817861484	14.8226334779848
HSPA8	15.2657209319172	14.8619670445423	13.4518090378172	15.3653105146633	15.0168243603826	14.5854491421229	15.0848643990863	14.7762503192583	13.9625186995624	13.7783632144606	13.9611847322199	13.7379998033877
TLN1	15.9959996152652	15.095331299712	15.4757961799341	15.4828376590771	15.3274555543148	14.5893622737354	13.7184812324418	13.4846856869864	13.5373749598917	12.789384420813	12.6947378699973	13.3275303102032
CLTB	14.4630057534239	14.6808433172265	15.391854331846	15.8217939421859	14.6060805015264	15.1121594153605	14.905533629409	15.407789277136	14.3643810647208	14.3697837300562	14.4730490014409	14.7896901052197
FKBP1A	15.6651428763493	15.2959705690977	13.6703562369305	15.7571356562085	15.3124350147854	14.4745758859048	14.9308717515661	14.5140599991965	13.7466695819977	13.9467964721594	13.6808983982552	14.4637554318297
FCER1G	14.5350922228074	15.2332404911099	16.0876540306342	16.0467803311529	14.2682952780604	13.4232887920257	13.8176495703887	14.2610305475381	12.2929800173256	12.7167776800023	13.1498765252557	13.3757473691238
HCK	15.2425307404794	15.4375254112369	15.5971234842094	16.4700877252099	14.514939612303	12.2219266786047	12.3964936735992	12.1334135962875	10.8668305456941	11.0222659877646	11.3434901314096	11.9694140707981
C1QL1	14.5255269869046	14.648627097548	15.5377446737297	15.3490125927513	14.5278744566769	15.128769671971	14.8683922178938	15.4671076958771	14.1464530661796	14.2808940477356	14.5725808919398	14.7395703443232
HDAC10	14.7767273997978	14.6806016777072	15.4116668342863	15.0498860560568	14.7918152175945	15.5330420322259	15.0906735205623	15.414284311367	14.6715044935752	14.4655667874194	14.5736491198419	15.0259680679216
HNRNPA1|HNRNPA1L2|HNRNPA1P10|LOC101060467	14.2345548711505	14.7309447930112	14.1240740542282	13.780464086536	14.0944028403103	15.4616384214741	15.4743118113444	15.3955913916203	14.3294939529074	14.5182021378772	14.4822609193731	15.2664692413419
LASP1	15.4544673133341	15.4116771614585	16.1131306262767	15.5469751659182	14.6829766102134	14.2860995277662	14.6345087426992	14.3706873421093	13.5037928037834	13.4611157450923	13.5260159066939	13.9686617781294
PTPRC	14.1669550220664	14.4392744809201	15.0015904458466	15.1748924079346	14.0684003270094	15.0160147756612	14.3857290604261	14.3362145295606	12.6351968287762	13.2364875749491	14.0479086515674	13.7604490789122
LGALS1	15.643684633836	15.1522059788176	15.3473965600253	15.6689338757236	14.0311670370761	14.4737044408448	14.7422964350313	14.8126207938528	13.8797158466438	13.7396787991572	13.9925	14.4001439652332
RUNX3	15.1919933729267	15.1506117213673	14.9635510270068	13.3182877170868	13.8174235501715	15.4832732239378	15.6499588202474	15.7423082348904	14.5654469073258	14.5102155008122	14.6582255062196	14.7246684954303
MKNK2	15.0312055891729	15.137994996112	16.0408658799124	15.0370331769184	14.5425044911355	14.5814098016771	15.2905491649398	14.8467223872594	14.0673151797109	13.9578494477079	14.2997229020746	14.5305005768065
TNFAIP3	15.8131218614428	16.178215167558	16.4359710469572	11.3922744745895	10.9187843198465	15.2225932234717	15.3407134450486	15.7971143983091	13.9247967546556	13.8838640092709	14.5085917374854	14.2194924830435
SERPINA1	14.9135269490163	15.4054241095169	15.1026636221383	15.623755149526	13.7521295121247	13.9821115513375	14.0885373929845	14.4361539820171	12.9770720849457	13.0959219182835	13.7353032033007	14.4252610071432
RPS5	14.0510224935074	14.5578727923119	14.7473848992262	14.0436353086733	13.5250242136303	15.5967293878804	14.8159599198233	15.3669605246602	14.4607105430427	14.3014313565584	14.8870292038325	15.0208342244669
RTBDN	13.9451838187437	14.2567648011688	15.2423380819048	15.9497165141526	14.7034783417212	14.8728662853128	14.9730010477175	15.4113504057668	13.8626551296392	13.818128023533	14.4532865291655	14.6870244151918
CCL14|CCL15-CCL14	14.698033995165	14.6578101807332	16.181408316976	15.9765804232265	14.0063695375681	14.7217667566387	14.3167632683121	14.7763190784779	13.2178014867803	13.4174785626874	13.8524716229328	13.8407214152938
AHNAK	14.9687049145042	14.6064732995416	12.3022974652603	14.9492811072308	14.3494085919059	14.5719404577074	14.6678720210885	14.9261106390048	14.1315744397255	14.1398444475931	14.766154096689	14.388775153859
NOS1AP	14.2471043856186	14.5952726392262	15.2469965832781	16.1670787611081	14.2761596076218	14.5473408686459	14.6594226148863	15.2260303809112	13.6167268195581	13.9420422716534	14.2980157832193	14.4727169155169
DDX17	15.0460821963095	15.3141095584693	14.7963045929869	15.036795179297	14.5680654162464	14.5623695143789	14.2487073871659	14.0827329143957	12.9113928638722	13.3686202029423	13.2915560477716	13.5310845966894
CLIC1	15.293590436377	15.4405049783483	15.9014985891068	15.4195086644265	13.9060231445982	14.4998253362541	14.0853136419493	14.2816509615981	13.0938879881718	13.1781388322531	13.2432711859429	13.9545151641996
ICAM3	15.7981700538473	15.8277455366576	15.3276728065921	15.3708913228966	14.8339144670701	13.9558440617112	14.4252473674793	14.3575730036778	13.4605078986923	13.4256400772172	13.6204531160509	13.9539981189047
EIF4B	14.135937112141	14.5386886254591	14.4080491323836	14.1832346073402	14.2560330366439	15.2741027823288	15.4259547549355	15.2778808483243	14.3646840538255	14.3786757859061	14.7383552471695	14.7800475863176
UQCRH|UQCRHL	15.1638068219289	14.8102387507892	14.3454288088348	14.639445056051	14.8351857911107	14.6240360760359	15.3471103669527	15.1970453955468	14.0472580821386	14.1465688801809	14.0640152697545	14.4817426509142
HMHA1	15.8113396606135	15.4713246635854	15.6494464330129	14.8590107897889	14.3972308450696	14.6576585533199	14.6936	14.3364632636648	13.5581889246868	13.3934371310915	13.9252916961758	13.8657680205576
PSME1	15.0131040719021	15.0647083887806	14.6100070091794	14.602855324581	14.3306748577636	14.6643845980643	15.1198269926287	14.9319041316325	13.8100055128867	13.9255596246654	13.9158161820697	14.3636255616144
GDI2	15.1881629046223	15.1468182839017	14.2031120230454	15.7775230857267	14.4214070491203	14.1833436807288	14.9415267247933	14.5907914336075	13.6356814222727	13.3181443358584	13.6578437796625	14.0772603819929
FUS	15.3989518114004	15.6023667268559	15.1864307931691	14.6869701336627	14.2744381953687	14.8415	14.8505503611526	14.5297797510884	13.5463511047832	13.956319366805	13.8503324684449	14.1096931020903
IL8	15.5073504052339	16.4532245349807	17.3652416985388	9.86525477821755	10.6605129167817	13.864039388054	10.5229160731571	14.3740836905949	11.593960538785	12.3342278905456	12.4057575517331	12.1946004372436
MBOAT7	16.0812812429397	16.0290126985657	16.2514959053108	16.0241480602144	14.2207656893408	12.8767106278429	12.7683918184568	12.6511673742194	11.9643613087156	11.4938942198985	12.2717011731543	12.1964958976588
LDHB	14.5904401503289	14.478285840612	14.0596899082496	13.9653907837193	14.7527478728563	15.153701147481	15.5492387749341	14.8869518999189	14.515564703092	14.3869682848104	14.267974476642	14.558575409622
BRD2	15.5945119356514	15.653847364108	15.8157653580022	14.407304545594	14.0551327218519	14.5519091754737	14.9559330000271	14.9458284463238	13.7101769109771	13.8464887705137	14.0495548511561	13.9443558192451
PABPC1L2A	14.2122418932001	14.2484	15.0189354024544	15.7954827021097	14.3195229691342	14.5972520984212	14.6745830953908	15.1103016895219	13.9621182890146	13.6942852478306	14.2999995423785	14.288957555833
NDUFS7	14.3328272347828	14.4416801850648	15.0894610232122	15.9583813326552	14.6998238007235	14.6784458591963	14.8838248668448	15.0909902211045	14.1901898546132	14.1740002965848	14.260460148965	14.6406277928166
BARHL2	13.9244780800122	13.3286567280527	14.0595807132146	14.6552675509744	15.6929417620472	14.2307076400684	15.4438381968095	15.1973193167361	15.5997925108135	14.9545208738971	14.9116166686015	15.179687509321
IRF1	15.2616347877872	15.5219908760381	15.9804474430051	14.7933261002921	12.5618523290541	14.7237053150251	14.3656570809947	15.2919288127216	13.4692693964093	13.3866367450868	13.8541053097501	13.9597612998728
HCST	15.761554059295	15.6010540530044	14.8560275760794	14.8063694178394	14.4303014809095	13.9262105463016	14.7953625177569	14.4062822319231	13.8312087786829	13.6911242147436	13.9048236553905	13.8658596431989
VCL	15.5314448143347	14.1575654075305	14.1725901488103	14.8035393661681	15.8831826855789	14.5664624422032	14.3118400121883	13.2109421689876	14.5655128058755	13.0979216956192	13.2501596779847	13.3382679458924
IL32	16.2764769337076	15.6488447090561	13.6173353553065	13.2288190160039	15.3044688139505	13.628309738822	14.3809563146164	13.3563221287033	12.2862781681712	13.3468298974932	13.4149491997482	12.6530682656476
FAM83H	13.5162618267947	13.6660869480328	16.3834265380005	15.8360375185765	14.0671141373419	14.6775090895756	14.3453018993107	15.2972256263347	13.6536465079088	14.048242977122	14.1107054137601	13.9663136214555
UNK	14.0426163740809	13.905735278302	13.9699290336605	14.4614174011123	14.6745938315364	14.8637564943384	15.2252590508609	15.5187639418183	14.8159927132421	14.9602727292816	15.1487208365434	15.0881155922107
HINT1	14.1643410087341	14.4087138542908	14.9983754501405	13.8259380220828	13.907199841151	15.3801299902149	15.4183079985868	15.2332616827367	14.2401728184725	14.321157419484	14.3496183468155	14.8853971398821
UBALD2	15.326563220945	15.3109014724734	15.9964220935724	14.5041360486183	13.600352761075	14.9271981458328	15.1085634389921	14.8563380416732	14.1075172071776	13.9626128974479	14.0824656949646	14.3724553040089
PABPC1|PABPC3	13.5970618407146	14.4183518897622	14.5131772279051	13.4705409614569	12.6358031051248	15.7376102166435	13.7409427829067	14.5852551738737	12.6339404847274	13.4879665793018	13.8174077544327	14.8569171128446
MFGE8	13.9441877957492	13.8324	15.0206472649234	15.2893763250403	14.9343550737612	14.8756807219594	15.0297498790917	15.5111131520392	14.2396773346117	14.109162960393	14.2061442802961	14.6605969583104
AIF1	14.5841727307498	14.8635492920554	13.4227290284457	15.556801713692	14.3048160674252	13.6546566026714	14.9949282928652	14.4959697810207	13.5841	13.3746812973338	14.129661796231	14.3125431503797
PIM3	15.4621622272125	15.5152508475388	16.4138140307294	13.9952166624772	12.585075619404	14.6351762212945	15.0504868875309	14.8970419472715	13.9070162886954	13.8800600096806	13.9843781165388	14.4747008190312
ZFP36L2	14.6119612569251	14.6695118781582	14.2804820492956	14.5647357521779	13.5790177144236	15.0565423992669	15.1011825975645	14.907543304073	13.4048773744395	13.7230031226017	14.3470325031607	13.9935297287523
SEMA4D	13.9282757059798	14.1960399883356	15.3638727220149	14.6069090870389	14.7616659578735	15.0730209382902	15.236333316992	15.4107304263079	14.3818501083006	13.9167751892046	14.5552649133828	14.4185932779021
RBM43	14.0187707539387	14.1551822376065	15.3295079343302	15.7194292405451	14.547669802554	14.5334688581774	14.6608342899411	15.1566955214955	13.9393126189033	14.0285163380153	14.443636745293	14.484430445834
IQGAP1	15.6151263920705	15.4575493097863	14.2330015273154	16.189439370689	14.9737317792114	12.9656431632498	12.996856224041	12.5583591546549	11.4878061662599	11.9851236065921	11.9380368506649	12.2661827849775
EMP3	14.7389142085079	15.1306345057734	14.9353232662775	14.7939247440231	13.5800018184388	15.0978086375599	14.2879036696722	14.8090404144925	13.2939	13.5477929074787	13.9211613076259	14.5396899841854
DDX3X	14.7741579950315	15.2197380717274	14.860139916808	14.3141474238009	13.1925182484755	14.9063593765908	14.7135110322328	14.9944383239698	14.0309328259325	13.7950995212796	14.0182315252657	14.2560244419224
SF3B5	15.3852453571965	15.4048600030913	14.9352935108857	14.7162829606273	14.4664942361612	14.5044244557647	15.195078659081	14.8371960267386	14.1656208502739	13.8856657929512	13.8841840528984	14.2157591334184
YPEL5	15.1724133265804	15.0733064550363	15.3416828259722	13.7523304817106	13.6705573204375	14.7077352380645	15.1771582723023	15.2707726977713	14.3857367335191	14.1590733792444	14.0073739434822	14.4146216408838
TUBA1A	15.0682747198534	15.0345833042083	13.955330318087	15.6150932057148	14.6628761340084	14.1336626609988	14.2003116737463	13.7738230768223	14.1324643807571	13.1262846734896	13.9268450123966	13.657880119205
NFKBIB	14.6243777025045	14.5375073117022	15.5997729915369	15.3531760486005	14.2297812525387	14.591391384262	14.977539705978	15.1565898737718	14.3181	14.0266512383039	14.3076781446564	14.2608401516524
ARHGDIA	15.6352144813663	15.4664471549033	15.9908210002189	14.619042221821	13.9011098867091	14.5268026261748	14.7606316363392	14.1950783029489	14.0055104675728	13.6219328631561	13.7562883389231	14.0589443515563
SLC22A18AS	14.1620246577597	13.7858835805343	13.6986097806267	13.9721275664618	15.5779508938082	14.5779577937829	15.9726921730101	15.4623575018524	14.7438688927937	14.6028250431286	14.6191460280003	14.2012004592338
COX16|SYNJ2BP-COX16	15.4078405577495	15.4802175468892	15.2319586004374	13.4549502824009	14.305510362201	14.863550583233	14.0858025524318	13.3312679322636	13.7245308571249	14.1783119209307	14.0083335989139	13.8903872020574
CALM3	15.4080530460782	14.8314143888315	14.518509926415	14.7717508043147	14.9527064099934	14.673051107262	14.4375959665112	14.3388861769531	13.7863388728978	13.7425222915922	13.5061715192184	14.0215995693513
SLC25A13	13.4405888281021	13.7429523048739	14.6537038287626	15.670257837411	14.9047146040784	14.4286550058073	14.8315525380168	15.1318322408236	14.426361839779	14.1734736059231	14.5205902983949	14.7214062928016
PCSK1N	14.2243105765967	14.2603726197834	15.2549341311512	14.9949885231054	14.564796577363	15.0736235972073	14.9899478913123	15.4671076958771	14.1395642109366	13.8651343507944	12.9618485538417	14.5620855351285
PPDPF	15.5937462108465	14.9131392640217	14.6864250266476	14.0066241024344	14.2423194938645	15.3907979256921	14.8949711830968	14.2761506833179	14.0651728360928	14.8675229780016	13.7342117717395	14.0671755104156
LSP1	15.3078725705711	15.4004440027356	16.3489268338644	15.0896084803443	13.9129388045567	13.8721557282811	13.9375605409243	13.7508195871929	12.8699455949104	13.0641110287788	13.1542694178794	13.7840581051628
TFEB	14.7358702782591	14.6931477775759	14.9168161981908	15.4716562065057	14.677891509625	14.5654110837562	14.7892816174509	15.0278589838448	13.9787416298832	13.7897485018914	13.9538193716129	14.1347365834127
XRCC6	14.9383081118743	14.9474878866149	14.5435549742981	14.7340074129136	14.343867078691	14.7196155778171	15.1723324610247	14.9319658582222	14.025960694681	13.7981093118516	14.2934381273432	14.0085046171818
LAMP1	15.3554535957156	15.3053596577665	15.0821155097835	15.1400580456146	14.5969133226008	14.2218132443293	14.5598948506741	14.1563642803736	13.4837081856802	13.4304091159593	13.5546617459838	13.7944924343827
SUMO2	14.9175325922833	14.7159311300177	13.974453762352	14.7828626356826	14.8196471718459	14.0942473062124	14.9178053003547	14.3471801850673	13.788711794062	13.789198556437	13.6932371017683	13.9162752713073
PNPLA2	14.4729931624585	14.5907973048226	14.9811259643131	15.2933416973309	14.2637091420683	14.5981091632235	14.9366021416878	15.196240451193	13.9619180411546	13.900126967352	14.3585439410999	14.3836010175675
ZYX	14.6435985493387	14.7990562814935	15.4909778567008	15.6940157717057	13.6966515175134	14.2986669112933	13.9933492377865	14.4480006883133	13.2100659646741	12.9146780653755	13.450023961776	13.9517122822602
GSTM2|GSTM1|GSTM4|GSTM2P1	13.5104944296787	13.4931	14.6614593867096	15.8271883317744	14.499505882735	14.3900488202291	14.5857044290499	15.0575461381218	14.3911009873367	13.9368379408208	14.4691181049065	14.4841917338175
EIF3D	14.7171962192376	14.7178	14.5442184878313	14.535470184413	14.3610007984384	14.7609701855392	15.2975518467943	14.6965012344251	14.2753271498271	14.0767448673597	14.0268368531644	14.3897950144286
C14orf2	14.8341521735131	14.6141936593749	14.4196240473513	15.0923	14.0944028403103	14.4468693038116	15.0106686241311	14.9172206519578	14.0552580999865	13.6916392732743	14.1968646852677	14.223859709972
MYADM	14.8067573337721	14.8920351577607	15.6556363972002	14.5427795689144	13.1150875633937	14.8469817749313	14.2396845924208	14.7965968491638	14.4853712274689	13.6807101070191	14.4040786894001	14.3071552053934
MT3	13.6022711445964	13.9128650476035	14.7468085609262	15.2380262326549	14.9305023192342	14.8865877146371	15.1371725138109	15.5465777693614	14.5131067433341	14.2040692527792	14.5462368730227	14.6525468363751
GUK1	14.9115499251853	14.8802994557568	16.3370046459077	14.386909119705	13.6349353332229	14.3735027697424	14.6117395314331	14.4393419271954	13.8984617919701	13.4955714242654	14.1964189488693	13.8774486391232
ATP5G2	14.3381895504496	14.5013368778589	13.865117614751	14.4608409607879	14.1407140142911	14.344196078982	15.2944672393652	15.1592463278187	14.1132086250529	14.0421974825315	14.5707095870114	14.5231705756196
SLC22A7	13.7340147198828	13.526012254714	14.8347778211624	14.6778795534977	14.8116401080217	15.111746033619	15.1468341041075	15.5455561371791	13.8057718382015	14.1835526210631	14.4056648751022	14.6205955492555
HYDIN	13.4264771709282	13.8932174546367	14.9100490775165	15.4242246277349	14.4329818468068	14.7828622631015	14.5352269540191	15.4706530235848	14.0368388266856	14.1802007670913	14.5311158187239	14.6404939118338
IER3	16.6672993904662	16.4458398576578	16.8992192985477	12.2890553024626	11.7599661498796	12.4289459824108	12.825479560621	13.0159423265724	12.5057365883866	11.5193185655095	11.9356649279273	12.4265858819057
ANXA2P1|ANXA2|ANXA2P3	14.8312395065118	14.9284837555282	11.8904599104584	15.4949730152006	14.6992200994489	13.5415	14.500701079241	13.9456896515479	12.8255123913776	13.1432753181151	12.9492049475478	13.8136182225948
MZT2B|MZT2A	14.7909082725464	14.8277403706504	14.3983678977509	14.1557171167064	14.1284903128107	14.7664871344362	15.3196266387891	14.6415476524617	14.1547115489583	14.022679879123	13.9774188110987	14.2204959666376
TUBA1C	13.4376776070027	13.7375198341032	14.6319841325174	15.2627600216446	14.2998470773204	14.7748663881489	14.5257090096739	15.2744122916258	13.8150030601405	14.0297971959617	14.2677387717744	14.5263621099578
RAP1B	14.172769270621	14.1080084752629	14.5450766989926	14.0947178368973	13.8119891390911	15.3431414957924	14.1298983505158	14.5276301168976	12.8010937405524	13.4908442347134	13.6916917373526	13.9400544146266
SRD5A3	13.0987313688056	13.8778826616406	14.6545716355257	15.5078659628484	14.0620752747377	14.2924204379222	14.7253264287795	15.099588741809	14.6543815151663	14.3122853458125	14.6739641322329	14.4973217592981
AASDHPPT	13.508831036463	13.8188802407554	15.0242327808102	14.9990561644593	14.7882005929299	14.5685628639587	14.8377775340729	15.2922654425325	14.2921502393094	14.2812362983101	14.3068065889664	14.4830573098284
GSTP1	14.7974115633636	14.7678742888532	13.8739623927728	15.0744419416241	13.9176822712516	14.3894328562341	14.9791985550776	15.0191888099698	13.7607818510592	13.6243243433568	14.1664893377928	14.6064083590466
CORO1A	14.9330905338635	15.1854307440701	13.3199032031634	15.7395668441133	14.1251793832639	13.6606857512075	13.6516293623136	13.9672130370735	12.4425567919098	13.0836404560674	13.4050386554824	13.9510646890176
RPL5	12.9476550723319	13.6865847742181	13.6127284921911	13.2086770081674	13.0114239974074	15.4601516775806	14.5331132917368	15.0611627108638	13.9353403930775	13.9851169900418	14.6210663040382	15.0069224385498
LRTOMT	13.7996882491764	13.7004078174515	14.4999597980804	14.7013819436948	14.3811362720581	14.5771659459707	15.3560956831734	15.3200612066764	13.7846415366128	13.7852051637204	14.2071279676036	13.922190820698
TMEM110	13.8602673397826	14.2591710160172	14.9522143616652	15.1261985686409	14.2746408212687	14.6253632442528	14.4940124588427	15.2974652031232	13.9625186995624	13.7245140087298	14.3327269139164	14.5645149707018
EVL	14.8987840224336	15.1351762320458	14.0445422501325	13.887813541057	14.1075432718883	14.7235307765821	14.4418797594197	14.3595936634303	13.3155455342108	13.6172154411461	13.7359849292315	13.614425258713
FBL	14.5622298781107	14.5761001674658	13.9698128278021	14.1171784700096	14.2288403983845	14.6410469140907	15.2175387164265	14.9860796842084	14.325686063986	14.0079845871068	14.1990418614545	14.3202198036556
RASSF2	14.9373367734082	15.0299027541021	15.960746154787	15.4762269547989	14.0616056478388	13.7058786946343	13.5762493724456	13.6446441864617	12.5364528166546	12.5574897340147	12.6234322248995	13.4243347653388
NBPF3|LOC100288142|LOC101060202|NBPF11|NBPF8|LOC100996575|NBPF24|NBPF15|NBPF12|LOC101060226|LOC101060238|NBPF16	14.2693097569615	14.7323110391881	15.0330465546857	14.9776416928685	14.1529452415135	14.395931210203	14.5732409498811	14.3807017507778	12.9826101617576	13.4862711569355	13.4732692937199	14.0145918218894
MFNG	13.8654760262556	14.2227917420647	14.7760450570429	15.2271160469116	14.5115909955485	14.3579346584161	14.6263988677816	15.0121215382419	13.7546680630814	13.5526614806022	13.992559702033	14.0548914642064
CEBPD	15.0167314431555	15.6591306064124	14.5545222280123	15.3895104960552	13.688614198363	13.4485147561598	13.4011076337552	13.7089269421775	11.8042560049614	11.9975551383292	12.8108473597476	12.4596
RBM39	14.2321566322378	14.535218146476	14.4717616357134	13.4418880173199	12.9035358000737	15.1410671174704	15.3954370598795	15.3952631069853	14.0451802422475	14.3158216333529	14.4574260946942	14.570936069935
EIF4H	14.0381203241575	14.5030167847865	14.4828384145607	14.0970025301506	13.2856410630911	14.8619656720072	15.0907953100092	15.0748310471749	13.9292078412896	14.1494641684353	14.2997229020746	14.7243148144085
ORAI1	13.7690461055433	13.7128173458399	14.5498266290468	14.9520603530267	14.6201416168739	14.4186633125789	14.4387063842675	15.0559421515221	14.2265679748194	14.1335218526737	14.4804313718984	14.3774445812151
SDPR	14.7528341580628	12.699022498187	13.1166966975037	14.1899391037631	15.2852389220178	14.394506713019	13.9662025902462	14.0142645863802	13.8110064090346	13.3821764501737	12.9776141116468	13.5680448511758
BCL3	14.5299465889246	14.9418532129597	16.2563750961031	14.0080816498358	12.2606946235503	14.4142795548909	14.8326016144096	15.0526720481156	13.8933256409983	13.5480367261928	14.2638204409424	14.2898114496552
SMYD5	14.0720941817651	14.1231262411772	15.7116425211494	15.5128370505829	13.7290998805989	14.261978120246	14.2054499363081	14.5095724531155	12.5543609765952	13.3489771539101	13.7380281773663	13.5514500624245
SORL1	14.9780955249727	14.9966789610462	14.6826367104513	15.2557729060334	14.3012401203239	14.123115607504	13.9225308413873	13.7079660159827	12.7988532313212	13.0204970190225	13.1024493485017	13.1978639508419
LOC728026|LOC441454|PTMA|LOC100506248	14.7374268674165	14.5467793410567	13.0157363502683	14.0050434298986	14.5832773542142	14.4865977490938	14.8925140758242	14.3131455554717	14.7097512035609	14.2389713292335	14.1000478071238	14.1881064172144
ITGB1	14.7914621938282	14.3413488844703	14.2760715786902	14.2749305888893	14.3441084570533	14.656817873749	14.1467725151991	14.0638539825095	13.2753384705765	12.9787826242246	13.561831337118	13.2451198580698
NBPF15|NBPF8|NBPF12|LOC101060226|LOC100288142|LOC101060202|LOC100996575|LOC101060238|NBPF11|NBPF24|NBPF16|NBPF3	13.7028304424407	14.4747066087593	15.3241546212009	14.598790139539	13.6598929652179	14.578710611234	14.2122278284778	14.2537069881844	12.9105630302342	13.5118290108284	13.4770258053117	14.1410342166183
CD99	14.8212539282031	14.3389447687211	13.729344124018	14.1320159874345	13.6348564138245	14.6443	14.5935644108734	15.1214229187571	13.9208873277672	13.5310335487278	14.0828944718683	14.0385650904747
MTCH1	14.5256444966631	14.7867283920728	15.8218782378286	13.5553973868164	12.7737941197082	15.0913979303963	14.8485350367249	14.6363546682475	13.4147139956198	13.6898725914495	13.8976516129729	14.0524381548565
FOSL2	13.9287497069983	14.0796474170252	15.6612962893753	15.3433944506976	13.7660323232075	14.2358320745495	14.0671064826499	14.8861237984958	13.1866073803318	13.3303865594265	13.7884538401816	13.8738085940181
ATP6V0E1	14.9710942583618	14.6768337802237	15.203975131172	15.1094064856919	14.8596371035513	13.502368128311	13.5372435564646	13.1440256023253	12.5345689249861	12.4514772851217	12.6023519442191	12.6153091173291
COX6A1	14.4140372317092	14.4333450573606	14.0521359595613	14.668769726894	14.4619193945123	13.9619529301078	15.0104111212512	14.1689192344818	13.8864840407674	13.7905730287335	13.8890346109637	13.7735965942562
ZNF93	13.6773884212175	13.3235366087094	12.9112961224044	13.3271704041655	15.4094157428535	14.2887444713858	15.8910409987023	15.3808496383938	14.5737920425648	14.4785443703546	14.5382858407697	14.200510430164
MAP3K1	14.1586441750612	14.2874648466686	13.9616550956011	14.6859839725454	13.9736069484251	15.0346492984123	14.6562659742735	14.2008617274371	13.1235527517863	13.7702352179174	14.2589905212541	14.1803914944576
ATP5I	14.9756030673783	14.8397860100814	14.1460955610928	14.3991809419373	14.3406770918069	14.0436374931603	14.9725781199248	14.2355838926876	13.9206812749519	13.7354030256054	13.5353667986893	13.9254472499549
ATP6V0B	15.0973171436625	15.4314246635895	16.1156931037438	14.2331644969848	13.3135200970352	14.1707500704717	13.7859869816412	13.7731800869655	12.4041613097177	12.8683078310772	12.8930982070864	13.7258858391812
LTB	14.7488803024361	14.9383347715249	14.443587202818	14.4920778455753	14.3505143448694	14.7384989575086	13.9531321321929	13.380828058749	13.0773455430256	13.0540746136193	13.0593049683663	13.4073762013302
NCF1C|NCF1|NCF1B	14.4606722043558	14.9742659413566	16.9350465156029	15.1202017447024	12.4680453921773	12.6888818514098	11.1437515389291	12.439387329634	11.1438942068125	10.7364677288892	12.0980427306951	12.1941626694677
R3HDM4	14.498880836177	14.6281517348373	16.3716003006699	15.2386989208135	13.5020175204607	14.2906071890931	13.397961313366	13.4891672940375	12.9140865317801	12.8206666736749	12.8803280722315	13.2669313992675
POU2F2	13.3125041740141	13.6585348967628	14.782212404211	15.3061605693379	14.4241039754366	14.2461724692571	14.6086808393202	15.1051650222473	14.1447780400124	13.7480510317779	14.3322761617593	14.3550352017974
PSME2	14.4104780778181	14.3088853879516	13.291545673579	14.8707418676981	14.3611439210581	13.4452585232853	14.9149466470405	14.3277319509499	13.2281624298514	13.1651635436535	13.804791549442	13.4102688591802
WASH1|WASH3P|LOC100288778|WASH7P|WASH2P	14.3879891087783	14.5499576125597	14.1383615897829	14.594955967364	14.1394907312347	14.2131869230766	14.9859983000788	14.6831167556479	14.0435725867709	13.919353317304	13.781998637769	14.040798635096
PPT1	13.5388707366008	14.7749088086202	12.0990679428342	15.5138634164106	14.4390510213374	13.2810527507464	14.1195254931423	13.786714086524	13.4141286141155	13.1957784583412	13.4247075601572	14.1235150343895
SERF2|SERF2-C15ORF63	14.5811983906889	14.4472914705644	14.171428499702	14.4157945343451	13.9357331186546	14.2934555578131	14.0214263832415	14.2568	13.2667717955912	13.2686026385627	13.2482495048975	13.8125728670675
CD63	14.7408724553354	14.883062339013	16.4363390396805	14.1541271552896	12.7619911003168	13.7962823930424	13.5310098602025	14.1072472019996	12.6185243389151	12.6462560690787	12.9810687358957	13.3882398590631
GLTPD2	14.0457880671474	14.089561928148	13.9871398852112	13.4495965349759	13.9155398957904	14.7747821626025	15.1906762081495	14.6500779230978	14.2409982464412	14.1853301307169	14.3168206170703	14.3974210742592
KLF16	14.1769650088927	14.2947005708794	14.7373167911277	15.1021171160632	14.4336171353676	14.419611732818	14.5917067026622	14.8136038425393	13.9716976143109	13.7464229636553	13.9360112896028	14.4009661534399
ARGLU1	14.4341250488658	14.5774728139851	13.7740188938217	14.2152409328829	13.5004590665447	14.6502767612393	14.7930290450467	14.5250954235688	13.2996286143137	13.6331614938203	13.793571091101	13.9834312635965
TGIF2-C20orf24|C20orf24	14.6117029784013	14.5714903995384	15.6628785258235	14.6107916111791	13.4184758224775	13.8059093575128	14.7064704447483	14.6130087916408	13.7323005030542	13.6253260432347	13.9280983938328	14.066816876499
SPOCK2	13.9632848734391	13.8306886893394	14.3345496757357	11.750542803965	13.3438670405315	15.5382512970067	15.1349300628639	15.0556966788202	13.7791966025202	13.9373964462697	14.2631584672245	14.3264583554815
SNRPB	14.4699838381119	14.6769376154048	14.3494539306147	14.0282144692065	13.2461992670814	14.7205953743293	14.8360930369501	14.9928217526881	13.9861453272367	13.6928158611238	14.2807858406484	14.0364094902251
LST1	14.7845392132368	14.9307496474425	13.942715384622	15.7517805048773	13.7122939031781	13.3490661674529	14.3469343983256	13.4856391941922	12.8703724189458	12.7590947390599	13.1931156001786	13.6457651390401
GSTM4|GSTM2|GSTM1|GSTM2P1	13.4036415189851	13.2920668348457	14.4799037926605	15.7029118106354	13.8965748628388	14.0571085325869	13.8838634204269	14.768274997048	13.4892767563436	13.443574323231	13.659282059964	14.1371678434092
CD81	15.0875861819285	14.9527290398202	14.2184031989549	14.2558866428757	13.8849422937946	14.3695818471743	14.2227132668065	14.4339472796007	13.2929576503449	13.2925678924245	13.7832524154676	13.4187873022007
OGFOD3	13.5398794659566	14.0049099189105	14.9108059120649	14.3451362431539	14.1402137057486	14.565839507577	14.8937989947259	15.1421492096345	14.2479953843607	13.5260913132435	14.3471217468318	14.2125205340228
ACTN4	15.1926	15.0166173903845	14.7443310771429	14.9369947930514	14.1945008618212	13.6543270141462	13.7470758898316	13.7985	12.9774683675256	12.8337922753425	13.3083377771673	13.1771910568976
WBP2	14.6295988147212	14.3471894690665	15.9142963371028	14.6335551259014	14.2504808412605	14.006102345256	13.8091476052695	13.3407840597751	12.9149143419514	12.7143175213799	12.8285976759047	13.0948470865042
LRRC61	14.1939227861039	14.0666030060668	15.1669989294877	15.296600595721	13.9315628271557	14.2598854918779	14.077665107628	14.3012801217879	13.2387801170866	12.8462709172256	13.2768273003233	13.3466958452991
TUBA4A	15.1799239063236	14.3971634163325	15.2707501505351	14.5405150999334	14.6927522156337	13.7121906372489	14.1021343685205	13.6449454674321	13.8275865731238	12.8858	12.912526467575	13.4132184242221
ELN	12.9301251903487	13.3873682805641	14.5700903095528	15.5009163596283	14.344928841674	14.4920386053416	14.3519834373547	14.9560223204938	13.8647987855373	14.0231476658627	14.1692176593787	14.227786072731
NFKBIZ	15.453499983196	15.4801977134984	15.7928261807922	13.1498117083477	12.4245148195295	14.1291105200427	13.8010717030246	14.3945942112766	13.0072717458336	13.1197382171614	13.1977749315763	13.2921046643182
CTSA	15.1512951380214	14.4984021174067	14.8107795664536	14.8093332669417	13.9655968222149	14.0902188161546	13.3597411898671	13.3360027433834	12.8191147577632	12.2861221226449	12.8127873550751	12.8118698300651
CKAP4	14.9018050435811	14.8433370016774	16.0535046271781	14.8521289854862	13.3874269987039	14.0773007035101	13.7212530587134	13.8811705323735	12.7200550056766	12.8109467037624	13.0989558532314	13.4474774164168
FXYD7	13.7561507066297	13.742687780197	15.2111449410225	15.3675832792549	14.0326653808633	14.3426968176356	14.1371812716742	14.8022806487947	13.2734032961234	13.5251008309772	13.7372793226247	13.8665924120319
ATP5B	14.3622956761867	14.4743481961907	14.0999601896162	14.4263258838087	13.4777582386219	14.5143055702611	14.5868792516508	14.4359508742877	13.2692014917326	13.3264121134413	13.9585585614152	13.8439807751157
LILRB2	14.5249001068997	14.8347378448878	13.7156188901748	15.746187069422	13.767616831371	12.7430624476221	13.660452660912	13.561491173259	11.7616358889843	12.1977174646847	12.748295010799	13.0453044529002
PROSAPIP1	13.7575521773853	13.8773405699053	15.4826945416689	15.5909201119283	13.710497643688	14.1965327155165	13.962906138861	14.510399430956	13.2314888589242	13.3608690686549	13.4782486437639	13.5550343696516
FXYD1	13.7189522401669	14.0149116277775	14.6452152427448	14.7088330174545	14.3082842048373	14.7573770846448	14.4736090670429	15.0722010698305	12.6918369587791	13.7745480635899	14.2003762314318	14.3519968272073
C19orf43	14.9206338018502	14.9053906089305	14.3172537792504	14.0406711233536	13.5336003375811	14.4088841787482	14.5989519774093	14.4277446588306	13.4307196267713	13.2541296733803	13.908154412871	13.6864853626103
GADD45B	14.8664589234894	15.0756974087092	17.1519363889409	12.3672318747838	12.0073	13.557616198466	13.4446029592219	14.0244509948285	12.5918551584023	12.3430601272101	12.6039959752547	12.8062472178065
CCL3L3|CCL3|CCL3L1|LOC101060267	13.6251174645855	14.4598979766524	17.6791606596256	10.5310305358849	11.3701792565771	12.6372640725534	13.2551277965532	13.4077089152686	12.9093173840259	10.9002494506786	11.224172312855	11.7377314647293
IL2RG	15.1554271414583	15.3032087107785	14.4581574525412	14.2092341848388	13.8080048538634	13.6655273358595	13.5829145870941	13.1628023290851	12.1217864676596	12.6257652940235	12.6848856528509	12.4416627349182
CCNI	14.0971914237944	13.9723401284345	14.5222390460727	14.2760400647766	13.9482356608875	14.4246022096732	14.5123866184515	14.3295761625983	14.2195496375306	13.6784846066412	14.1722430891159	13.8749470947631
MAX	14.8807382043343	13.7184107170094	13.9638739020308	14.8226130088495	14.7467351922407	13.7440999908592	13.8314175984276	13.2619864147744	13.5873004575459	13.1301983359881	12.8270628105242	12.7964747796587
CD37	14.0911696715796	14.702324743774	14.4440055442782	14.7905056119218	13.3019360984528	14.6349906369463	13.7536138765684	14.5954754120746	12.9405	13.5069040511114	13.6812524004484	14.3936130832398
ITGA2B	15.6827431366189	13.279083537094	14.5957699190349	15.0219020013709	14.7805874088389	14.5393906841287	13.0843045606479	12.8241421265875	13.7480638117327	12.2946717930891	12.1856878855504	12.7013080196785
PCBP1	13.3623057532367	14.044721928072	15.0342695294255	13.3876768216315	12.6575640979695	15.0041082685351	13.7213789241275	14.354567400393	11.9328313948146	12.9349562589136	13.2726987132753	13.9307
FBXL18	12.7956159841969	12.8265553960835	16.190873478151	15.5503345449115	13.554361316699	13.6136922116262	13.8333987325127	14.5431496139863	13.7156506225099	13.8444388489847	13.7609849684444	13.680872001325
RPL10L	13.9758390254546	14.0086549393588	13.6735705491764	13.706233241894	13.8742852176525	14.9818946685672	15.0691509344661	14.6686194553159	14.378553227342	14.1610407005163	14.1353056461259	14.4731680419797
EZR	14.6175949604749	14.5213292482946	14.9174791171933	13.662630315145	13.8200636868352	15.1339140135687	14.5179042664103	14.220063932852	13.5717687078518	13.7668873617734	13.7622571336623	13.9650739621258
BTG1	13.8894767605202	14.4735912565214	14.410534243136	13.2435368733888	12.8822853433061	14.7874449130896	14.669992965876	14.7885062744744	13.1498096469467	13.449677211648	13.8554234764552	13.9750040141265
CAPZA1	14.1078002069259	14.5142181102804	14.6377373943057	14.6916263188804	13.7146107652466	14.2574523057937	14.0171777203611	13.7456314920444	12.3707623084125	12.748666628957	13.4640818921987	13.0008577784879
NCF2	14.0855478584423	14.4463171614514	15.9203071630675	15.2306058862164	13.0853637913714	12.5127830680892	12.7608188368717	13.018037272373	10.985848280437	11.3776209512854	11.9568731392553	12.8255957205415
GLIPR2	15.1026570812625	15.2591786774689	13.703579873517	15.0709594438152	14.0384046032193	12.9445328129828	13.6651713448436	13.3595688649028	12.3803840384861	12.5235066604266	12.6882711408434	13.2554375439288
NME2|NME1-NME2	14.5486092138417	14.4478189467561	13.2984098914073	14.1930394394185	13.8303005158421	14.1592333052332	14.9253916935812	14.0813236775692	13.4506942278523	13.5763625321815	13.2653506914698	14.0874324057658
DDX39B|ATP6V1G2-DDX39B	14.5504199154132	14.503172955885	14.0264990051959	14.4497105278385	13.5643408023425	14.6075601758288	14.4520030763337	14.4434757522531	13.7673282699814	13.792632286551	13.8986261856373	14.1792491221973
TAP1	14.1941199477168	14.4301453268416	15.3494747738477	14.4381782220075	13.5956568519559	14.134345557843	13.8846503844316	13.9279313837643	12.2117747940168	12.6229904951997	12.9309822667289	12.945492600402
RTN4	14.897392225556	14.4543356041159	15.1890536227521	14.5738684689604	14.0164609067664	13.8206058029421	13.7661746501409	13.4096606060629	13.358927028144	13.0721580062317	13.3340507567417	13.2719183444589
ST20|BCL2A1	15.088912182706	15.2457079658751	16.4360551679531	14.2951698154232	12.7128920998805	13.2634882972997	12.3151010024076	12.6641071535454	12.075151494825	11.2147529084663	12.3146847799231	11.4523448430159
ALPI	14.0537955767372	14.2871927996469	14.6105288594507	15.3207982569518	13.9963913797125	14.0633007384201	13.8669528028729	14.583474882855	12.7748874228478	12.8380524523099	13.2672383704429	13.5218109633766
TPM2	12.8190723798408	13.1718643077591	14.1156432091064	15.0507702872088	14.0197889246065	14.3307608929824	14.703415192469	14.8416932990523	14.0189515461979	13.3722966326524	14.1625392973351	14.3451780750573
MZT2A|MZT2B	14.0760044015991	14.1975848536408	13.5225982224338	13.7613613759116	13.8149179045712	14.3663211574986	15.1831336549557	14.7031713063974	14.2452006000973	13.9100251220034	14.329388007973	13.9726236234225
HNRNPM	13.8812963370485	14.1623199711822	13.8523153676063	13.5381818992608	13.386958483611	14.4280338870254	15.1000213844063	14.8578983404617	13.5704558711823	13.7981776437901	14.3129878325378	14.4640883330344
TMC6	14.7447473430901	14.6777334387776	14.996380260028	14.0866	13.8561209450311	14.4416795464603	14.245297623631	13.7784990900113	13.4636229114946	13.2697857652407	13.9088196425919	13.3638595575724
GDI1	14.8787463663269	14.7033445884177	15.7483155955929	14.153743108857	13.7935837616452	14.1284251401126	13.7779010428306	13.6410742384325	12.7435439980457	12.8815249896934	12.7453185362828	13.1100881585631
AURKAIP1	14.7236299226138	14.5708200140754	14.7593006552179	14.4480111588515	14.1261341592742	14.1544246505001	14.2392451532229	14.2801000647585	13.2486637266179	13.5359589113975	13.4475288684992	13.6635834779046
EDF1	14.7604099654804	14.6485565029077	14.0838363883933	14.3349610778931	14.0130644728201	13.8388327592755	14.5325395613251	13.9842193730882	13.6395678474015	13.428644643752	13.4369182420561	13.7262391353183
PRKCB	14.5887914945184	14.5159991836926	13.681965338783	14.5808639236143	13.7228762474881	14.018049401825	13.6967530767098	13.7710653844125	13.0319004454271	12.9603371616482	13.539355843569	13.2690113884198
FMNL1	14.5810099348833	14.8237756482524	15.4157248668893	14.6224165355873	12.9124179710602	14.5147090939413	13.6190328065725	14.1614274602874	12.8283711125584	13.022253090629	13.0827544738981	14.0102049930823
DDX6	14.5999951417805	14.2926240148417	14.5451156966004	13.5955398051895	13.8303005158421	14.6693587958836	15.0949786333183	14.4325809169582	13.7420123960344	13.6818956383059	13.8827687944693	13.6302072667318
OS9	14.6578211735853	14.8296719535068	14.4535109630499	14.8967439612923	14.2253	13.4833205403447	14.1521980561383	13.9113717264875	12.8799427247728	13.0865527966598	13.2237676874226	13.6497083558349
ALOX5AP	14.7688	14.8507504131632	16.8681332175382	14.1818899613827	12.8277	12.2618961556642	11.6743100257504	11.9435100904873	10.8685407704595	10.7663931654799	11.2865542443848	10.8255617667862
KCNAB3	13.3378875455339	13.8420926351048	14.6033555447902	14.9475097044443	14.0777200944729	14.2696013152501	14.1993179692499	15.0227288265656	13.7272432135834	13.655435363944	14.1262856578859	14.4377652932837
PTPRN	12.7080331899013	13.101	14.6078057063165	15.3342483103189	14.0605484269844	14.0897	14.0443466093716	14.8286676496246	13.9045177789581	13.6793010226668	13.9701360737997	14.3148605059392
CSDE1	14.4815394961456	14.2514755529205	14.0453144514943	14.0367490506593	13.9278314400485	14.7241590153267	15.049183852395	14.3707784202594	13.592354528929	13.6948725826411	13.6623695160081	14.0070099490166
SLC9A3R1	14.9428617316282	14.824338240289	14.6367496122618	14.4322189862055	14.1306187606914	13.8733519445444	13.8485169240713	13.4653682718839	12.7689477096581	12.7863563536017	12.9904693848914	13.1946578331517
DIAPH1	14.9058132248704	14.5614017569974	14.1919971634803	14.7862999077922	14.1933759534391	13.8020795010486	13.8599383060242	13.4013030403729	13.0782695607717	12.8502308489423	13.0383449049669	13.1740866120008
EIF5A	14.0482440697152	14.1645432899695	14.4963339285157	13.6559824561244	13.8242917236391	14.2437890488449	14.9859197216368	14.4766910394151	14.5046082399704	14.0833767444108	14.1128065246538	14.2414094861961
ANXA1	13.5795100695455	13.8552435160157	12.8337310106815	14.0890476123657	12.9258975674464	14.0892979845274	13.7741443963528	14.0469303207802	12.7412122338536	12.7752913117562	13.1626096666781	13.543968346969
ATG2A	14.5685170991329	14.4682815250909	16.9603436207105	12.4110439434439	12.1245611161689	14.3428786290342	13.5506936162823	13.798001600112	13.0391318806416	12.7285857601724	13.2028138363558	12.7208907362654
UQCRHL|UQCRH	14.5843607744737	14.3283628750207	13.8740244882584	13.7858556348666	13.9137846732166	14.1093415810038	14.4685940343964	14.0506872727504	13.1599705735071	13.2608885743238	13.1289554184204	13.728306704441
NTN1	12.9662449193674	13.266718421368	14.5588936164582	15.286526504441	13.9400191462641	14.1687002369372	14.0414762127411	14.8747371035035	13.2039830127587	13.4391992550567	13.9101491825238	14.1348886570064
TUBA1B	14.2981199384864	14.1179346106072	13.3445806081739	14.4046786106827	13.858015312167	14.0318731297343	14.5394093170363	14.0134870044454	13.1869500981112	13.0548755259177	13.4504393920906	13.6210628007489
RNF126|RNF126P1	13.7026225784579	13.8802894928453	15.165020969536	14.9789739659344	13.6400558887529	14.5487207615654	14.0773701223854	14.7479196044295	12.9865529554657	13.2968300052823	13.5654	13.7044257066603
PSMB9	14.7928948848836	15.0346643362763	14.2740024612291	14.5487591057966	14.2025637641894	12.8784048629359	13.260594571456	12.8496349135418	11.384615432148	11.7470680564983	11.8785247395335	12.1014931065597
TCIRG1	15.1079250057499	15.0191313838537	15.8496780826753	14.9393522189879	13.2653923781527	13.5942361999844	13.4082400525611	13.2838835668019	12.4292922354746	12.0311996093288	12.7473486167991	12.5668738093862
MNDA	14.1909621178264	14.4058766678919	13.5739587674538	15.8468874686863	13.696046486502	10.7126143221161	10.2121189990424	10.3108005753875	9.42144452426089	9.19666529047238	10.2840905702036	10.059593281951
PRKCD	14.4628830290404	14.4774912230076	15.8659108770078	14.7194746463366	13.5475020828697	13.1467093711027	13.3444592700077	13.1275907170022	12.0478640109354	12.1964737092701	12.2754575148843	12.890441840722
CCL3L1|CCL3L3|CCL3|LOC101060267	13.1942791241791	14.1632591238469	17.5928797858845	9.87700187319269	10.6586509735575	12.3936642828634	12.7941099112797	13.4053989628157	12.1264395872033	10.6372866928137	11.2798377533954	11.4998771766871
EIF3F	14.2496202125796	14.0682927979369	13.6599500183674	14.2536867842094	13.8318848732746	14.0685872719626	14.8721950312815	14.2608995098104	13.9076402406199	13.6002292568801	13.6062804798881	13.9636620177466
PCDHGA11|PCDHGC3|PCDHGA4|PCDHGA9|PCDHGB3|PCDHGA2|PCDHGA6|PCDHGA7|PCDHGA10|PCDHGB2|PCDHGB6|PCDHGB7|PCDHGA1|PCDHGA3|PCDHGA5|PCDHGB1|PCDHGB5|PCDHGC4|PCDHGC5|PCDHGA12|PCDHGA8|PCDHGB4	13.8476014917444	13.9232898379792	15.1180815228352	14.8270928485307	13.7643017805464	14.201002698717	14.0993283562461	14.6285553654458	13.1664153545519	12.9819142834218	13.5494743865765	13.493804811457
U2AF1	14.4002604165381	14.6754139464201	14.7869031255542	13.7681872449079	13.2054362399025	14.611451601019	14.8454778899148	14.4931835892195	13.8503750956975	13.4291742124355	13.9853531866301	13.6746092098871
TRABD	14.4798423608386	14.5465520534278	15.2824233848508	14.1184160890502	13.203947500061	14.8336692050719	14.3051374618026	14.0038883000521	13.4234663450197	13.4529794300211	13.438510630863	13.9750464846621
SNRNP70	14.927231473023	14.9188577153786	13.0704089776344	13.990493137575	13.8868654899706	14.2157951302424	14.2448598910775	13.9350116666838	13.1750790288711	13.6073441533828	13.4975939907878	13.6291820778041
FXYD5	14.625145623813	14.4799927889006	14.2390890472774	14.0615276418209	12.8947304368877	14.8401557142258	14.0268342567368	14.4975555065408	13.1773230880167	13.242727047795	13.8677308433169	13.8420260433802
IST1	14.030301186998	14.2142316107383	15.1065269654468	13.8005092417986	12.7046442489179	14.8645640136388	14.7573208290848	14.617416616515	13.6792073966735	13.518646070027	14.0784934538245	13.733487808519
C6orf48	13.3689576669336	13.2166463609376	14.4049582001016	13.077145196346	13.7214647903599	15.0439749216542	14.6137750621934	14.6638700977547	13.5043429190209	13.3720212243829	13.2751397606881	14.3647930210275
DAZAP2	13.3066806947173	13.9272	14.4738936732652	13.6444697400582	12.8407388945871	14.6601594179503	14.1786572205112	14.718091026403	12.7787579014372	13.1238877539181	13.7852957167531	14.0643039363673
SLC25A37	14.2185554059311	14.6909215103716	16.0544227419733	15.7268248057544	13.0757446292492	12.7535628758938	10.8548184341432	12.013781304953	11.4362685922695	11.6889965621377	12.1466384497096	11.5918169661444
BCL2A1	14.946289485966	15.2016883605151	16.3243356585922	13.8162640246263	11.7389726388613	13.2596414753761	12.0122023700914	13.0856652547229	12.240455290844	11.2040653267887	12.4539564156307	11.5078840409233
EIF4G2	14.3292861321506	14.2242135062291	13.1747123664221	14.1233559747075	13.9594338677088	14.0132310398373	14.308995232459	14.0603194555057	13.1122291782477	13.4305854446778	13.3172938833312	13.8715288936393
CXCR4	14.1716683672863	14.849123342267	16.3102356413853	10.9946743682754	9.75183757616302	15.3561922380071	13.1496455108582	13.9801656494741	11.1030734729295	12.2728085240525	12.9462623255441	13.4439221987354
MLLT6	14.4413684638622	14.3525298683962	15.3695434605989	12.9876300074026	13.5920842150152	14.056942304121	14.4201773805597	14.2230266103602	13.5649288719476	13.4729780272789	13.4755570307045	13.4897676719252
PLEK	14.2512318330302	14.4560307710162	16.0963959191881	13.3189729457685	12.7755133196298	13.4124587229888	12.645498482966	13.3441896106684	11.2161941467543	11.8269367777938	12.8229618349493	12.8877371607246
EHD1	15.1128348701284	14.8021059969426	16.2828319189804	14.4102	13.1262463999419	13.1616796474649	12.479504245418	12.7540906115978	12.6246093789149	11.7196238241821	12.3698396523512	12.329871107849
ZC3H12A	14.7696670324927	14.9211095428304	16.2439118091313	13.2435368733888	11.1171226042921	13.7929925400324	14.3685129588044	14.6609930987732	13.7764664098036	13.3414946210685	13.6110449524649	13.4504130537333
CTBP1	14.8713987947682	14.7976245051554	13.4832482404404	14.2459864923512	14.0193657848668	13.8811971551565	14.247222071046	13.7965107314738	12.7502848802905	13.1329099241355	13.1093058318762	13.1718650544013
PPP6R1	14.5877413676465	14.178740853453	14.4029369294237	14.0167358064545	14.3777447967443	13.8504205103087	14.4727868987468	14.1277276322323	13.6705330992197	13.5650827970646	13.6144597246249	13.5086095488038
ATP5O	13.9740030412505	13.9924485463781	13.4349871641295	14.2926803018532	13.7778024603864	14.1316120288341	14.7700928919011	14.2312430677712	13.5330680582593	13.4290859638323	13.4456963867278	13.8106702794576
PTBP1	14.8988445047706	14.7711202650345	13.7177655971118	14.1688085903461	13.8233224487257	13.9666504035716	13.9735657619084	13.8287823443999	12.5038121297007	12.8344587577909	13.0684274653282	13.0842549752471
SIPA1	14.7621398063237	14.7447805436042	15.2946293410713	14.9608052350225	13.7183398181412	13.5124249399786	13.4238702224588	13.4486678359025	12.728555165815	12.408975634259	12.7449121772443	12.6394127577118
MAP2K7	14.1384493810657	14.1707012586784	15.1791367884755	14.5104489858326	13.6326449024686	13.9777862270477	13.9853006710028	14.3105523831601	13.500349826939	13.0304199469988	13.6687389183997	13.5575324242279
CSNK1D	14.3366275994128	14.6437479475188	14.8757289969148	13.8530230983873	12.9169684484764	14.3977043875582	14.6533003374403	14.9924666529064	13.6838286397448	13.4932097650242	13.8388274550919	13.8983368923709
SUMF2	13.3731431274705	13.6032959197865	13.7833721865031	14.6205914165556	14.4211782642789	14.022085562538	14.3400654545806	14.9239398257392	13.7338259677614	13.8652648069632	14.1656799539672	14.0439602884386
PHIP	14.2604874078023	14.0596116177663	13.967835901066	14.0161323055711	13.9854155729175	13.9996303166292	14.8633251676345	14.1112866659354	13.6690618542164	13.8274651474819	13.7092948375889	13.8457470629893
CTRB2	12.4071520553031	12.7627635138338	14.3092394393732	14.6036589547641	14.3238374275654	14.2872336687439	14.7627123272956	15.0063293512367	14.0313145882659	13.8277329482965	14.2086513594971	14.3306799032733
SLC35A2	12.2726597885226	12.4444074637295	14.2721188666152	15.3968079482111	13.9153449767924	13.7437213701525	14.1964232945575	14.8928621891209	13.917173862202	13.6303241387986	14.2744647691362	13.8643471298738
SRRT	14.0929153968434	14.2358194164174	14.4975435645151	14.422049672081	13.3005437276368	14.5112350966178	14.4632605030034	14.7206897605565	13.7833955534302	13.3199539904329	14.0192960012116	13.8396488739342
ANPEP	13.6367690617944	14.0490071108313	15.3479555139685	14.4555535824879	13.9052381470147	14.0484391426795	13.7967778527812	14.2817801273541	13.0368521830831	12.8311232623236	13.3922080223077	13.7779850664693
S100P	12.8601573667293	15.355524236284	16.5058104305345	15.3603738739191	14.3345188682879	12.5085752735338	10.250303264785	9.89731327801943	9.95490263336158	9.05379432074567	10.1415355871058	9.42615007350271
IMPDH1	14.4530722935429	14.4586503242886	15.1449363916285	15.1681717814204	13.6990691052252	13.0556911879083	13.6280570993973	13.8163525850887	12.4425567919098	12.8011608021608	12.7172839450687	13.2825273492274
H3F3B	14.1596541043371	14.4300221180705	14.2572465991462	12.8287210504491	13.4367893529305	14.3840098359657	14.8203734208903	14.4125776139718	13.5540766543867	13.775936558971	13.7223576282854	14.4517195335934
SBK1	13.449700321718	13.5655080732234	14.0329093664334	14.4987892859599	13.6305883153337	14.5559926366726	14.3307319474535	14.6915998967031	13.6366853730829	13.5638776190308	13.6943599648488	14.0683703155815
ATP5A1	13.7438125865242	13.7866536103637	12.5787721764736	13.8847753767287	13.4432932810791	14.0212337923643	14.6186486513695	14.3826902964923	13.1214027218461	13.3956065013512	13.7253131422209	14.0263618633846
MYL12B	14.3017840172257	14.3911001896396	14.2442865550552	14.0712049329961	13.6829765794987	14.0984799547778	13.9286487393305	13.5438280452732	12.3427369325108	12.8683078310772	12.6487051554853	13.271365089982
AP1S2	14.2316765059834	14.044185383959	12.3709624245725	14.9651266111863	14.0045993224409	12.9882517524259	13.520198446704	13.5046335191507	12.2241840236693	12.3649992770413	12.3073645861543	12.985929350079
SRSF3	14.279844429871	14.4404574471248	14.1271513245551	12.8222453454173	13.1407695492975	14.3618424642914	14.7377615463856	14.5594098997541	13.5575264471763	13.6022656667516	13.9679904901865	13.9365255194202
SOD1	14.2994492424495	14.0077746327396	13.4116497189258	13.422981036024	13.9490610924633	14.1975635464509	14.7960199947786	14.0876174917259	13.2833738731663	13.5784328877114	13.2355785315147	13.5527596509207
FCGRT	14.6441398475789	15.1096333432638	13.4895843874324	14.8111086585368	13.3223679990808	13.4736808484577	13.9214356241336	13.6475038213904	12.248686790811	12.5128872182072	12.823475094786	13.8265745753269
UQCR11	14.8421632715528	14.6476384586606	14.5154082161488	14.0071708553987	13.6533628120547	13.7827427076857	13.8671803446298	13.6086438246862	12.9409533648595	12.8212047565851	12.7194917181809	13.1964075078509
C16orf92	13.4715799578153	13.5224725894451	14.7913813941021	14.6135470607546	14.444554571235	14.1926037819229	14.0154850100745	14.5334729001511	13.6521579320225	13.4062253845384	13.8031010227974	13.8596160317801
HNRNPH3	13.2408303782941	13.5417581281514	14.5445696359507	13.161865788029	12.4782860814368	14.8072957779968	14.9234783179125	14.3926818209512	13.6745713021441	14.0064476486896	14.1857795519738	14.2009099607014
PSMA4	14.5661959239625	14.1068785077376	14.4225139374931	14.5590293796788	14.2619728014834	13.3055130789731	13.6996946954754	13.0229136813847	12.8421452343329	13.0130980868869	12.8830388897133	13.0553018134502
KU-MEL-3	12.504	12.8436763805079	14.4588200169925	15.5889126494523	13.6224917388926	13.7234411139622	13.1337511187843	14.4706698708828	11.3977031309738	12.6687039944421	13.6329514522945	13.9214857598437
PTP4A2	14.1343454543521	14.1100606976519	14.1557817028346	13.5950549595266	13.3810421347223	13.960324450977	14.549794764492	14.2761830993718	13.6075393876519	13.1234515222315	13.8543564813922	13.5806041403846
FPR1	14.5785577653979	15.0810691492954	15.7911008142376	15.3020075355301	12.0240133672582	12.2458465618628	10.3739504168537	11.942856783718	10.6079212537667	9.81458908482534	11.2065729478787	10.8304526286232
IER5	14.551689902825	14.7633828150449	15.5646169688674	12.9822019061786	12.3892058906695	13.974680371307	14.5012876099335	14.4905875928297	13.231322719554	13.3377387497055	13.4735145811296	13.9100243994097
ALDH2	13.9022645827769	13.6400482041994	12.1475449178566	15.098159215682	13.8863352087176	13.0672912024738	14.4540874098626	14.3673438420259	12.6261266370395	12.9272290994146	13.2188991039308	14.0479228269908
PHC2	14.2146734384984	14.3612576144416	15.1005157897806	14.7343743668709	13.0252182186855	13.8484689925867	13.6089316011872	13.9575834008494	12.6367029990302	12.5821443894423	13.0613734442952	13.2606733781025
COTL1	13.5539281206514	14.3576778493928	14.4781074694366	14.576818058973	12.3751013477626	14.0496092149038	13.0758633445745	13.3960623254102	12.2929800173256	12.3985573366023	13.1209397820222	14.1974558147417
PRKCSH	14.2469618489418	14.3955238072229	13.7811885472777	14.1176286362211	13.4520094123261	13.8815726548268	14.3185947675363	14.3036355853797	13.5450149226109	13.1149185322451	13.783054522669	13.6186180802289
MSX2	13.1920103832805	13.2958580183758	14.605002582457	14.4867296852709	14.242	13.9834241164237	14.253328287951	14.7827	13.445404199381	13.6298635008019	13.8473070763695	14.1123599853115
GNG5	14.1084802858175	14.4491165294448	14.1622031901898	14.5675393081332	13.5074588884243	13.404511133176	13.978155317754	13.6203355160285	12.4944280690099	12.4892117353777	12.8175615525614	13.1395651999026
IQCE	13.0746252368572	13.1067587085667	14.0901044277403	15.2147032008871	13.4437438555427	14.1362349725112	13.9541500056047	14.4096254564588	13.3989726308111	12.4942817129015	13.6572680660388	13.7447912695911
CHI3L1	12.8683346467476	13.2591556922561	14.5616334804457	14.3192445208928	14.3226620363593	14.3548052820885	14.2175023829062	14.8748227322645	13.6652541802881	13.7301120598269	13.7895706858938	14.1689639899333
GNAO1	12.959185764681	13.1672397036854	14.0489492686191	14.7325386640727	14.4904623782952	14.0931128965982	14.4331841540436	14.7089464074029	14.0078401915328	13.7600279396145	13.992559702033	13.9062875620774
HMGN1	13.967	14.3109386867168	13.3907957661507	13.4271636990048	13.9444198463631	14.3074506316603	14.4469883537483	13.9681363567858	12.685544516736	13.4184568292751	13.1729172825066	13.5686078721127
CNBP	13.444488964536	13.7878719854383	14.6748162549566	14.1303439077138	13.4621862535217	14.4381525817316	14.0894153493425	13.9542646431754	12.4754748211665	13.168761894903	13.1361006211207	13.3487951483797
COMMD6	13.7216901634395	13.692965304114	12.7782762954065	13.8599679142276	13.5647551196704	14.0432739274657	14.5944580103039	14.4326100020511	13.3689298486497	13.3088700287863	13.5207243278287	13.5595730743627
ANKRD13D	14.1774636894817	14.1524964563935	14.3564487603318	14.6094319154862	13.8407389490633	13.4919948178759	13.8098580190725	14.0846961336928	12.8532001895155	13.001037823929	13.1668629017075	13.5634197784727
SPECC1	12.8799016377191	12.9389989061287	14.2966011592177	14.7863	13.9392524351629	14.0739640333082	14.1437703561652	14.8364487804178	13.5625536614047	13.5857349939587	13.868850157626	14.0560563307338
GNS	13.9791608029565	14.119769084894	14.8297923236262	15.1280151091242	13.6368281172665	13.1836193898606	13.6795594356547	13.8909834670572	12.5117682283668	12.3409978492897	12.4896434368979	13.1639880390395
GAPDH	12.6991697229374	13.4709455634207	14.9912370655053	13.4048376645829	11.4905493640798	14.676247091526	12.3359659008789	13.9828693970728	11.410086144434	12.0875263807552	12.7766670150683	13.7476779336626
SASH3	14.0185481096471	14.1722734819453	15.1812209708033	14.5090770913755	13.6228896906109	13.6589344145387	13.894674634647	14.4392261249484	12.5770265121228	12.8649192951631	13.2140140350503	13.4605196629939
TMC8	14.4206238833863	14.6416923551601	13.8466942818801	13.1407599589046	13.8618640310192	14.051946516296	14.2553289883395	13.8732632711628	13.2404320945285	13.2237235988422	13.8745575705723	13.4057386509084
ATP6V0E2	13.0464013541587	13.0103957367401	14.3160201822561	14.4645173581633	14.0691014016245	14.1540620590044	14.0856070076227	14.4821814291829	13.5015902452698	13.3088700287863	13.7789586551305	13.818928317858
EIF4A2	13.3607257980727	13.9918365545198	13.4667087118122	12.632269841621	12.7857857177647	14.8812775311039	14.2072934430695	14.2923325903111	12.7590703525107	13.2196478133311	13.5221478545715	13.8892157521078
WDR1	14.4255022295212	14.2640635981524	14.8907832142182	14.1980500143083	13.656242832217	13.7481210003292	13.9819425594444	13.5381082366215	12.9250166537006	12.7464019574394	12.928837240761	13.2189622611461
FNBP1	14.3047085947338	14.1714875848754	14.015563738145	14.4338918619915	14.043407762184	13.6003705754186	13.7839396122968	13.3661623258125	12.1271541216497	12.5568437054246	12.438794369237	12.8920622180337
RAD23A	13.8770658681631	13.8411045579266	14.0543295837097	14.0913985911802	14.094115845474	14.1576838764765	13.8219992240802	15.0142803391245	13.0398909801329	13.3502826169722	13.367079692561	13.8021732026008
ACTR3	14.1205116118289	14.1975366019918	14.272307336635	14.6937035006847	13.6000293952932	13.0472364156115	12.8921818770872	12.4138030025067	11.5949939361202	11.8384117831626	12.1119750119295	12.1670557646413
LITAF	14.0539585335034	14.6806016777072	15.1189987582893	14.0458840227842	12.8910346008394	14.1635628735065	12.6231728944758	13.7396725881565	12.668220179384	12.9101328292291	13.2852355156743	13.1502117680496
CTSS	13.1281278517584	13.9597636766945	12.1916583941244	14.9152144317267	12.7411738877112	13.5355554646163	13.0683623331437	14.0970804312355	11.8564658604925	12.1359087928655	12.9460266563229	13.3942234577701
FAU	14.0097260447162	14.4739100161342	15.0082536435413	13.5757720375283	12.126358587509	14.681773675227	13.4992106351275	14.0324181571888	12.6134337928537	12.7737632100677	13.2440382002106	13.4933897447596
FOXP1	13.6268712142766	13.8674266257486	13.7981077440145	13.0392728544465	13.6218547868166	14.8288581313025	14.4685190510896	14.2413071390451	13.272757660608	13.7017559268303	13.5489313464024	13.7714951581482
C19orf77	12.3829685912365	12.9104336065978	14.0854461760657	15.2724955873948	13.6100201752713	13.5985824896803	14.1778319420321	14.7376684975804	14.0261522474666	13.411416323933	13.9199018822526	14.0632655725285
GIGYF1	14.044859155586	14.2428038786257	14.1341679412403	14.2733152798239	13.751838440516	13.7314833085695	14.1551827468505	14.5720339818885	13.6561240592789	13.313466828049	13.9147327339965	13.9196333356554
ANP32A	13.8455947199651	14.0883653695647	15.7999849101388	14.5325613498036	13.4301650215972	13.7313444307206	13.182564975991	13.2083623130386	11.8264235084198	12.2072174689481	12.3064469446802	12.8607755841927
KCNAB2	14.2735608501083	14.4628718883713	14.9604547414963	14.0521971646235	13.6956682137731	13.3766776571856	13.8326998193828	13.4799649674323	12.6424621277738	12.6317591118861	13.0063790489028	13.2083071604678
DNPH1	12.9650900453628	13.0805199418992	14.2577226094335	15.037449578198	13.5458241396764	13.9892723738759	13.8452864970131	14.3146613506153	13.0695603386492	13.1674929131329	13.4466962108889	13.7418488971539
HERPUD1	14.6708428005378	14.6116610063595	14.6730686387476	13.2462155048851	12.9727329542831	14.2320088615236	14.6371129840548	14.3472110438201	12.8720784532474	13.3821764501737	13.4180960532592	13.7760850338597
F13A1	14.9227174073421	12.5850177703333	13.5260007006496	13.6060851920273	14.4860505301313	13.8543475285325	12.6507950319229	13.146723000218	12.7730624219731	12.0065724514944	11.9361396248446	12.468579210753
CCND3	15.2724588768669	14.7465295783136	13.8269424318478	14.1321273907559	13.4764376139037	13.6834053356875	13.1943106496808	13.1997748941442	12.3081826226532	12.1808356102037	12.7075850137349	12.4392018920612
SNRPD2	14.3200112802151	14.2454201941567	13.7551283998073	13.5536517836578	13.4433834067121	14.1106501758072	14.4192077978845	13.9767788237775	13.4284025420882	13.3432752397273	13.2714766390434	13.6432550558332
TRAPPC5	14.4898749028688	14.3233301623876	15.2711981520358	14.371704166146	13.5992	13.5044419958265	13.769769527799	13.1835516824199	12.2552383418471	12.4097	12.517983068116	13.3914893583947
AOAH	14.9721006280697	14.3549547358574	12.5695996232847	15.0121897811783	14.0853638371852	12.3201248695956	13.5806962685777	13.2937163545703	12.289473407994	12.3963924017501	12.2223465609993	12.926555100411
PPP1R9B	14.2983950668831	14.3956079351375	14.5468305431517	14.7367206632129	13.4867940285856	13.5661288807932	13.571230175055	13.6336547397917	12.5251123880896	12.7282989052369	12.9120439360516	13.3629510269448
C1RL-AS1	12.8361019312731	13.3164444254504	14.2729667882437	14.8319360771351	13.4824147914438	13.8381235625755	13.7797152693481	14.7208564917968	12.9896994505414	13.0887890650537	13.5041719842384	13.8574980914698
NONO	13.954466426836	14.1640495148838	14.057066931772	13.5783907379098	13.217818148224	14.3279623421689	14.2301627994677	14.1222560801201	12.938920008097	13.058302979733	13.5571327257154	13.4932118219336
NPC2	13.5108110498009	13.9272	14.6432127925668	14.3164041308632	12.3258919451678	13.9143313982396	14.0527236424059	14.3109954497834	12.5967643627553	12.6880081193277	13.3665515039306	13.5835041193987
SF3B1	13.1355383225437	13.5974564206582	13.9504506963949	13.6338	12.9901120424661	14.3965881969164	14.3517395351173	14.0436587458163	13.1068056017882	13.4875429107772	13.7775024829611	13.8000650645977
SLC36A1	12.3387108318843	13.442481273577	15.1227925331056	14.9975283209233	13.317459199569	13.4465280590239	13.9745693252498	14.683410109847	13.6807900138556	13.7010983024401	13.8911783903583	13.2629015635838
NINJ1	13.9727394451739	14.2777299851657	16.8518152036754	12.3275060507347	11.0237721041599	13.5483042391178	12.9827498143748	13.6778553459169	12.4630769246184	11.8931774768883	12.8221916024581	12.9425418081578
RGS10	13.9510872343896	12.8780433565743	13.4414545624592	13.7854307182429	14.2450623101146	13.9575072872436	14.288583397606	13.9866382273262	13.7075516892494	13.1514287634093	13.3312563867461	13.4530988175288
UCP2	14.6290155722946	14.6524340858012	12.6090821163635	14.0152869805104	13.9344512354307	13.5985444206702	13.3507379399985	12.749241271146	12.0957400272675	11.9525859121764	12.1211890091341	13.0992960672571
NLRC5	13.0221745927055	13.134546435306	14.3748643832804	14.6881450612375	13.4664498551166	14.1169362219336	13.8877378810522	14.3237855540808	13.0136616683255	13.2233165380871	13.6478803699101	13.4360450603563
EEF1D	13.1774252846196	13.5415300474158	13.8949222507283	13.4242553047659	12.7668967590793	14.5488389765573	13.773901696228	14.4337147987014	13.3408685049111	13.4153418561017	13.7985397321316	14.1378508985879
HDAC1	14.2309079711682	14.2779125490118	14.0713263333648	14.3227627610205	14.0213595007061	13.6490433339808	13.6696789802116	13.7412233330197	12.6251153090171	12.7529033301786	12.925494181805	13.0585922104283
COX6C	13.7494583002249	13.5646852637906	12.628940654318	13.5253461861809	13.7177438165114	13.7530546009127	14.7289931143624	14.2192885930493	13.5576589679743	13.4618060835309	13.2657284248506	13.557872733094
HBQ1	11.4687868327564	9.77854956503336	16.8488010744459	14.9307000996414	11.0457838048255	13.3011220017342	11.5233864281005	13.0453787483115	12.8089082344202	13.5336625018649	12.8930982070864	10.4453019529389
CD6	14.4757935095043	14.1301206068257	14.3018728776907	11.6779233185397	12.8883889094272	14.9099378429893	14.369798268873	13.9987899050343	13.5548734932751	13.1723512935165	13.5548163064184	13.4628232991499
PIK3CD	14.3251063230067	14.6218369668519	14.1505623404385	14.9477945405805	13.5945210632627	14.1047387281584	13.2031702352348	13.0040131597121	11.9478738316721	12.1753745918912	12.4810481100067	12.9118986552344
CD247	14.0213287019434	14.1193616253004	13.960719839122	13.0076839809069	13.4952520287034	14.1104099105942	14.3651335615116	14.3731444294253	14.0650796177819	13.4899984611472	13.9741865764955	13.0565064879034
NDUFB8	14.2618047991209	14.3079023411622	14.0251016711333	13.7390795913115	13.6329610394799	14.0811746744749	14.2510632802681	13.8675086624942	12.8449712186268	13.2159697351903	13.1559005739384	13.3807573539959
WASF2	13.3610770495422	13.6644819503688	13.4728	14.8601545724199	13.2098932640364	13.8613131867946	13.8048777594489	14.1022459122039	12.5164118303969	12.7229817723847	12.9216640328536	13.6822253636173
FAM65B	14.1916534841739	13.9046716349382	11.8793670684611	14.7683144892497	14.3824530287115	12.0973917057725	12.2353773290813	11.3712436225023	10.692421606143	11.5073312872898	10.9463993580179	11.3533532038137
CD300A	14.6407443541153	14.611697218735	15.1274621653883	14.6828693488723	13.6165891800955	12.3291464244833	12.727242853804	12.5778464716967	11.2779824750765	11.8558489197892	11.4443758129687	11.8187219499654
UBL5	14.3187460055416	14.217994813321	13.9901794852639	14.429683369943	13.7863543242686	13.4704393839504	13.8333405022705	13.4529184607616	12.7767101180233	12.6852028135758	12.6986599950494	12.9349636561719
NDUFS5	13.8869177348327	13.8026665882202	13.6759231697756	13.2161581618559	13.7187866567683	14.0122311395977	14.8787836120791	14.4289406647536	13.9245912594877	12.9737093857846	13.7501597740674	13.3689755680478
ARL4C	14.3104490896752	14.3848418721599	13.4328811091502	12.7355974367033	13.1857462812383	14.6627833999402	14.4548446035684	14.1998709516901	13.6415696547594	13.3827233502779	13.4296885220819	13.4513292173494
CSK	14.6181828373234	14.5971393686467	14.4250590423442	14.6317046560857	13.4669819196553	13.534680305046	13.4868992854096	13.5855479120656	12.2656593301553	12.3512798855008	12.7527482402318	13.020003693171
GBP2	13.5645661973817	13.5932813103774	15.6575134715726	14.3346222801646	12.8720103586827	13.2980308988402	13.4494740096854	13.0884738973297	12.2060372708252	12.0381594099652	12.6287279348612	12.0819073913247
C14orf166	13.9194188547602	13.9499438210426	13.7808574042724	13.7771909658588	13.4269781527132	14.0983991929226	14.6374798712172	14.1909919962118	13.3479351759687	13.3562354493022	13.3432071155433	13.7103055600701
KLF6	13.4111240274496	14.1181895379431	14.754080640044	12.8978368920576	11.9357970304257	14.3469180231007	13.5196919301663	14.0055316306064	12.8934453951608	13.2760794396085	13.3784765646989	13.2538
NXF1	14.7073534205029	14.7003509975795	14.8469769137965	13.6243363517934	13.1649096420941	13.8360584603296	14.1016026133593	13.6378991252496	12.7803486145297	12.8246974125001	13.0332511018573	13.3275303102032
ZBTB7B	13.6834400533964	13.7269274913167	14.7898682406062	14.9392567223422	13.4733514456031	13.6611597058681	13.2980395821037	13.8162188271919	12.6472023896766	12.4983249057369	12.977498814934	13.2665150412509
PEBP1	14.0729521235146	13.9982772503705	12.4653135715213	13.0733211677052	13.9346435902179	14.106881417024	14.9393641433413	14.0398834211725	13.4179293590242	13.7469894568109	13.452680647148	13.5682137808853
FAIM3	14.0555870887622	14.4009400339368	13.5036996531609	13.1856759461484	14.3242290116929	14.0290794155962	13.0234373837775	12.7015686735135	11.6768206303996	12.0799021956472	12.0376137978558	12.4345146945885
SSR4	14.536103597235	14.3073211352227	13.9731789925275	13.6286066837277	13.4695508065612	13.9257554602299	14.1609016697088	13.7870781139442	13.0315188377661	12.9630215405452	13.0573426201151	13.3951125112991
SNTB1	12.4141087166644	12.6728826851299	13.9239436592833	14.827883989476	14.1493585737652	13.9238121443354	14.491431633195	14.6637957646463	13.5191172733041	13.2896546717158	13.6605752871855	13.772375201515
MYD88	13.203122669212	13.4178412187399	14.5624428669039	14.8222678286937	12.9994594604677	13.7295377978864	13.138189059175	14.0373227868995	12.7835247888163	12.9178260752269	13.3355808571424	13.0697714839332
NADK	14.5694673228149	14.3876360983783	14.8689840157175	14.9411654515868	13.6360397585429	12.0497370292371	11.9523341514014	11.4987318833361	10.4873279017314	10.730178235759	11.0032295916514	11.6500084308188
RBM38	13.4911282818788	13.3744503142643	14.1319886487393	13.2743477503267	12.3752903184244	14.596832903426	14.2726	14.9655	14.0732597952283	13.502297794984	14.2431087333764	14.1485853943015
COX5B	13.7818272605073	14.0064531635245	14.0457555231828	14.2569597745065	13.1926254842469	13.8317250551242	14.2394648895533	13.920982049238	13.1321209727876	13.1674929131329	13.3723509771421	13.5975310473608
SH3KBP1	14.4399143740355	14.4032849490799	13.1686502174542	14.5166490870596	13.9471555380542	13.2191134814135	14.0284628467615	13.4320627993764	12.5530321953052	12.6728836870518	12.6465313058885	12.8269140918609
FAM120A	14.3917330471658	14.0617868147802	12.3670851888458	14.2122933745083	13.9173578734484	13.2701956525146	13.6707873978553	13.3345092181737	12.3229148738019	12.7361667112035	12.7996740833979	13.0957067308316
ROBO3	13.0516335593661	12.9578089523776	13.9565036671237	14.4623923913629	14.2952105065338	13.7705284852561	14.5419770647543	14.6139581242614	13.2880139823725	13.2541296733803	13.4346523461898	13.5303911382414
CTNNB1	14.2102449636392	14.1189030960661	13.8494128216914	13.5608698586901	12.8147785187257	13.7776744147651	14.4156341120012	14.2284312650937	13.3514555733902	13.3981333188662	13.7566915073482	13.5900632972543
RELA	14.1799545108743	14.0363290339621	15.0405625489511	12.884540615084	12.9489340832974	14.0384830910354	14.4813592258742	14.1029405582913	13.4344769712708	13.2831271592329	13.5897815472398	13.5744502937211
PHB2	13.562658650154	13.7853057880687	13.4025524216372	13.7318937626132	13.7890518796393	13.978371488722	14.6621790205552	13.9332037369738	13.5617610543691	13.1008053779851	13.4498577561494	13.752096267516
FTH1	14.789571469371	15.0163985749697	15.8257358395718	13.3785028244886	12.4779341615745	12.9482420248998	12.6026844857765	13.1248572750591	11.9603573127299	11.5305491539126	11.9227887202431	12.2690954401963
TCF25	14.6540994942365	14.7596618910511	14.976795630097	13.7162253556262	13.3141116489236	13.8356063245628	13.4528133432394	13.4017190989033	12.8292495807586	12.5088846880038	12.4673195527841	12.8148153258088
CECR1	14.4247463253937	14.3696759481172	11.7364108314338	14.8255092644155	13.6457067522024	12.9404536492382	13.1172970965007	12.8312197310437	11.9205186255463	12.0476171626717	12.2017667674323	12.734
C9orf16	14.5127002289734	13.829132260681	13.7426679839902	14.1259314722568	13.6674743074255	13.8655903888391	14.0126594056106	14.0900535922437	13.7112494897435	13.0813961866918	13.1587506670581	13.3858138975618
FAM167B	12.2585886846131	12.3513595258925	14.0435488133159	14.9831178271563	13.629162806394	13.5616054499331	14.1702909152328	14.6319790822634	13.3235165543749	13.3166186530147	13.7142159045437	13.6140434892417
TERF2IP	14.2707126007074	14.319521902242	14.183003108683	13.5032943679509	13.1408807012259	14.3400579701678	14.4980587381063	13.908990468457	13.1402847078191	13.249639396994	13.4090623421621	13.4256406134796
HMGB2	13.4481306238543	13.7228430314882	13.6637623796418	14.1171784700096	13.4216815072863	13.8790674781849	14.2521091100926	13.7053683143668	12.4097512872248	12.8494397316642	12.9063620698592	13.1749003268501
KLRC4-KLRK1|KLRK1	14.736479578209	14.3385072265252	13.8362148724982	12.893243132956	13.8076548287521	13.7312055395017	13.5664737349974	13.4786696901745	12.5093037865198	13.0527005858704	12.8370103708951	12.3678899784596
GYPC	13.1394341120363	13.5158315693461	15.5558956789205	13.7401763116401	12.8077947934543	14.1715435989319	14.1303723853463	13.5758890296136	13.3089479325489	13.2362858516073	12.9846298449575	13.2049793451975
BAK1	12.8987746245366	13.4361970270899	14.2187944113642	14.8127081199265	13.4105686081119	13.5332470804023	13.1607332775911	14.2845544059696	13.0665834608124	13.3668706100904	13.468764934248	13.7594137828371
CDC42SE2	13.0877371221567	13.3446063397132	14.2617623682129	12.5655340306237	12.9717335117986	15.0428981933643	14.229366472472	13.8411935756204	12.9609304660834	13.4443604277619	13.5146983513086	13.4909562390073
RNF130	13.7098111064479	14.1633085356309	14.0100931172381	14.4447409536097	13.0056982840426	13.0747541357617	13.5272710713264	13.5748879525328	11.7584111031085	12.0485365592679	12.7924827474965	13.2782655686588
CBLL1	12.8877243025106	13.028628687105	14.4577017628671	14.5046954503398	13.853681671066	14.1712620742992	14.3446483825326	14.6355968463331	13.1080729277754	13.0081443001427	13.4530123895817	13.6084690557575
CDC37	14.3112672986416	14.3026181763301	14.2501832220148	14.0236579772548	13.3002451879588	13.4690241545853	13.9196266957833	13.9313112018903	12.7780756297397	12.7544536751915	13.2878414418914	12.9563755624192
MEF2B|MEF2BNB-MEF2B	13.3101412202171	13.5511540271595	14.6274975498957	15.0664778868717	13.2946610685533	13.6124108158373	13.7639156565388	14.1083036497149	12.7691766128559	12.597460096856	13.1739238803819	13.4309760726393
NEDD8	14.4299037952249	14.354002595512	13.9006637034213	14.2654146469427	13.8472929415889	12.7425112973602	13.7238939334288	13.2538449175846	12.8769720937763	12.5183726287056	12.8506716539114	12.6329669707382
GPI	14.1383469252483	13.8845517562384	15.214875877476	14.1502820826888	13.388363569995	13.439616752776	14.106092200754	13.6290425219269	12.726670564695	12.5005102466008	13.0491373162238	12.9453191913235
RPL36A	13.5868868166617	13.8390026452984	12.6071409159194	12.985905098524	12.3483981362307	14.5097378919297	13.9560766416933	14.2970050121751	12.6296607129707	12.6200557396337	13.3054012517482	13.6872114242626
HCAR2|HCAR3	13.9035311241158	13.8914288163887	16.8701736721853	13.7818848695881	11.2137023904884	11.5459210270025	9.49100760646579	12.1769824594635	10.3471662012248	9.8167492878383	10.0303322128216	9.94075907355839
LGALS9C|LGALS9	13.7207324813322	13.6543924804672	13.1937428277696	14.8529403151845	13.0364940175741	13.2102218378888	13.9912630137492	14.0107621603238	12.658120406628	12.4171852565182	13.2286198964166	13.4888756045113
RAB1A	13.9154184530092	14.4380088578982	15.1399358060164	12.6319547549965	11.6835869340884	14.390070814392	13.7909128346868	14.0075636404749	12.1634822812918	12.8956443765414	13.141153347657	13.5216946645067
TOM1	14.2201536796855	14.3306086812524	15.7290489280866	13.5367519856304	12.4489601926376	13.9316301934769	13.8412382637682	13.7975951522501	12.6301648750573	12.6728836870518	12.8380267660697	13.5825009391433
FYB	13.936312619679	14.153641011519	13.8900178443463	13.9062351222294	13.046733540752	13.9211053627464	12.7905152652255	12.5738434275309	11.5202629961823	11.9670027117026	12.3324638303237	12.1506039020958
MIF	14.0409731027137	13.7476395632736	15.7479429379088	13.0166422547094	12.8557146322429	13.4565603207438	13.9148468029181	13.4825520358701	12.7936868171633	12.2935089081118	13.1316519703585	12.785764308952
UBE2V1|TMEM189-UBE2V1	14.2332123484899	14.1293619902608	13.7984349515589	14.0271366002393	13.8172844625788	13.4981706151348	14.0474623253699	13.6518576290755	13.0381824445143	12.7766790919286	12.9428413476021	13.1500613008747
CTSD	14.3020584485334	14.4284605669924	14.9127416011461	14.9200292414402	12.4650299834696	13.4038577460679	12.7191980917091	13.2021654201213	12.3097570532159	12.4453820216905	12.5901878600581	13.1017877404604
ACTR2	14.0052385196159	13.8979169519469	13.1055277161102	14.7767474706352	13.8527998070168	13.3700025934283	13.1194954716054	12.6457580838924	11.7010182299222	11.7518740257086	12.1995937026254	12.0591703202686
NOP10	13.8422019497648	14.5339957718136	15.5722146555211	14.4096500211671	12.6598929043583	13.2911693824159	13.0017351533204	13.2105351298991	11.5327204553795	11.420865005109	12.2664258095442	12.0474236451877
H2AFY	13.1171482502073	13.6799686879223	14.183003108683	13.5433849037311	12.8131055052867	14.2252197953152	13.6246964236444	13.8208040882386	11.7407782254423	12.7461186232985	12.6817752944721	13.6482708637686
HK1	14.4192752248044	13.9119831020327	13.010774781278	14.4306800365446	14.0588434953547	12.9819616482996	13.6084553043033	13.0774296084582	12.5783333863493	12.5053733414355	12.1932533843872	13.0212381929139
JAK1	13.9396089677567	14.2495685285465	13.7027410588852	13.8455012621702	13.5557792816598	14.1755557474129	13.7729912054102	13.6740223342227	12.348875886273	12.5770559073776	13.1187459479984	12.776339159418
PRKAR1A	13.7934555179224	13.6239091242615	12.8278445753568	14.9245386285453	14.0391800375917	13.0095956076762	12.7774998707308	12.6184031577277	11.7295295981174	11.503313291538	12.0613068302828	12.1318303994099
EN2	13.4611322429467	14.019995747571	14.5632517995315	14.2258756314485	12.7119946221238	14.1747133553008	14.2776691377647	14.1048034820001	12.8997315297232	12.1641780851557	12.809034340946	13.2760610044149
ANKRD13A	13.9897621007406	14.0695061146793	15.3988196995932	14.2675967086131	13.0700355919457	13.4904364722552	13.5495598320559	13.2279349305552	12.0677266567228	12.3008580648626	12.7343064648314	12.7969553667965
STX2	13.5263191991239	13.6738771717443	14.5380791121722	14.5798433106407	13.1697113549865	13.8303641399446	13.662748393478	13.9025791671579	12.8048946387363	12.9517625739082	13.3332400460458	13.3648323475874
TSPO	14.6818511530103	14.6257869348096	13.529237468511	14.5845728676171	12.8301626083617	13.3597969768887	12.9944626366078	13.1754406698321	11.7803805237816	12.0082274056568	12.2395634175744	13.0818116942587
RASSF5	13.7854957044271	14.0448292129536	14.8518719526461	13.334934440721	12.975353201386	13.5986966883576	13.7613470997166	13.9156647591852	12.7519072817134	12.879588867804	13.3753295109902	13.3580089968787
MBNL1	14.044312456546	13.761871729026	12.7558070110697	13.5714243302296	13.9047145782099	13.5806943008983	13.1624030238552	12.7520409564261	12.6195402963711	12.4339934684624	12.6585190647279	12.6223765220332
PLAUR	14.5105249180457	14.8617234676791	16.7118851423788	12.4092064543008	10.582786016749	12.4311707976026	11.7062033453284	12.4580249942826	10.7913043756428	10.8399269656022	11.2666877132853	11.6715535312424
CAPZB	14.1724691074196	14.2460735318001	14.7735174585622	13.653811409482	12.972982706803	13.9268474264702	13.2124235692062	12.9896932458738	12.0982930568409	12.2233881290618	12.2588559552508	12.6998696616598
PIK3R5	13.6979724651721	13.8475149943447	15.7902455821758	13.3549275358056	12.7506735101621	13.9150958226351	13.9045188627601	13.6395631514599	12.4304505290161	12.6126149183593	12.8043618032689	12.9052276175257
AP2A1	13.8836208745118	13.7542156117256	14.2080465007823	14.1428375207826	14.2064456243831	13.8385749092747	14.258931943274	13.9140824091487	13.3687788072385	12.8511532711691	12.9120439360516	13.4098918846784
RGS18	13.1980196797745	11.8500347288526	11.9790336151967	13.427254492122	13.6321705653189	13.578070998324	12.9090773141281	12.9223575898431	12.4041613097177	12.6709446212303	11.8177403026696	13.2880762592512
PCBP2	12.9458999302546	13.479781259165	14.1353081635292	13.3927070628589	12.130618627816	14.4316924907325	13.8795274264193	14.0144200530109	12.7186334305497	12.6612	13.4856450590457	13.566128937889
SUN2	14.3937516001936	14.4530427091651	14.057066931772	13.7539240229441	13.5556959098896	13.5191980045214	13.520777105602	13.1394711853123	12.5158662993297	12.4495644043831	12.6851680806492	12.6455096947704
JTB	13.9057599485759	13.8095023178032	13.5175191619057	13.8642663604092	13.3524353396653	13.6711493596511	14.2860327659361	13.6585876313972	13.2179691906226	13.0719319442008	13.4366666510874	13.4297370288199
CTDSP2	13.7506652265907	13.8617133756563	13.2832465652116	14.4031099848629	13.3700846642544	13.6075765069158	13.3817278373615	13.455096357783	12.1869741706199	12.3070179231429	12.7924827474965	13.008845400407
ZDHHC20	13.3767954721384	13.1047017805547	13.5833316179877	13.6718555019273	13.5404415702569	14.0565820763029	14.7037337500051	14.1965862803029	13.1292705494941	13.3651188942536	13.3564789902383	13.5719813866112
SHKBP1	14.3386355115477	14.6637951443539	15.2394971853874	14.6331616079372	13.047445221311	12.8218084490179	13.0310734714544	12.7195118114415	12.1360560689517	11.9442120212758	12.2019641565401	12.6808310270684
UBE2D3	14.0980345741083	14.1667631877002	14.3890123902163	13.8350001853868	13.0639522106152	13.8914257907274	14.1353876013839	13.8576208487161	12.8197778990937	12.9936575040665	13.0054746361983	13.5354111770241
GTF3A	13.7951462103167	13.6444443614517	13.1384684246986	13.4524543388618	13.4961211740764	14.0687521641629	14.4332225761036	14.0697755554944	13.3971964858662	13.2877092507733	13.4938907220531	13.467057234519
TK2	12.5210815940294	12.4901925059508	13.5348254826241	13.7338036975884	13.816727974078	13.9338949568236	14.1894340890503	14.8854652248025	13.506541282239	12.9391762275994	14.0961768464766	13.7855118381292
COX6B1	14.2814690484627	14.4056678304345	14.0201722609894	14.2689144951613	13.2781821323812	13.4185094229932	13.8147031744187	13.4954182482951	12.782618023835	12.4709823169208	12.626964857062	12.7333980871099
STIP1	13.6901655156113	14.0043583594947	14.0010806953589	14.7281234245423	13.0760934292853	14.0192159325182	13.5111266304114	13.3040550096502	13.2169626754813	12.5760998156738	13.0310307828329	13.2170961080936
FLOT1	14.1312598295579	14.3376317424436	16.0839008173408	14.3287047064451	12.775226928474	12.6020753090506	12.8639556456474	12.5602771804612	11.8731736225982	11.6036824268115	11.9657349479762	12.1433656910702
NFE2	14.8577421242082	14.1062617881362	12.680550655637	15.300149635605	14.0463776153345	12.0135334447078	11.2116275999636	11.0624384360242	11.212832223503	10.6871390917984	10.9135107016556	11.0326801224635
CD93	14.4004740241683	14.8573931228874	14.4969791940526	14.9464331478513	14.2936116761445	12.1489395380033	11.775242953306	11.8226504717319	10.6710211570161	10.6900879379414	10.7285855809815	11.3275063328271
STAT5B	13.2915577067722	13.4983891358005	14.3525768345864	14.2779544262455	13.941168449921	13.5899533716383	13.3840354021206	14.3400030737802	12.805564347204	12.8494397316642	13.2060649508714	13.4850035885539
CD84	12.4205265377138	12.5805844657458	13.7230150146377	14.6247540748625	13.4457247133805	13.8502606498113	13.9998493104528	14.4641967077528	13.6522820396271	13.4619786165386	13.6186798905326	13.7231575001939
TAF10	14.192640575347	14.1286029745804	14.991008053125	13.9014720149598	12.9477909520359	13.5871550253002	13.7620814397002	13.3379917096455	12.392321658274	12.2601648400117	12.5983086344433	12.7006917561463
NTF4	13.2460697134188	13.3288329602486	14.3214492449621	14.5674157363875	13.2864451289608	13.8804145516487	13.6166663876229	14.2048520977968	12.4579741890366	12.408975634259	12.8584561875173	13.0066864491729
GRIK5	13.4749916948195	13.5862958302011	14.8214446836224	14.7666291370177	12.8048515178444	13.5142019137484	13.0484344239561	13.5028616556636	12.4539928793918	12.5201964738393	13.0151674864576	12.8160487461284
ZNF385A	13.4617055617815	13.5862221180245	14.5076646629781	14.5024996290437	13.1216355296912	13.6758477706694	14.0084879586873	13.8953797157893	12.3836767430529	12.6903662585556	12.9769221929371	13.7166696432152
RAB6C|RAB6A|WTH3DI	13.3312697603887	13.4075324513961	14.143573687228	14.3980233020475	13.4219559487409	13.5928991803006	13.2813180277487	14.0337225765837	12.7909839340147	13.2243339747809	13.4635880542844	13.5203565581437
NSA2	13.2554528330249	13.1202613752243	12.6675694649563	12.9876300074026	13.5811490908246	13.8007564997026	14.6910326684839	14.1802230386847	13.4891378039009	13.5102448414429	13.3649657740537	13.7316287762211
MYO1F	14.4656213880173	14.6663077199674	14.6723190122243	14.6105917364341	13.3081851923034	12.3315304592229	12.1243935583093	12.7179852700287	11.4024330105646	11.3250953156952	11.8185129144738	12.5063316871477
CKLF	14.4843636253304	14.6160721840621	14.4502661521211	14.8934617093782	13.0577253316283	12.2151892042344	12.2452150767062	11.8251341493338	10.8548018635142	10.8536685148765	11.3520534418393	11.2039388852261
VPREB3	12.1797399340546	12.7989610560297	14.121670264168	15.0925597770274	13.7200519509838	13.3443973008444	13.6545325190529	14.1517073698281	13.3034267893522	13.1230151584388	13.1976759533975	13.1271587478252
ATP5F1	13.5292915343128	13.5593630901503	13.1284046863014	13.8474023640822	13.3726425513087	13.5398836680756	14.2142415867618	14.0034967555299	13.068258710455	12.8804927145924	13.2723228007247	13.291490889123
ARF5	14.2321086272519	14.2332326906671	14.365001288957	14.0309653715848	13.2101051602566	13.2475536168568	13.9236252269126	13.5296489453437	12.5983111735989	12.6413891359153	12.8642047867621	13.1328043514422
PSMA7	14.1827888120061	14.0777611757485	13.3848813134976	13.9975420660153	13.3555036808885	13.2907924647411	13.9494295922257	13.5421036994079	12.6620701979153	12.489888762649	12.7721541876765	12.7194717797255
HLA-DQB1|LOC101060835	13.3693069201475	14.8375273593354	15.4609492057925	12.8583829632754	12.408538778928	14.5502174380109	13.2137662047545	12.6476636662555	11.4727059529425	11.8153697690831	11.2148127094756	12.8387255326032
HIGD2A	13.5494659104595	13.779901867499	12.8876249839566	13.6248114576716	13.0276247165131	14.0025966710599	14.1899344428496	14.1140459162652	13.0429233899138	12.8983242581048	13.5142215431573	13.3838317955425
CCDC88B	14.9509930352087	14.3490152436899	14.3900983133434	14.5155393036614	13.7595320592137	12.816253925688	13.4772423437025	12.9167127128582	12.6799551557404	12.2339340391881	12.6213675210903	12.6978123732837
DYNLRB1	14.4890314736789	13.7931184650127	13.926281069186	13.9140956652282	13.7615575037082	13.7471597271493	13.5927174312012	13.1728661289254	12.7597616691694	12.5552273676633	12.448476488074	12.5634883159329
CENPK	13.0795428289674	13.2475503189182	13.469834622379	12.9334305993793	13.1970152980578	13.9627812682111	14.659882381614	13.5865416232377	13.6140531902464	13.3954258449255	13.5271979346282	13.7750121152362
CCDC69	14.0854415750189	13.6836939687517	14.1309497319938	13.9002951286835	13.3891123892414	13.4665233012743	14.0771242548502	13.8309907188472	13.2875346621897	13.020028371894	13.3955774170031	13.2189622611461
LDHA	12.7299565076797	13.2352868629257	15.4722320497499	12.934708513971	12.0975558870438	14.2502007284208	13.6971371068075	13.8220924596068	12.5032618127371	12.3774922837237	12.5512097911802	13.2482158901554
ATP5J2	14.1848736874953	14.1463101193309	12.8333478439411	14.3270025517334	13.5608558286201	13.0998216537905	13.669418051536	13.1339725286496	12.2348309229467	12.399278260479	12.4842976486042	12.7953207168909
ADAR	13.9906136597496	14.0917443921269	14.1888056972561	13.918817344721	12.6832818194502	14.1847643842069	13.0938637953922	13.1145967515316	11.6047744665875	12.4445091637947	12.873652572463	12.8690268010536
COX8A	13.7471757906382	13.9917252554563	13.7738192266469	13.6834566876412	12.7996510911544	13.8363813270125	13.9736714328936	13.9377193221207	13.0529229632754	12.7331677014807	13.3796985662394	13.1723096396151
HSPA9	13.9484599825411	13.8624439880174	13.9123204043175	13.0694869760939	12.8172844070098	14.2069828302989	14.1714890758909	13.9080284960583	13.2301592074951	13.149394718048	13.5746170028695	13.2679024339801
C19orf6	14.0794772069912	14.2384484166146	14.466582439761	13.3225894724796	12.526386142573	13.9193691341691	13.8045213674586	13.8198259357166	12.524841288498	12.6202103494264	13.3572767501945	13.1031096935998
U2AF2	13.4198329531256	13.6315012674837	13.9370203101623	14.5796799458472	12.9225394571574	13.6387878277896	13.6035471000495	14.0995738943662	12.605764135661	12.6887454519614	13.3744541099448	13.2059929712645
DEDD2	13.8292488567955	14.0156781259687	15.4524911610644	13.5706025375866	12.1930542624508	13.6390839708901	13.5885835083172	13.6109589128832	12.6578731853391	12.6060725695238	13.113509066847	13.3603520684686
SND1	13.2209390781919	13.4928948431231	13.3691073574302	14.6282730426688	13.5273218371351	13.3213772944625	13.7045416572924	14.1935687477317	12.9293246540077	12.7805577895649	13.2415439116044	13.479445494432
TPI1|TPI1P2	13.8327355074107	13.5887997848654	16.1252848853245	13.6088896621831	12.4641418977153	12.8303921270053	12.8612166476989	12.7350664318813	12.1221449334338	11.6732865974381	12.1119750119295	12.5176890479181
CD53	13.4558798752334	14.1688812373522	14.7699	13.3288237620827	12.0208762850401	13.3183293340731	11.5869344891531	12.4212094795566	10.7445737850966	11.2188425265385	11.4964810361834	11.3507368824081
TAB1	12.6338089932631	12.8307925103212	13.9087484110249	14.7978976652701	13.7938665324068	13.5430125281896	13.9689615589865	14.2420375468196	12.8033307756614	12.6625617994937	13.2203614049524	13.4694107615049
CTSW	13.7701045171897	14.1321921264653	12.548123116344	12.7141766191747	13.556029365671	13.6966610393993	14.5118773513308	13.6305139515357	14.2109812129663	13.7751036221124	13.6299470399145	12.2717256424895
CD97	14.015	14.2794634089314	13.7321557848231	14.3788573133185	11.9609454491256	13.6040918137174	12.7709478745965	13.9505726731095	12.3353355396158	12.062940301465	12.9307440879852	12.767636838709
CPSF1	13.6730098156157	13.9015944733316	13.4119063562053	14.0758456088202	13.7278425014155	13.5451078381431	14.1045007196953	14.2876449868047	12.7351	12.5995004169381	13.0033243810543	13.2393321907986
HRC	13.2469252504536	13.4541606692113	14.6594433461109	14.9092138636977	12.8952576413208	13.3889236805585	13.4912608160818	13.5004772816781	12.2601325537811	12.1707375293067	12.7770645289701	12.6891395830601
DNAJB1	14.6349826588612	14.5875973767789	14.8086370495568	12.2472906653697	12.4779341615745	14.3428559035152	13.6335517163783	13.324512672883	12.3644129944131	12.524002533858	12.6901016349837	12.8564477849818
CMIP	14.0552615245765	13.5946010714307	13.8492864920739	14.298747184781	13.8030265323545	12.8214823037142	13.3992206642433	13.1290272931708	12.6758099263244	12.2623458742009	12.3412718624757	12.3645219824998
TUBB4B	14.5836837037401	14.6666214843256	14.4321615410424	13.7584054673669	13.5687265258877	13.1260465435903	13.4318914840597	12.9750700215661	12.9494623063832	11.9481587310232	12.6626841870036	12.4888287972433
ANP32B	13.2130802542363	13.3134196582212	13.0675882605789	13.4391892795453	13.498552000184	14.1364971951755	14.5134773006965	13.6890501918115	13.0209848715173	13.2313347997238	13.1323771046569	13.5986892315392
ATXN2L	14.077608273754	14.2060041998744	14.0496091621551	13.6997837399361	13.1200577050119	13.8026744561661	13.8995217178148	13.5498470783168	12.8516878491216	12.9273540598189	13.1061453496754	13.1143362179404
GCA	13.6477515925033	13.5813488095774	12.8812135798796	15.2545198105857	13.3027311368109	11.9308016095995	11.8106931349113	12.2814432499332	10.5737335620133	10.8462854873443	11.9290027230334	11.6534094043781
JUN	15.2744648157283	15.5962123711788	14.4186027024878	11.2088194836054	12.3125335607457	12.6598418475318	14.0863401621674	13.1916860920628	12.227519627972	11.9706451448828	12.2626458472919	12.0368831687693
ARPC4	14.4157289855699	14.3477548365977	14.0274484193669	14.1062187152011	13.0811994984888	13.2068295913599	13.095	12.9607811772309	12.0847470081939	12.055642086813	12.3378628832913	12.8724965286719
C9orf142	14.5724280040136	14.3867476134173	12.7042133152733	13.1786819340515	13.2979543257209	13.293758032738	14.0372357165903	13.873777490546	13.2367952437648	13.0248248020138	13.0092016896468	13.0656292878931
CSTB	14.1765659401196	14.3126772403203	13.9783868521618	14.0744549731254	13.0687508603064	12.8497126173257	13.5033155813361	12.6271726301759	11.5423952869579	11.9944572834729	11.854617847485	12.5030365751732
ARL6IP5	13.9570246833123	13.5994298954221	13.9726571712817	14.0077781149904	13.355695234507	13.3364299501675	13.1357357157149	13.1076913486927	12.0736695811498	12.1072951022901	12.6260825097536	12.4193625611467
PELP1	11.9897444539367	11.8919063449277	15.5326794165473	15.1487563334231	12.9011754547332	13.2154442486718	13.1811014596854	14.0436587458163	12.6879679358078	13.445320641003	12.9756528129326	12.540483447875
LRCH4	13.0674325357058	13.2039240734609	14.3910098576582	15.0060026922082	13.0442398902939	13.4504987212295	13.1566435214535	13.8626811675207	12.4132706723382	12.3400594748447	12.8841463938396	12.8167124590749
P4HB	13.5398794659566	13.9818971643534	15.6172574625792	13.1462860721843	11.7619909858751	13.8275085292036	13.0264966706304	13.5670132161282	12.1271541216497	12.2369618574324	12.7894647996728	13.106215401606
VCAN	13.5865113639245	13.7676035231288	12.2703837744007	14.109447496061	12.3457004284066	12.9165887486384	11.3219851923586	12.5989413392422	10.3989701879659	11.0260051113661	11.8513497851192	12.4990252235322
LYZ	9.85799482037059	12.7189264099327	8.97567326296229	12.3577359898349	9.40613526298308	14.8551306424705	9.20448277524896	12.8097027462186	11.1001650188604	9.6940319693698	11.0583419059809	12.2852163168431
TALDO1	14.3073538824073	14.539526390339	14.251378790121	14.4712258452378	12.6977096505944	12.5093854186265	11.9964788548709	12.5257927273234	10.9588089928787	10.9790370517259	11.6112057081318	12.3857636238665
ARHGAP4	14.2688418393275	14.280739336954	14.2714590272214	14.0342476229263	12.7579385831932	13.3792504251084	13.4624840458043	13.4860316314878	12.9233721209852	12.5369995729304	13.2038983554413	12.868295267572
NDUFA1	13.7407789835981	13.8846716378731	13.6480164308168	13.9175252700407	12.7550369427685	13.6882787212021	13.7253380801161	13.6966753737231	12.4053399485202	12.5291166052147	12.6575118861615	13.1367583570306
CCL4L1|CCL4L2|CCL4|LOC101060278	14.1704664231527	14.7706662676429	15.9499323728594	12.8950823923112	11.4888038158958	12.9890651321574	13.2506870893905	13.1242811531969	11.4322268453852	10.7802963374625	11.9165478365613	11.7391325836601
GNB2	14.2826283707254	14.2699954819662	14.7999696571701	14.1562101971249	12.8390957337126	13.1921715335919	13.0858695848369	12.8828825930736	12.0463537864148	12.0056259104911	12.1191000802212	12.8854793810632
TREM1	14.7061096946727	15.0045329903443	15.9216144752078	12.9878762546642	11.7640129835622	12.1374562629939	11.2637190174925	12.7952983533377	12.010787865512	10.9727543757092	11.8957104414282	11.5708375026639
EMC3	14.281886511517	13.4501160295643	13.9309445585797	13.1456240551963	13.7532932106168	13.3541259044493	13.9795240797913	13.5563216873493	13.1466416493178	13.0695561505163	12.7039658813022	13.5547502261739
HECA	13.5742177757875	13.6322154496359	14.1644388977696	12.773942499876	12.4094617495102	14.7586382432514	14.094331773304	13.6901697790072	12.7567635680844	13.0601276311132	13.2322966916029	13.3813343117433
GRIPAP1	12.1896619086968	12.1578137125472	15.1675816570315	14.8055663870766	13.2149702023672	13.4038577460679	13.785686080014	13.8744628320479	12.9967540733998	13.5926852026093	13.2753273625676	12.6423039926307
EIF3G	13.8514816867372	14.2280452835938	13.8420673232827	13.6608553985537	12.4832039660151	13.8723761585741	13.9558626975258	13.7801458360089	13.0175206191584	12.7445592905145	13.1746280812917	13.1440297102892
MKRN1	13.3598472971303	13.3888904087433	14.2901471893724	13.7214917686329	12.497510650366	13.893816551025	13.9879710818199	13.8206262920999	12.5686343665669	12.8763562125589	13.4365827776803	13.3792176728172
SEPT2	13.2553583585361	13.3275106930431	14.065900431677	13.5125664117864	13.2800000192959	14.4098390474425	13.3735020390617	13.3188590269033	12.0968347361055	12.4010789951158	12.4260082952243	12.8949384028789
RNASEH2C	12.7041621217921	12.7740679546775	14.5493989974441	14.2749810375303	13.294261375723	13.6003705754186	13.7253380801161	14.5500296893498	13.2134343328169	13.4854226973793	13.4606214754841	13.0713614747907
NAPA	14.4578833747887	14.4766961668643	15.5148693783261	13.4228899735581	12.549	13.2798662599869	13.2194807855115	13.0283896341108	12.274393864966	11.8867657200561	12.708140998299	12.0177140453767
SNRPG	13.4708	13.6278534306557	13.7383767932322	13.5838582956272	13.2632496855599	13.512384528202	13.9283216512284	13.7729503775272	12.9641332800549	13.0675166375741	13.1147676530487	13.0565064879034
PLEKHA2	13.581018594997	13.679692357992	13.5569635827575	13.6938336810013	13.4747630847951	13.8885640936292	14.0366794890244	13.6834391837916	12.6351968287762	12.6147891250679	13.2488228223401	12.8811345141521
ADD1	14.0615427784401	13.943916118533	13.6514982126728	13.9378059772564	13.7964795353367	13.1012195171958	13.3544758364331	12.7998151947207	12.2368184986286	12.4436357774835	12.4340968839346	12.5224628289069
MACC1	11.6040298148164	12.2666879343302	13.447809665274	14.3660791474731	13.4403159527768	13.5434476543939	13.9508258686273	14.3473653269919	14.009778758869	13.3941606174705	14.1826823941908	14.0875895480357
TRAM1	13.5402672509678	13.3730837761203	13.9224433251779	13.0317686956523	12.9470283608299	14.1974630101092	13.8232898394113	13.7566397889824	12.6372047063269	12.7768177965926	13.2355785315147	13.0547392875701
DYNLT1	13.5139734289412	13.8266384771554	13.8966348613002	13.7910860102788	11.9444833746576	14.3436510726597	13.8902031293611	14.052164602702	11.9987350117807	12.6698994283442	13.1843510743506	13.1011652255244
MAFB	14.2127285299201	14.8165675903701	14.3842245947235	14.6409333616551	12.5487	13.2944632240678	13.289745470942	12.5460445432143	11.7120142866097	11.5491829559776	11.8143875278948	11.7155332754479
SEC61B	13.3970623375302	13.6765799943114	13.7188031805448	13.3536860519344	12.8736164763987	13.9440875650368	13.963119040242	13.8068248476071	12.524027683687	12.671989057451	12.7974551319444	13.064512046434
CLEC2B	13.6165372723075	13.590344176977	14.658830776308	13.6187023521699	12.8611220417847	13.6246879121393	13.5161413250845	13.6201822922629	13.026548729056	12.275952206727	13.4451962140416	12.5847968123341
C1orf63	13.9275051221338	13.6267787798458	12.6327623393644	13.9948491508085	12.9538772122571	13.2212413240343	13.5152704543641	13.5447970851853	12.2463867011815	12.4010789951158	12.6913675410577	12.7689112425421
TPGS1	13.3147726018558	13.5206994959771	14.4157049591622	13.538434090549	13.4717616985735	13.9991689756399	13.8552429552865	14.3206143591312	13.0602371264643	12.7252834782299	13.2204588389877	13.2665150412509
IL4R	14.4928430627996	14.2884619130278	14.0701885859967	13.9790807911731	13.6469594996007	13.3728543989812	13.1523554348616	13.1977911675021	12.0300182354788	11.9638384802011	12.2497193868771	12.4971336625281
JAK3	14.2198147994345	14.2810126035067	13.9602519838746	14.1400704973014	13.2586474570059	13.280388436165	12.9486433952811	12.743906854524	11.9639614089552	12.0164738187002	12.1912663069325	12.1481951980645
FGD3	14.6454020881153	14.4260738837975	14.3651780081216	14.6282730426688	13.615309769629	12.3759166292814	12.3977543064961	11.9721266613716	11.8082713750538	11.5126712665868	11.6510763760362	11.7102361448488
PFAS	13.3234503674636	13.249692727976	14.7030533437801	14.1672873588142	13.4144356847927	13.7032611976305	13.7954035092926	13.9681363567858	12.9663310973346	12.8987066921745	13.0462818826863	13.0477295297448
ARPC3	13.0926102984361	13.6005980885458	13.5842427899947	13.8059661972962	12.6553871486252	13.268186718196	12.8128953127222	13.3964202518427	11.9699482992165	12.2771293239427	12.7557094413486	13.0707256887448
KIAA0146	14.7217848790447	14.3839940678413	13.2555824993848	13.5421278317622	13.5028826007532	13.3081227021092	13.2834508205091	13.6315785325217	13.1011797368542	13.3203346814175	13.1237555327367	13.6008927274312
ALYREF	14.0979818913391	14.148258683023	13.3317070062871	13.2196221558474	13.3880826627118	13.3244188304511	14.2182606895419	13.630361803902	13.2367952437648	12.9441251450474	12.947322361076	13.0740604442179
DBI	13.7745941191767	13.7392445405462	12.5075525864974	14.0641574233789	13.5228935158739	12.8552675013948	14.0516729125253	13.6251792277061	12.8790945971192	12.6676571764329	13.0567970492723	12.6963705241573
RNF166	13.5322577582899	13.834293149424	14.136913311275	13.7096711775202	12.6240828254049	13.4500346335766	13.4006361223736	13.7910763659839	13.2164591545357	12.9561787266806	13.489531242578	13.6266429504316
HNRNPK	12.7821702459811	13.1570527914031	13.0219144119811	12.4986747487793	12.5755679926723	14.3838552235778	14.1689994739002	14.1903384876547	12.9039071207262	13.3777023228548	13.4481946484905	13.7456379589323
EVI2B	12.1963700841437	13.0105056047734	13.7358506071807	13.0401042455526	11.9203394333756	13.7296768508093	12.1743474596448	12.6451557977572	10.1531432173737	11.3595833624919	11.6441199660543	12.737009036103
POLR2L	14.4148833569459	14.4177721058615	11.4539042603854	13.9135772799116	13.4826779205407	12.8007188869454	13.6234173118732	13.3478956109523	12.382779477776	12.4371562330039	12.3360654430436	12.7618388151332
CCNL1	13.5132624973055	14.3553008132212	13.8889120518433	11.2909424188127	10.7965497003995	14.2597169881033	13.3824443741912	14.1902696806661	11.8753017175175	12.4910727965977	13.5253062252833	13.5782575860772
CDK5RAP3	14.0942365111524	14.0521059280707	12.9673160193112	13.7296868443203	13.5308038404105	13.1103261641343	13.3563411598892	13.2129756435923	12.0357377150635	12.5383092235001	12.4846222002152	12.6791635583826
GSTO1	14.0187707539387	13.5365794381161	14.118476440703	14.1170659071144	13.6087349233972	13.1324763661338	13.3131505435919	12.9113796349952	12.4457107636048	12.2026817927344	12.1552266907638	12.7080696022004
AMPD2	14.0979292074687	14.6730907194459	14.6819275091225	13.6700919044855	13.2971566498726	12.727828565318	12.8654371012027	13.1933349502296	12.2175	11.9476659825804	12.6411550965255	12.5195538665109
FCGR3B|FCGR3A	14.0259880668522	13.2155030788321	13.6520776943239	15.1727549595054	13.5389240971404	11.2841136585151	10.7668211257868	11.2060207265131	10.5006232902189	10.5294640715256	11.1487673080491	9.58329228540374
C15orf41	13.3496173945493	13.4343145924041	14.3459661406158	14.075729773418	13.467513789315	13.4519743712295	13.4353484467613	13.9313112018903	12.7639026271122	12.8168944631064	13.0095400358561	13.1349347778854
ITPRIP	13.5820736249507	13.8326784706143	15.0135339474312	13.5796983083489	13.3317463320903	13.4318605058437	13.6151091959237	14.0037316951704	12.6726319890366	12.5220180161913	12.8891809605398	13.026739431549
RNF213	11.7835112680134	11.8322437963706	15.6345692219668	14.846946003352	12.5009786694853	13.1882812807502	12.9734797041667	13.4918495922797	12.1770023145452	12.3142987583409	12.5930503847537	12.3890824504417
EGR1	15.0879045331001	15.1362842606144	12.1719942781685	10.9922215967294	11.6087347321489	10.8199543090083	7.55128803149662	8.5019124311274	10.0271199157862	7.59570086363322	6.00142460268246	7.17677986219349
CDK11A	13.9891941159546	14.2084007304788	14.938355134685	12.8621489330786	12.131290117314	13.7985708918522	13.6726111720198	13.3333880583823	12.8756970913602	12.9600928792823	13.0910910641166	13.077862178632
HBG2|HBG1	10.0892864825896	6.61207690352268	15.3137085385863	13.3319308326603	11.5280866978575	14.9645714671067	11.6690992626228	11.508919527948	10.6109894250169	13.8426510572147	11.7309436655068	12.6033793589786
ACSL1	12.7644880459196	13.3782016359404	15.8961426970983	13.8382814550778	10.5932214724237	12.9545020853357	10.7262540048339	11.963456197106	9.45825345774814	10.1044487408606	11.1442548926516	10.9767652010433
AXDND1	12.3795052471705	12.5133269704294	14.2378349944367	13.7297604628215	13.7864253767967	13.822106373294	13.818238128384	14.6027315079434	13.368	12.9720143342092	13.6750803238639	13.498835398917
CTSB	13.7768336927548	13.8481298832212	14.1103290340108	13.9908003305648	12.7398536112482	12.713698005696	13.269315768828	13.2807849091106	11.6472373839649	11.9278167458399	12.0446746108885	12.8148153258088
CCT8	13.3402946039287	13.446790943638	12.4457278231107	13.9215269410466	13.1178006719938	13.7987034480591	13.6931638623948	13.5749933609764	12.3767834055712	12.8047022619092	12.7344429300362	13.1851433746823
ZDHHC7	13.0725891557894	13.3528621684655	13.2000969816705	13.653811409482	12.3920103273778	14.0090840765001	13.7642822206483	14.179841892752	12.5043622370738	12.8292520107506	13.2839307852179	13.6136616175679
RPL36AL	13.1142339723746	13.3571020406732	13.6546101893331	12.6180223705088	12.1657837838601	14.1483521968018	13.9200105972092	13.9355043460544	12.4888793848476	12.792131704775	12.995943914348	13.2931270449775
BLVRB	13.701305411347	13.9185553099315	14.5914334861382	14.4423171193466	12.9638386131082	12.9970582876994	12.9429337423275	13.1576032170999	11.5191746384499	11.9985069875909	12.0078912816412	12.6862370280945
NOSIP	13.9421936826157	13.9980556353119	13.8095810122913	13.112	13.6653122722058	13.4359142979427	13.2767004068325	13.2496	12.9213138153659	12.4630740132899	12.9991278225709	12.7734116539429
PRR21	11.764252993011	12.1338071460544	13.3871455857973	14.7405252747836	13.047445221311	13.3589432415372	13.5602246053335	14.2599819152517	13.3595352385881	12.9308485682406	13.1605799010318	13.8471399746318
FIS1	13.8310883227668	13.8299418128978	13.6421218014185	13.8521441875678	13.1274809596256	13.2632	13.9673174242654	13.6059123924227	12.9906813245958	12.8083707531997	12.7902526993539	13.0613151517804
TNK2	13.7747259558079	13.8475149943447	13.7350987260578	14.0943748207158	12.6356453560221	13.310355770194	13.399849928349	13.4832261617287	12.6073013323971	12.6111	13.113509066847	12.8774128837085
PLIN3	13.9488689809751	13.9019498656963	14.8049939659987	14.1801669836809	13.1220860199056	13.0432141635732	13.4922938224331	13.2205420580935	12.2175	12.1174074355674	12.2414851183228	12.7233199912763
RGS19	13.3992017256581	13.834293149424	13.5130602679575	14.5755078748487	12.9343870605391	12.0037927179342	12.6108604466247	12.5594250395017	11.335378978351	11.3595833624919	11.9413510049042	12.2004246843163
LOC101060751|NME2|NME1-NME2	13.4134120387848	13.5556785560897	12.3736000326149	13.3978124911658	12.9604418147445	13.6024222411561	14.2126755732958	13.4121997634118	12.7360690474839	13.0786984467759	12.9672003259434	13.4853018048716
C15orf39	13.4856620686208	14.0368685073057	15.5130762218627	13.6345954475601	12.1878994727246	13.0767231732761	13.4824502656668	13.2840770120338	11.997172444606	12.1171883541911	12.4643606451782	13.1177256822789
CCL3|LOC101060267|CCL3L1|CCL3L3	12.8574212742138	13.3473925301843	17.0815294775643	9.48463445309689	9.57227400449041	11.0682036404832	11.6448843255914	11.6057869506552	10.9628172816238	9.28357149367291	9.75808931575148	10.0232516507314
DBNL	14.3853582413291	14.3845875829705	14.0626350679273	14.2982508577872	13.3346646023743	12.227254701319	12.600496381448	12.2683356424322	11.5256925050355	11.2399236532818	11.7221624254473	11.6805407347624
EIF4A1|SENP3-EIF4A1	13.7780837062708	14.0396166865725	13.4165180469722	13.2531977337927	12.1252354303487	13.853518317767	13.9925151097993	13.8425952212922	12.6467041474986	12.804974322008	13.2005435676711	13.5645492131199
2026-03-02	14.2466767333338	13.0369585028282	13.4862573176746	13.7205289315707	13.6542975025309	13.588842349426	13.2820008645847	12.8799846196502	13.3525252959695	12.3329078123739	12.5530678594516	12.5903523926698
CDH24	13.1363593633973	13.4122803075982	14.5235855062442	14.9384925233643	13.0201514689788	12.9793911299268	12.8503234604928	13.3320789373986	12.3749797133456	12.5681076478474	12.6692663665138	12.5343862705906
PAIP2	13.1162121598262	13.2296350160266	13.3411708415984	13.6437666711515	12.912287746355	13.7718794860682	13.335524303045	13.3710270171802	12.108822027024	12.4189637919325	12.3871293824747	12.9913146776254
SLC35G6|SLC35G4|SLC35G5|SLC35G3	12.8310394960915	13.0345834590392	14.4258216988295	14.4393941299803	12.622173235077	13.5081350391576	12.7900353016057	13.6959970548391	11.8530145806762	12.3050957912247	12.795101928081	12.667016427539
F8A1	13.8597081488144	13.8455455838337	14.8375825713275	13.5480683176401	13.0444775666409	13.1630188690852	13.487565456098	13.096059414886	11.8710423839246	12.4971468111556	12.3985418175277	12.6523248116496
C9orf89	13.0041835949447	13.4322656779672	15.9200515727355	12.2691347890252	11.3942498101086	13.922778692631	13.1690627504439	13.3675626048952	11.997172444606	11.9466799797857	12.2664258095442	13.3387301215981
ACTN1	14.4270547906752	13.8952418998977	13.5969391489623	14.4405640364816	13.6353298688726	13.0879932802397	12.3297050316238	12.165828109049	11.4500406723007	11.2917052437192	11.2947210506154	11.5703877996136
CTXN1	12.3014953161615	12.3930822034456	14.7414069288619	14.0173390549901	13.3480131349573	13.4610061145141	13.3233860832161	14.2980909414929	12.9885203189802	13.2611860331403	13.387182530944	13.1569665984951
HLA-DQA1|LOC100509457	13.1772258276027	13.978980551302	12.3762328275191	13.0964573640152	12.6364339295571	12.9826619047124	13.9724557476681	13.6621145571347	12.2191661125392	12.2492099346083	10.0844378385995	13.720525326609
CTSH	13.3155883638589	13.880770378009	12.5489012215203	14.249276978767	12.9381015525942	12.9984438921541	13.8408328151698	13.4761320862866	11.9959994074961	12.3553722689205	12.8629570383127	13.4173502116517
ATP1A1	14.0069229779347	14.0926268325563	14.4513069506161	13.5858931332855	12.6659302661606	13.8210626635987	13.5647912405131	13.2126369300092	12.2721344286851	12.3642610144542	12.8178191677192	12.5806718653949
HIF1A	13.5609779209945	13.4679882643438	14.8887563556014	11.6767018471321	12.0707357803241	13.878220999092	14.2334319771447	14.068690503811	13.3230488884708	13.2508381712182	13.3478527929459	13.5773067048218
SUMO3	13.2617685749513	13.4261014173844	13.0443803996869	13.1415348902186	12.9191735122597	13.9872965114327	14.1996793957458	13.8666908501143	12.6831170202073	13.0241238806811	12.9906979054874	13.5414466745384
ADD3	13.3497943877776	13.3886368315379	13.5985183665688	13.4330533870723	13.7288780700203	13.4949428671504	13.5457977974664	12.9505803692562	12.0950097595159	12.5917948733173	12.572739767441	12.5577146811795
POLR2J	13.9554553821113	13.9682732793752	14.5476872029573	13.8763540308135	12.9915919828397	13.3181444008371	13.2550408551057	13.3523302819306	12.1641787069093	12.4995020390794	12.6851680806492	12.7879901361967
ARHGAP25	13.9829314774183	13.8625048551985	14.2051372008207	14.0212540309983	13.3245225919069	13.0606740479451	12.4466882087904	12.6905195672602	10.9515658877737	11.4871284615267	11.8159359306984	11.5041216394752
CXCR2	14.3585624148674	14.3384634645885	12.9357754718618	15.4847582713654	13.6879297176068	8.01055517710912	7.69357409016375	8.61120939290219	8.6792506871247	7.61071846550229	9.1385585978715	7.7214588679105
ZSCAN1	12.5463209848241	12.5749493182814	13.9065038272972	13.9411797442936	13.768840034298	13.890337770504	13.9432914564102	14.4349058675946	13.1174526589181	12.9927024488085	13.3277331857878	13.3339029954201
TOP2B	13.3035773840382	13.3885522967942	13.8232810231052	13.2030670877106	13.0709692241816	13.9790150023677	13.4910393609559	13.5129102447376	11.9114220024795	12.2712341100093	12.8707998973883	12.6522185725256
TMEM219	14.1476407551306	13.7136948494583	12.7525683542654	14.1042893296176	13.1612978403832	13.2539486244374	13.7508419353262	13.2123659020269	12.8380049665427	12.4556420603063	12.6135242645567	13.0781785379753
WIPF1	14.4698617059184	13.9242232178607	13.5337253325532	13.7770484873612	13.8006364505896	12.5281341420315	12.1154183047968	11.649885949802	11.1746335115401	11.0791608184179	10.9679158499596	11.2710634499317
SLC25A5	13.1702274047134	13.4761261838992	12.8629333754545	13.0664589043398	12.9222808170716	13.5985063518187	13.8764222896195	13.7721	12.5431609910367	12.7769564879225	12.696840334458	13.2845164492799
PPP1CA	14.2661249193332	14.2931660129906	13.3713085254636	13.9579312367611	13.2130684435214	12.5199565145106	13.0489359912329	12.5729992643754	11.8854731024374	12.091546461301	12.0980427306951	12.5408278016975
CIC	13.7608835406392	13.6399061693281	15.0750565448335	13.9618852127633	13.1049816727587	13.0661353890996	13.5292854696136	13.0003287515426	12.5738851753886	12.3512798855008	12.383479138889	12.5298831538483
NACAP1|NACA|NACA2	12.3648677234118	12.6723272506232	12.1326739124901	13.1984995594074	12.6370644780529	13.5154928844075	14.2336084783052	13.9768586045158	13.2519432733336	12.951271054839	13.6614367954615	13.6198681222881
BUD31	13.3535062453438	13.7864611416893	14.9885151916544	13.0531064316751	11.9485530396162	13.3571442495743	13.7603673982825	13.9426701960251	13.5954559491086	12.7758465839889	13.2695003296933	13.0030254632392
SELL	13.1750299792796	14.1547846593369	11.8305433642114	14.0018159162867	12.3526272257833	12.6371899488035	11.1244642453126	11.4797154837489	9.96772467215034	10.4285496422375	11.7100002791174	10.8950856175108
HNRNPA2B1	12.8042954495964	13.275705108514	12.9045029987159	12.7793584296422	12.5606896020193	13.4628475220904	12.967867692867	13.3291446859075	11.5809802273315	12.1285366971652	12.5474864600897	12.8430136630514
HNF1A	12.3615361580971	12.5785109185597	14.8312322169582	14.9460213109174	13.037449602908	13.1363625057704	12.9881997386893	13.7142006238188	12.6635485861343	12.8347252646624	12.8030611859634	12.5937861395396
MEGF8	13.1516679917594	13.4015127358889	14.6354315160462	14.2118190981123	12.5536934912175	13.1633792164116	13.1769773424417	13.319488303906	11.5256925050355	12.2072174689481	12.2470436187134	12.1169724614594
FCGR2A|FCGR2C	13.819057694191	13.8697903912679	14.3948666884475	14.344607553951	12.558527762196	12.9134705784606	12.291897320566	12.6188122244964	11.5861863749433	11.2495504715468	11.6168425318918	11.0346375518686
PNISR	13.3394926968111	13.1904098715431	12.8630585163491	13.0624895041413	12.8235301506886	13.6231917228605	14.0770750759807	13.9332859640959	13.2038136752657	13.1008053779851	13.5184279112186	13.0552214661103
PLAC8	13.578302112927	13.9652156010688	12.144665313231	14.2999872546743	13.9177471426194	12.7679196153808	13.0188362550851	12.3043849730311	11.6660437461072	11.5822560408736	11.8407405483417	11.4232543475892
MPEG1	13.2564916448788	13.7230441777714	11.8348883981847	14.635285332488	13.0014196444197	11.0867774095767	10.6574034847914	11.1045233272077	9.52266616936572	9.64988399430247	10.0663380621471	10.6110125989187
FAM49B	12.9673988696376	13.5896089580684	14.2398602311554	13.6411858127268	12.5416206578058	13.1624524270458	13.1110661247224	13.0572739326905	12.0437070830165	12.0169436213822	12.6508757346824	12.3709919342348
WBP11	13.127095602611	13.4153539086942	13.8485282780651	13.7279188766146	12.2450621873725	14.1102764124472	13.8472486902164	13.8787388574882	12.4933200380077	12.7469684586319	12.9239394098965	13.1090048340988
KRT16	11.8400420838226	12.6021786506832	13.256535461167	14.0382953826271	13.8204801095312	13.2702912463261	14.2111974875892	14.4697347615014	13.6973636643641	13.3000183463686	13.5049721305689	13.6565566774817
APLP2	12.9886957948422	13.6991814217014	14.4388934723392	13.3536860519344	10.9935625857714	13.6118828522414	12.4518556935438	13.352883658554	10.6768891959758	11.689291338053	12.2420611296617	13.1648819384911
NCOR2	13.8400616599285	13.7965630740082	13.7557351244888	13.8399192950697	13.1338613574444	13.1179953149158	13.8365977600779	13.3124246609485	12.6382075982595	12.7417198148806	12.6721188434635	13.1312806899332
EIF2S3	13.0664636140895	12.5011807317124	13.0013687495155	13.4036384130556	13.2094693783584	13.2894724754205	14.1990920317972	13.4899501468829	12.869518644561	13.0109771178455	12.8610833900037	13.5413319478864
CST7	13.7877837534999	13.6934444187127	14.5552581670857	13.5827175320392	11.9652201051274	13.0479057021555	12.9301399364821	13.8656140734942	12.6801986221751	12.3697887979084	13.1055124216509	12.0765337560784
MYLIP	14.5566053634683	14.5867870742239	14.5186	11.8872426381087	11.9026182427604	13.5122632885495	13.5488507644787	13.5266546359208	12.1718172852543	12.5856323389714	12.7709572489996	12.7092955833892
SAFB	13.4453174217501	13.541910161542	14.1133831305443	13.3378352147168	12.5407785030595	13.7193506266683	13.7467667612364	13.6259934128455	12.4539928793918	12.6868276028212	13.1710028094627	13.0218139315217
NPIP|LOC101059938|LOC642778|LOC101060412|LOC100288332|LOC101059953|LOC642799|PKD1P1|LOC101060394|LOC101060253|LOC101060449|LOC728741|NPIPL2|LOC100507607|LOC728734|PDXDC2P	12.685350872687	13.0866816690055	13.1482570832639	13.2068799749998	12.6072875813682	13.8708954818861	13.4109739277181	14.2527189131693	12.6258738715464	12.7221176850478	13.3966988021285	13.4698930626277
VAMP8	13.6905848180263	13.8033643030385	12.2494749681897	13.575362434952	13.0823574526452	13.2655037801987	13.3138184826287	13.3038006236183	12.422322877713	12.025374017515	12.3976803924877	12.9480912379227
SUPT5H	13.7503971073935	14.1020404685225	14.5105434113952	12.5851975070275	12.1437675590606	13.8642927271661	13.7186073409711	13.8505848212143	13.0037743678851	12.610904311559	13.2813177793723	12.9031756367133
TP53INP1	13.5373951696076	13.7954157842534	14.0884463149149	13.1807298469912	12.6354875896687	13.5619959606577	14.1536911733464	13.5060715579141	12.4653390267242	12.8573314499919	13.0860735045874	13.1438785969337
ATP5C1	13.2119123346507	13.3686335633985	12.8582955151931	13.7934123752604	13.2141252857086	13.4467395401741	14.0296830837232	13.3474637347281	12.6281471689736	12.6734797986558	13.0633303210299	12.8943097271986
TMEM99	12.858292412051	13.3095851132019	12.5936297189845	12.9542467821973	13.5436398927234	14.1466087860191	14.2006277096294	13.8576641747104	13.6314068202489	13.5339907832063	13.1722122458308	13.7162631814437
HNRNPA1P10|HNRNPA1L2	11.320986963718	12.5582112609354	12.2669830022991	11.2289595159056	10.7518380376645	15.0700862292097	12.5770404854502	13.8516728695179	11.1160894421837	12.3488561910533	12.7039658813022	13.8499680888392
RAD9A	11.910128635869	11.8515074509604	13.5684438327263	14.6802432872614	13.3775561107278	13.2941341779631	13.2480685093796	14.0560967673201	13.1347881394073	12.8329920897304	13.2659	13.2943529453074
DKFZP434I0714	13.2049827298314	13.1746123610429	14.4173250036094	14.4440232053441	12.910724131585	13.4055124200038	13.0975534622243	13.675497774314	12.1427850023216	12.3247721539312	12.4714191049093	12.8097758240011
KCNK3	12.0495897802503	12.4670013029093	13.8971238051555	14.7863353010467	13.2321828319678	13.3237741926565	13.1701697220959	14.0033792709216	12.6794680993557	12.5065447401256	13.0062660283379	13.2207543657299
HSPA1A	13.6174931507309	13.823139923027	12.8860248022329	14.9873421917661	13.1611882506244	10.8468688051723	10.2320443598137	10.0132474949803	8.80246041234825	9.41912799483393	9.32554405262047	9.74982415572045
PTAFR	13.5829020348819	14.1991280664441	15.5942429720566	14.2494823848703	12.2292585071775	12.3429374852979	11.3744719239697	12.2811848456492	11.1558485212865	10.8393958214932	11.3470643564088	11.4197636809861
NOMO2|NOMO3|LOC101060373|NOMO1	13.6711696642527	13.6620361323178	14.2099171856019	13.6746115941899	13.1184781526697	12.9691807916732	13.6226762552247	12.9892978284096	12.4886013897598	12.2498096248328	12.7143811059505	12.255172678647
STK24	13.5862860451382	13.5472212593575	13.2914526895689	13.6772097442484	12.9688562520036	13.636861412206	13.6197082127947	13.1283091838164	12.3421215981722	12.3387447245579	12.7271924263621	12.7094998123733
RASAL3	14.3267257506161	14.1614791582028	13.5452352796344	13.4130212613958	13.4557671315443	12.8097574649846	13.4149483253071	12.7747039424916	12.2046839430032	12.2166553256348	12.3518065863647	12.2676
LRP10	13.7683842046416	13.9844164070894	13.9060180517073	14.372128697229	12.5092680588022	12.7671069387452	12.6189903343348	12.8516376060955	11.5456058669919	11.5397326777372	12.151143427667	11.9870428328119
LBX2	14.0117968135554	14.2024981006004	13.1977174524003	13.7039866892699	12.6633017013169	13.047459545627	13.3098062033018	12.5997704629131	12.3531576635936	12.3544432003495	12.272453224513	12.4804758481239
FBRS	13.9270900211851	13.9438585901238	15.5197791750256	12.9160670390769	11.6045497381605	13.3119354374991	12.9566846736731	13.3045000758759	12.4252308694778	12.1991671591714	12.7899901140025	12.7400112715205
MRFAP1	13.8228240690181	13.9368229159791	13.9199793943539	13.3290181491951	12.603743665582	13.7551736051784	13.1639782339356	12.9403069207197	11.6601313371247	12.1289713940103	12.2554365191617	12.3975
HPCAL1	13.628841637922	13.2320868686237	15.0139284877255	14.0452925960131	13.6471160167071	12.5417405473309	12.4062348862793	13.3275189157785	11.4682012937375	11.7608773527064	11.6825376262998	12.2622900744414
NDUFB9	13.3453630214877	13.3540748317376	12.9182982989014	13.2247503669387	12.8432001323865	13.6493373796041	14.2140626993492	13.4396658176063	12.7593008281371	12.7827695152388	12.9278828713771	13.3370788143587
RBM3	12.2551910996806	12.6263249349432	12.4190794104132	12.1723527387875	11.8147784083957	14.1277658133139	13.7330991102094	14.4099504898587	12.7583787044252	13.0350660485763	13.146803775783	13.6793088506776
DDX39A	13.8585891171989	13.9824013654877	13.6803328947308	12.4767347106763	12.319228214248	13.757596389174	14.1781987908379	14.1403551032107	13.3842536146918	12.7282989052369	13.2788871716406	13.0131536343845
ILF2	13.3676472169253	13.5391711074131	13.2211427084894	12.7320738141093	12.4662723856102	13.5772212604623	14.1023760108585	14.0209345519624	12.7488927968132	13.2264682593084	13.2621359577748	13.230962637727
PARK7	13.3598472971303	13.3208811243643	12.4533945996134	13.5931139458124	12.9676034773323	13.2429335438745	13.4795510285508	13.3908025036675	12.075151494825	12.1755850134907	12.7392110989723	12.7653793625657
LUC7L3	13.6883471293017	13.5717014539364	12.6819700629339	12.8040411000727	12.9769728773085	13.6782993192468	13.8471333411056	13.4658231082262	12.5326825698447	12.8095915135414	12.6017536498037	12.906029772566
KIF1C	13.3634457582893	13.3865219593598	14.7274528894686	14.3156686359532	12.606804832456	13.1336853420032	12.7979343540096	13.0722116806852	11.7533289741174	12.083046447235	12.1349005978809	12.0815918485248
DGKZ	14.3481018939314	14.0868031464291	14.0568481351268	13.5859744660932	12.9031426772899	13.0302332075299	12.9696701512301	13.0768342280679	12.348875886273	12.0263076943757	12.7625507573036	12.3112868512181
RPSAP58|RPSA	12.1534160611097	12.7454409947951	12.7362651091804	11.9257970333102	11.4992455646966	14.5340263075768	13.2566049999531	13.9903972377079	12.1732017827286	12.4401369352647	13.0491373162238	13.6271295118382
SPI1	13.4683231671231	13.9388448589293	14.5718523069938	14.685908085901	11.9208573639264	13.3464842930773	12.4252131359453	13.1262965742979	11.754716786091	11.9836822814829	12.4200816444976	13.3541607138174
PPYR1|LOC101060446|LOC100996758	13.444488964536	13.5956999512013	12.8406106664882	13.2934001919925	13.3646697417163	13.6758838524521	13.5837455777976	13.6937175089253	12.9374949510953	13.0366886558249	12.9016302820625	13.2973452129782
GLRX	13.1466850160999	13.3734255323655	12.5769423252851	13.7916503223297	13.195624851476	13.0386195650597	12.8258308129175	12.9895350918931	10.9771556087839	11.756101331929	11.7094450103269	12.669538032128
NKD1	12.3315592297513	12.7360368335974	13.7529015567234	14.2406233937283	13.2945611560854	13.231833714753	13.3577992964855	14.0337225765837	12.7402784717401	12.9415290803131	13.2105846181625	13.5251215352222
APBB1IP	13.8350131251356	13.8729964932795	12.2939673308816	14.8276776468119	13.2838302748236	11.4100569144798	11.732669213912	11.1673934447994	9.83756485085823	10.1436974092138	10.4972493311039	10.3677139500238
C20orf112	12.3567885551215	12.827304026864	13.6075841433216	12.828995968627	13.2574177125945	13.8526567090819	13.759325735574	14.497166191244	12.9679274095475	13.0071987900181	13.5831287773613	13.4666343995648
DNAJB6	13.175529329218	13.4626979855453	14.1094853861622	12.250783403203	12.1098730434309	13.9513497149292	13.9598688704487	13.9949345526434	13.0628537048148	13.0467312971821	13.2369277105613	13.3570315921344
STARD7	13.5643374247456	13.569764216163	12.8996311091956	13.626473097766	13.2187662157018	13.4856689747731	13.6318117848785	13.3313303335701	12.2215099764014	12.6803174377008	12.5918458033486	12.9221561571578
RAPGEF1	13.2785076100296	13.2913435734549	14.7517170084222	13.2286106462349	12.416457095052	13.4717700964104	13.5311534662231	13.669784355609	12.8303469142321	12.7863563536017	13.1181185251371	12.7412104185761
TLX1NB	13.4061116352038	13.4006746753682	14.4855638922862	13.4712456413348	12.9764747091719	13.8280281520209	13.265954423133	13.7736853169627	12.1673084698677	12.4756040372517	12.6345893473929	12.9879512044447
PCA3	11.6025451722348	12.2275257859945	13.5979169630672	14.5385412760187	13.5516048135057	13.0456176903733	13.7510268964285	14.1793566528153	13.561232407259	13.1231242617611	13.486536567717	13.4248945596555
MAPK8IP3	13.1866697104289	13.3950470700424	14.2459669232332	14.162441335968	12.5037470945655	13.7226728473802	13.3857835098602	13.7283914046454	12.4094576173405	12.524002533858	12.8333199242423	13.0282956740466
CLTC	13.1506524548099	13.2637718274647	13.7710209900644	13.9231373827797	12.8538172405217	13.6909235165887	12.7069190846219	13.0361437293925	11.259200833131	11.9127485199274	12.0426922474878	12.5287262409216
RTN3	14.0159852224165	14.0133225853073	13.2665037380173	14.7016446958436	13.0235312785623	12.364320675968	11.9885523649083	11.8701555567985	11.1945412077137	10.8797322599096	11.288786143648	11.5855996043427
ARF6	12.9916478965796	13.382537587911	12.9264647003545	12.4853066395084	12.3371889276162	13.9835407318763	14.0600573986906	13.8019247035079	12.6126686593632	13.044198374817	13.1499788375959	13.4273178259818
GNG7	11.9985762967647	12.300148846216	13.6351775196176	14.4245987286705	13.3887380288743	13.1695938951507	13.3608727562432	13.9732640658766	12.9237834299884	12.8900131929812	13.1727158786564	13.4658488058936
LOC101060373|NOMO1|NOMO2|NOMO3	13.7388206103338	13.8424012700035	14.0791039560788	13.4694832964829	13.1297229106757	13.0677312687412	13.4327372838633	12.5322130879996	12.2607838628031	12.3293186424515	12.1599082003815	12.3400638690765
CCT7	13.9185242060243	13.7661076372913	12.678	13.6749175014151	13.1595434037124	13.3375252220192	13.3965432271992	13.1099483257405	12.4737904595575	12.4868396344097	12.5299827183275	12.8118698300651
ACAP1	14.2063894106336	14.0433264989673	13.8977347525126	13.7746242027071	12.6872448513556	13.130424045566	13.189405487441	12.8910338230886	12.2711650146523	12.1910716760802	12.5157616787123	12.3177315328336
CALM1	13.9827032316152	13.8445598704812	12.700016205049	12.8716545193197	13.1844527707738	13.780126872267	12.9502552405884	12.6682630140911	11.4783170689917	11.9704026018278	11.9803080113801	12.302107321241
PTPRE	13.4720678432468	13.524551271757	14.8191244641793	14.1437218480211	12.7452737041474	12.8953626384528	12.9781222050428	12.7309096748551	11.8206926435444	11.8272046776887	12.0982548328182	12.3960779886822
SYTL1	14.0744522954178	14.1516997087632	13.0040948742133	13.9157791315698	13.0016644803008	12.8300679166415	13.3746228663497	13.1384729870567	12.210089654553	12.3869732927902	12.7430143197879	12.4372301909272
SSBP1	13.3648476044532	13.3232712806807	12.0802454502238	13.2945950980397	13.3078882284478	13.3677706917898	14.0534237035249	13.4634336157539	12.4927657034686	12.9401673702071	12.9952607330977	13.0565064879034
LSMD1	14.068764829896	13.7567721685797	13.9234037189174	13.9284711954347	13.2812106725669	13.1667210076857	13.4040118834257	12.8668712154177	12.2440829383636	12.0356113799056	12.5009178363473	12.4463268035805
TFE3	13.5686018754607	13.6277818126992	14.9394236860324	14.0246784431685	12.7990877584951	13.2358532044396	13.1931313004825	13.4063470831528	12.1707780391345	11.9185432897634	12.3353458395512	12.7539396838005
FYN	13.8116880733281	13.5400847025793	13.9641072620757	12.6581850203038	12.5503500476493	13.9913325233312	12.9386095581474	13.1530915287164	11.9039364111052	12.3158268946337	12.5367280436151	12.3757610877541
PGAM1|PGAM4	12.6657225074333	13.2698425973175	14.3426045270095	13.5823914343435	12.1382106027461	13.3825262739201	12.6355147365482	13.021599447906	11.2067609487192	11.560506634578	11.9564052170608	12.6033793589786
C1orf43	12.8705567933184	13.0713857196932	13.6730710156571	13.3062925961698	12.4940342748148	13.5248180373946	13.5806962685777	13.529540169914	11.9897270499123	12.696391455437	12.9103538041066	13.0633939389298
ILK	14.4137832979353	13.4454912666509	14.0813645531601	14.1303996750453	13.2098932640364	12.8032976836722	11.8597733102322	11.9987729466224	11.6175433875336	10.7957104607391	11.2700806170306	11.324042614103
EPB41	13.1700269500116	13.2354748771076	12.8584210590104	13.5402821438994	13.1125960569272	13.0300638529169	13.5675943084939	13.4388551912689	12.5275499954441	12.5724289165267	13.0120188188353	12.6374820438249
HCN2	12.4069819609437	12.3393386942468	13.4575387819198	13.4826487058097	13.7386790755669	13.8700126526807	13.9501816007193	14.2200976339264	12.9328026856163	12.7673553716999	13.3567449596999	13.3812702165699
NDUFV2	12.0819132878522	12.5345691078429	13.8505492956161	12.4828627095435	11.8239454641327	14.372256358669	13.9348	14.0820284676358	12.6271372568465	13.1926628671458	13.4218	13.5817202069816
RAB3D	13.9389032416818	13.967650944623	13.4811299919837	14.7529663135955	13.1872539123117	11.8387873159587	12.3428543445421	12.0595500518519	11.1999849856657	11.1932979788963	11.9275710960365	12.0394849015823
SNHG1	13.1500427893017	13.5928411212113	14.065900431677	11.6687369745954	11.4915956800398	14.5430745740875	14.2006728514145	14.0691770074987	12.3574267706141	12.6384916066913	13.1262538168976	13.0108354147516
PSMD4|PIPSL	13.5999664879257	13.5015975308646	14.2761655585813	13.6620903540205	13.6567870547129	12.3285957025723	13.0206784678042	12.7741531620086	11.5251504729392	11.9918308161582	11.9097965553195	12.0404593431504
TOMM6	13.421602125275	13.7871026058081	12.4795855077646	13.3011494520927	12.8785574466266	13.2476992732847	13.4692451512975	13.266496946811	11.8956	12.4854823949171	12.5742653977587	12.9586969833401
MSRB1	14.0039457679593	14.4949510367809	14.264796621127	14.8627751232241	12.5548618681099	10.3079384730651	9.68315481853671	9.71648828151934	8.64373790557297	8.43426629261352	9.29478141436202	9.27759064368144
EIF4EBP2	13.6509152040225	13.291886053488	13.0738730754338	13.7354178242422	13.4736162327892	12.7856167760451	13.5468635202085	12.913631931737	12.5199527626609	12.3509072742695	12.5132187524524	12.8308619932226
LOC283663	13.2209390781919	13.4974487414345	13.5267118327066	13.0907366664596	13.660900948662	13.5987728161752	13.4561449639685	13.4342	12.3260300797514	13.1141502774111	12.9778446774333	13.3966987472819
TIMP1	13.3132304588914	13.4348058993403	15.3268110770334	13.4173242776461	12.1975496438178	12.9064145796945	12.7220943447248	12.6713227742418	12.1821687759253	11.6703031731301	12.187682655926	12.6289776654512
RPN1	13.8827649015135	13.9943940651251	12.8178080076497	13.9952166624772	13.3309671293432	12.4662255492641	12.6947910962748	12.4460877774991	11.5159046287955	11.3768891207092	11.8320946065829	12.0837991998535
BCAP31	14.3099943279164	14.1706029377625	13.9670210844729	13.4188775319318	12.8132449971314	12.8670721990375	12.8246596392015	12.6678677332993	11.4670729276678	11.8748931139368	11.8804992129454	12.1500021028437
GPBP1	13.0488018040227	13.2422271177158	13.8888505938566	12.9187818007654	12.274134083292	13.9138113580476	13.887962168343	13.8686270245232	12.7430779465238	12.8510215326405	13.3026428203725	12.9460127024291
ARMC2	12.2190248640923	12.5142570746801	13.6562719844762	13.9762290570693	13.3483982120338	13.345622639546	13.7289108360287	14.3174991799366	12.478557719328	12.7786197443379	13.3220236223691	13.5235543162217
PPP2R1A	14.0043393371393	13.9140988642765	13.8170933566727	13.5684636807549	13.119493777705	13.2912164909217	13.1452427260838	12.5352500701765	12.0185108002546	11.975970800309	12.0704167176369	12.1539093176289
GZMB	13.5779999662629	13.9427651243427	13.0043218189328	12.9174896942374	12.8971013414273	12.6679915114952	13.4585631376698	14.0765666196702	13.0328540235486	12.378954962225	13.1540653934996	12.0727285148213
STK4	13.2762745126471	13.349565504077	13.3720121899879	13.091882622212	12.8581504750224	13.8272486480911	13.5526755953904	13.2860744295051	11.956744190672	12.4288832741462	12.4498068679955	12.6549782469742
NPTN	13.6661326451314	13.1859417166451	13.4791719218759	14.0132319838955	13.4195757168459	12.6035935469443	12.8777990471293	12.5664401967097	11.6093843080006	11.6136563699462	11.6183222535621	12.0490384434089
PGAM4|PGAM1	12.8471771507916	13.1364606034287	13.9673121432951	13.5529030218269	12.6282116200256	13.0236136062319	12.8408543256079	12.9729916923784	11.6536987653108	11.8519043999088	11.9636410126363	12.7235222447116
ADIPOR1	12.9327269366504	13.1163871806792	14.9296586242353	13.1642645651029	12.0507616694405	13.4076867343367	12.9052044152543	13.1127827423311	11.8825138490132	11.9498820273528	12.4572674817102	12.5519178475908
FCGR2C|FCGR2A	13.7342181100445	13.6008899893768	14.1654539843588	14.0902522509024	12.8175625705967	12.8165157951298	12.4092069776098	12.4691838501438	11.5684082832543	11.1549665408151	11.7298489291898	11.0502021093172
LOC101060404|LOC100132999|LOC101060562|LOC101060722|LOC101060698|LOC642441|LOC101060645|LOC730256|LOC100996720|LOC100996740|LOC100996473	13.2449282073989	13.6352111588191	14.8105200369871	11.4949458060983	11.9414235746023	13.707397493065	13.5366714659443	14.0237947275807	13.0902282465508	12.7444174493412	13.0488081314473	12.9095895204962
ISCU	12.414785622751	12.7344413242746	13.3493229151345	12.556597267763	12.0874413475198	14.0655058156159	14.1377943845077	13.9152485192209	12.5767649950149	12.716633080823	13.2480583482944	13.265612520008
CDS2	12.7893655974824	12.8933764506401	13.5082675407411	12.7514931358254	12.5867085513847	13.8854158974468	14.1221972075374	13.1677032230582	13.1464654453719	12.7578304741777	13.3703325939542	13.4493128896426
C7orf41	14.2664530948421	12.7837425703185	12.7748217126869	13.4766952695778	13.9421892850034	13.1318451938205	13.0025639685196	12.4746180818678	12.9360684852511	11.9633510586743	11.5523539773522	12.4497538631376
CAPN2	13.687086903368	13.4936810246704	11.7897848443964	13.4335958401486	12.9903588045277	13.224599891789	13.5806962685777	13.1229840369657	12.1073743158768	12.4235777489737	12.519884397652	12.6253020660223
VAMP3	13.7019988078369	13.7272617715656	13.0998044385682	13.8540365616561	12.6875492495948	13.1693888786413	13.6807897479903	13.2485017649852	12.1738935336976	12.3349816788492	12.4287095334984	13.0030254632392
HPDL	11.9650010526068	12.5704849174801	13.7030906240731	14.6928352251777	13.095722237215	13.1202775262825	13.6920082869825	13.7760254412846	12.3941038120082	12.3866097882961	12.7622830807225	12.9531882772671
YES1	13.9471153157985	14.0387012083589	13.7561394662494	12.0845844883386	13.3389340836983	13.5917139292207	13.1586898488073	12.3861957578428	12.7979560525769	13.0676300195578	12.9148162903909	12.6854066530505
PSMB1	12.9793455530085	13.3207039180714	13.1798452404851	13.2748523672654	12.1139555041033	13.9147289496977	13.4974477908457	13.5566953636437	12.4729475404836	12.5531234175187	12.8938315080689	13.1753439778322
HCFC1	13.7944961790125	13.7232452949472	12.4556	13.5592965772445	13.3633366461526	13.0082206772617	13.5509061018154	13.0181923326594	12.0643729718648	12.3516524002451	12.1243167420792	12.6668060947072
UBE2R2	13.7681193596417	13.566853475089	14.6531611842673	14.4658438750066	13.2307214519415	12.6593309617535	12.727242853804	11.7786624015688	11.5567869615268	11.3266120646938	11.5245301499229	11.7917770971517
TMEM258	13.3632704306768	13.8041884414011	13.5194259054958	13.5012257954332	12.6829765193857	13.2788213402915	13.0625121698466	12.8581488789944	11.6536987653108	12.1119203970168	12.0040476423132	12.5707011224531
CDC42	13.4082376572073	13.4379136279596	13.447142023102	13.2643198144696	12.3677121251899	13.4549632034394	13.0464264096206	12.9365379921056	11.7000580782972	12.3000862300877	12.2840601638684	12.7664594658412
LOC101060409|NUDT17	12.3044204786644	12.4168193351435	13.6996612277018	14.1243643260093	13.3497451764169	13.3061193049139	13.8247550478714	14.2755670712187	12.6162358157544	12.4668616543842	12.8773649961931	13.1977911636634
CSF1R	13.5304631402691	13.537113398421	11.1149322519815	15.2256551016203	13.210846551959	10.587463619611	12.0238835588015	10.8710468659577	10.6895219886851	9.98563018533666	11.4167499611559	11.4386122908346
SNRPA1	12.6109533131795	13.1047017805547	13.2504256005852	11.7695735252882	11.6129076218025	14.3125885586092	14.337275843632	14.2757292090505	12.9963630537218	13.1681275435411	13.627597778398	13.3703324740634
ATP6V1F	13.2188088138372	13.4802573264728	14.635468146206	13.1068111758256	12.2733231248832	13.428352261678	13.3551249183526	13.3745436886379	11.6616117124891	12.1533214249488	12.5690716588856	12.7544346486053
EWSR1	13.3935468566843	13.5642362610996	13.3786799463696	13.1397630066459	12.5285966489771	13.6197070735412	13.9776812120634	13.1092206542421	12.9583229339921	12.9314716980332	13.2758900220264	13.0975805422168
ETS1	12.3795052471705	12.9629276532091	11.8559164791287	10.9981012569863	12.8729474779041	14.2402553213213	12.7765310801459	13.0630722241164	10.4783957482276	12.1507549994304	12.2279791461031	12.282473344693
RBX1	12.8646234460013	12.8397243533192	13.3728912889622	12.9809653932466	13.109532406474	13.5587123858614	13.3324787088787	13.1898976998426	12.1536968544282	12.4815732043914	12.2694426646115	13.0946125491849
DGKD	13.3260615445442	13.3724000206608	13.3420689299961	13.0854535146386	12.7713550740933	13.3842497462061	13.363859056693	13.3924781645621	12.4229049452308	12.1565230501469	13.0683192027605	12.676031850745
TSPYL2	13.4288247571954	13.8607386509022	14.3469954686874	11.7235891713192	11.3148997726387	13.9463029580029	13.8285576402683	14.2415727847276	12.9468	13.0406216921018	13.3966988021285	13.3531806989292
STK40	13.9381383149436	14.0142543050443	15.0965298596207	14.0878994017741	12.8035882735305	11.9607270042909	11.5505600159404	11.7624629083464	11.2202181403507	10.5307805776889	11.2388686100297	11.0678324735185
KARS	13.5715643308374	13.6289988438195	12.6165240246162	13.2855089233404	12.7670407910746	13.3666087369958	13.9248280937561	13.3611589359068	12.2568715914148	12.3831519209756	12.6389698318278	12.8788663696966
ANAPC7	11.9561931223115	12.3917332075749	13.2510951281691	14.1633682397046	13.4352494156771	13.2036796406329	13.4325835390771	14.2676325058632	12.5158662993297	12.5330634730671	13.1335158657036	13.4563273181145
MXD1	12.8036495281135	13.3277752440146	15.892637648817	13.7647424212544	11.362955309552	12.2311887374116	11.0646084592165	12.0114465161749	10.7557061729318	10.3093422463188	11.3577342064855	11.0408186163586
PI3	12.1108157066956	13.7263255931042	16.4877953557995	14.312624606662	11.2334340184808	8.9820170954584	7.33143955069261	8.93142947976347	8.6195675791968	8.48947431584377	8.47857606051037	7.64834712697206
CCDC177	12.7846599722773	12.8031530313006	14.0427756669205	13.5227992725247	13.4466242061692	13.630582735793	13.5325887432106	13.9390712461094	12.3791848258106	12.5042009911017	12.7557094413486	12.9791692977389
ATP2A3	14.5734135488926	14.2604650094588	14.6475418736961	13.1429729450648	12.8769568232127	12.6153060287298	12.0559767457281	12.1130868898301	11.4414485408602	11.1032531157696	11.4376864183239	11.2212299465971
NDUFB11	13.4678340134706	13.5217019474144	12.6724332582084	12.9585249980206	13.2146534166239	13.2732515165516	13.687183403514	13.2072066717276	12.9225491510219	12.5840479527072	13.078030442777	12.7709675199861
RILPL2	13.5431336272266	13.9816169771465	15.6681520862385	12.8388582943092	11.4810982143968	12.980676961615	12.4411965047038	13.1176391615667	11.4477544358311	11.4559372002857	12.1404725390887	12.0863177582618
PLBD1	12.9446114676194	13.8265760777753	11.9408906504144	14.6214249096245	11.9373337199225	12.5385692413863	12.6257304184988	12.7708440560684	10.6807880044834	10.9164556756445	11.9503083767062	12.6228103105628
GGN	13.033127008586	13.0848046081975	14.8171880931934	13.6923989863928	12.5630141199924	13.028877814518	12.8877026264541	12.9055239187804	11.7579498306012	11.631560241831	12.047752883092	12.1697301158089
LOC100287313	13.2184211549113	11.5617646761457	13.0196709039417	14.4053701097869	13.5726870297459	13.3170343103904	12.863043224059	13.0957655749002	12.7916601298377	12.1518248982263	12.1962288781787	12.3376875871605
PPIF	14.1298176102944	15.1204393962116	15.545426340521	11.354196978871	10.9586770580604	12.5959863294911	12.531251923594	12.6686581866104	11.1516406530716	11.1312955407917	11.0709328888441	12.4923938806192
HIST1H4C	14.1844271818636	13.6397641204721	12.1604324801438	13.3588360034552	13.6077702328221	12.0637031406412	12.788714577927	12.2069475079358	12.8974297927786	11.8998156126692	12.1866856156564	11.5880453359109
ERGIC1	13.7941060191935	13.6576933340853	15.1036171884992	13.7039866892699	12.7883424294506	11.9057909707644	12.5843	12.4961526002546	11.6175433875336	11.6117915003404	11.6864930138565	11.9306965878738
SIX2	12.6505725570208	12.9839	12.7309266380238	13.8112634513722	13.1493032807528	13.6380472028434	13.8343882802903	13.7631306588201	13.0379924821499	12.8672660521627	12.8478992720422	13.2784032421617
ARHGEF2	13.4887192698168	13.1635886004233	14.6561973672394	13.8605059210279	12.8042902123456	12.9124296888807	13.0346231944125	12.8818604434779	11.6758442333252	11.4451557247841	12.0576030782735	12.1318303994099
LGALS16|LGALS14|LGALS13	12.8923490195599	12.8973032325399	14.0050553670638	14.4012161354305	12.7693433474675	13.1245667945534	13.0691537522967	13.3861243047292	12.0766318881975	11.8901033896908	12.4666625418664	12.3765329804301
MMD	13.1861742022431	11.6600068516991	12.3512927912568	13.023985179898	13.5199907076245	13.1710281964763	13.0308703660784	13.1450199672814	12.7374735541578	12.4294127549975	12.0291839501216	13.0103381684911
ATP6AP1	13.1855793675615	13.2819080340897	14.8067516012628	13.6966234730593	12.4714081132885	12.9233521471589	12.954223443197	13.1417501909575	12.3619868388002	12.0251405037682	12.6154520327136	12.6132367046578
THRAP3	13.0513071018568	13.1691110098207	14.040564390932	13.5386862365482	12.729543341695	13.5583992747854	13.361276671803	13.1861072418345	12.2958427352217	12.2381712077524	12.7497809483943	12.4655594303211
SMPD1	12.4349465160439	12.5728676503887	13.2613857986046	11.6882642826599	13.2800000192959	13.5094314476415	14.3270146564107	13.4772604608972	13.6664835602425	13.192974729291	13.4199639069991	13.683473494953
SLC15A3	13.8527311390596	14.0660745405353	15.8012915947508	12.9695394720079	11.4241493895522	12.3720913510828	11.9324654892562	12.3473520089789	11.132551874561	11.0175784130159	11.1218959884299	11.8874856566279
NCOA1	14.1024530473881	13.8978575596973	13.6796225597064	13.6259985388712	12.9659732424347	12.2657369783619	12.8076884620452	12.9301246110293	12.1978981947747	12.2888479720352	12.470600125997	12.0191976700265
IL1RN	14.7962106626222	14.376682308333	14.7494171953103	13.340730169325	11.7460044739129	12.7411325002445	11.3606395625326	12.7519477210283	12.5353766084092	11.5800322101145	12.5913938257497	11.2223753490087
RAB8A	13.2933072397723	13.469427707901	13.9933270310036	13.8193806042404	12.8432001323865	12.9369050058984	13.1663840568759	13.0414935071524	11.845218879945	11.6634177926333	12.3530513794607	12.2300527677489
GAK	13.7837936580116	13.8758939975724	14.6222947960747	13.5547326439887	12.6003526964894	13.0417589234158	12.8349334828774	12.6435484711342	11.7134423957321	11.906676885086	11.9361396248446	11.8842327658583
ITGAX	13.1575440504771	13.7399073409587	15.212176822947	13.9946040913026	11.1475339249449	11.9568122321347	11.1022116635592	12.3097155133005	11.0558195848204	10.471686841248	11.7550891276651	11.7197975741172
CS	13.2048848917175	13.3418147566365	13.3625721478958	13.3978124911658	12.6770102194716	13.3731214679372	13.6404905316617	13.0185024030699	12.4827510825709	12.5201964738393	12.9043014034188	13.0393051100181
FAM101B	13.5945248047969	13.2289741893122	14.4989132602212	13.8093140945915	12.7136395714403	12.7799880111524	12.4928374273724	12.0775181096359	11.5804585779781	11.5069968813072	11.6634566708293	12.2107051669787
NUMB	13.3476690304169	13.8314973688991	14.4992353530708	14.121281038186	12.824776061224	12.3062061767619	12.5936370869306	12.2519	11.1438942068125	11.2127037438724	11.5455259432443	12.0658855888756
DOK3	13.693725705515	13.9296365680496	14.6165537237786	14.3746261814005	12.2850376397152	12.4971852147235	11.9378917143359	11.9770807076246	10.8400594776917	11.0908110456347	11.262529965534	11.8634590323913
TARP	14.1229473081936	13.7444063242627	12.2973051585831	12.5529404333769	13.7551096125125	12.9104069924532	13.315903798883	12.0286351371207	11.089939004578	11.0053189580913	12.3843	11.4067238979788
ACADVL	13.7481160848475	14.0137063081021	13.8530085895251	12.9344530216298	12.4860066773549	13.2141031475787	12.9422859402951	12.9223575898431	11.6271727410048	12.0129454116974	12.5470203673871	12.7324939358653
MAP7D1	13.3913990588338	13.7777733480139	14.6953079355481	13.1821293774141	11.9606936040535	13.2438587427918	12.9111753991655	13.1530915287164	11.9786843741864	11.7971598695045	12.389384437685	12.7830499632438
SAP30BP	13.791371943082	13.7167955844437	14.1147501126789	13.0180897205934	12.3121387886954	13.3383461309205	13.7233912819805	13.5180728951307	13.0643467645378	12.8071489590165	12.9889831178778	12.974418343174
CD3EAP	11.9643076413776	12.2969095303854	13.7415112999274	13.8700223037971	12.5204178896419	13.4284807617367	13.572905181429	14.031343043785	12.9020296002277	12.2385740994529	13.4016053803236	13.3018897329743
TMBIM4	13.1936876226895	13.5455541623092	12.7067257332006	14.1322944788067	13.0585492917469	12.2618961556642	12.2281319160266	11.9179755506667	10.9897822467152	11.1067883725563	11.5121665288012	11.4577042122595
NRD1	14.0001169324568	13.8673053024697	12.5557305109512	13.753417177713	12.9915919828397	12.1020180207784	12.5000451283903	12.2485142853511	11.4188665291416	11.4247649465588	11.3823278654605	11.869868812368
TNFRSF1B	12.6130193176002	13.0854305664735	15.0603158051752	14.1884400021545	12.181646094391	13.1541880267592	11.950402508322	12.7365750153763	11.2188780556526	11.3529002596488	11.7323109191875	12.1649722812914
RAB32	13.7086385045716	13.3034106263132	13.3694597698052	14.0695771632212	13.2485737344812	12.8253911901542	12.8053154850928	12.516053393945	11.7096309586063	11.499956392494	11.8208282708248	12.1460842778222
CYTH1	12.9924416621997	13.2896243737806	13.6732137566967	12.3696906010131	11.6045497381605	14.540956496472	12.8278196286505	13.2772261624714	11.8884262986501	12.6214466311837	12.6783745108876	13.0650707752302
NXPH4	12.3387108318843	12.2193740541598	14.0267783096739	14.1760126154144	13.1969083880981	13.2813373634429	13.1635151153161	13.9165800647899	12.3571222530874	12.4198522381067	12.9513199252221	13.0186033152278
CHD4	14.2115603254495	14.2988897187396	14.8937262977345	12.7297199424195	12.5785253464144	12.6812811026626	12.9015432778614	12.7126296185772	12.4465697423546	11.9810361064666	12.3421676251927	12.2399836296909
ISG20	13.3092313605234	13.7783541654926	14.7952557195771	13.1738199866426	12.4146195007902	13.2526912416789	12.7288714789005	12.8928953446021	11.4420229446751	11.5556645087522	12.0024619859998	11.7307053838626
LILRA2	13.6895363334025	13.8566498205041	13.1005476270498	14.5431566352934	13.1475341877569	11.7494447924109	12.2619252682192	12.4855376729831	11.4631166822903	10.9756574724073	11.863130252009	12.1766898606026
SLA	13.4976924632253	13.7126822978154	15.1848798323445	13.9618852127633	11.6814489284132	12.5095473928195	11.8111662760596	12.2168441651172	10.2415846284815	10.3753156766526	11.3017371878058	10.5151957056765
SRSF4	12.8054573796816	13.0995465930486	13.3448494567365	12.7649184193182	12.1216354403385	14.0559445292184	13.3776607314968	13.3422091780361	11.9246345691506	12.4404872014225	12.6511648985968	12.9853391084024
ROMO1	13.7131856353125	13.6327865409152	13.0292933325236	13.5167536012494	13.0874414388499	12.7249716545362	13.6621584104027	13.1423193803747	12.5736230884156	12.2298870376067	12.3176024889377	12.4919190450213
MARK2	13.5613600769201	13.4001716044777	13.2820303298831	13.7861388427631	13.252282464345	12.3810602919387	12.7893150568526	12.5894763647986	12.0673544096392	11.8429233574952	12.5400108453706	12.0559615538163
DUSP2	14.7016095157681	14.5533551510144	13.6456905651111	9.18639962518377	10.6984646689855	13.9074332849927	13.282939237691	13.6896831083873	12.1856028330209	12.2735950870872	12.6350279950049	12.7939731424651
PPP2R5A	13.5907108654007	13.6656684249575	12.7395405304058	13.6371881119438	12.8781574572274	13.1044401958115	13.4711924746765	12.8709122145937	11.9122513425155	12.3557437286135	12.3615582916248	12.5384155966125
MT2A	13.1955	13.1977618560093	13.2838075589617	12.8502797722307	12.802464460285	13.5002097679882	14.0477634898384	12.5112140460703	11.259200833131	12.0690695819642	12.350916790602	12.6556143458391
DUS1L	13.2945950133258	13.3834710869722	13.1267379223658	13.1766311101119	12.4839051543397	13.2823804629266	13.5675943084939	13.3499298602898	12.2348309229467	12.4339934684624	12.7907777267203	12.783535042541
CIB1	13.3681715389579	13.8281975970646	14.4061180756395	12.6611217422127	11.8253293446616	13.7471940698527	13.3757428249022	13.2183167886925	12.3949940639976	12.2476095415197	12.5304543471232	12.7358063903718
IRF9	12.7868839858554	13.0434160923813	13.6551884226061	14.3454245375063	12.3038235193421	13.0148540684547	12.7722849558886	13.0886215693297	11.308541900554	11.414817009676	12.1431476696948	12.0894597864358
MTPN|LUZP6	12.4164764998961	12.3513595258925	12.2452565959873	12.7545355900588	12.7462968403032	13.6057594563832	12.3549116718784	12.8140854786123	11.1030734729295	11.8007111520899	11.9601443527884	12.5719371999784
PTEN	13.7698399868067	13.7812547464695	13.3166173110555	13.8912403009232	13.0748140832769	12.0193464676112	11.984362969518	12.1268136125305	10.8956	11.1451149644854	11.6499193009951	11.8221257773246
MAN2B1	13.6182280109259	13.8371454700774	13.7566110552926	13.619894467507	12.457909943302	12.9690630103588	13.2290731070189	12.9221090164028	12.2311799069802	11.9812768685583	12.4660052318611	12.5498663323777
BUB3	13.7396312947106	13.4025177679214	12.4702508935942	12.8953449523104	13.1125960569272	13.4479655180837	13.617951496204	13.0150879570403	11.984216277557	12.3829696981186	12.3980250243888	12.4143598047883
MARCKS	13.2018486131478	13.1154680823635	15.0730294740904	13.5180329683855	12.0067963611285	12.6437	12.2176413153421	12.5614480532308	12.3568176709958	11.6105469135287	12.3990584256106	11.9479365944005
CMTM2	14.5498807954907	14.488576242053	13.2653679860729	14.4982275889957	13.2122224120334	9.45542360534898	9.03011556574613	10.3512429661128	10.5376414947345	9.21807057082916	10.3368140029641	9.51202065572231
USP22	13.2855563674471	13.4123634647327	13.6388365716503	13.2792854031069	12.1945542797237	13.7990347827708	13.2466699875296	13.3623808750801	11.9897270499123	12.0686164529968	12.5195676833974	12.6128000275338
CX3CR1	12.9244323143182	12.7146169071548	8.97937216720393	14.2356550831732	13.5993824462108	9.89400112549555	9.15464740560384	8.80628049938189	7.5579042714876	8.27370343206322	8.18465258400855	7.61384884299494
STX11	13.3458067709902	13.8425864200408	14.5006838794946	12.9183942903955	11.0739990859501	13.1654880168622	13.0284308689933	13.3436947573209	11.4188665291416	11.5504815984727	12.2023588540599	12.5546486709624
BCL2L12	12.3926219554735	12.6182729316322	13.7273520740979	14.2773501657354	12.6458633431406	13.0961053593428	12.6927384184343	13.5436126141122	11.9551354496286	12.0244397356639	12.3907704136783	12.757104528157
SLX1B|SLX1A|LOC101060729	13.6667721150171	13.2669023838994	13.3503052161361	14.1963462398376	13.4186591953499	12.3837136283869	13.1347910099556	12.3532641014701	11.3864071248887	11.656197839497	11.6873391877782	11.978255377909
HLA-DMB	13.1175640954404	13.2853627939072	10.534390720744	13.5602076331852	13.2452690626819	12.6060194090785	13.2572128208805	12.8955987318538	11.8064881454347	12.2133795910205	11.8029815100047	12.675509237907
LIMS1	13.8876493479174	12.0776566120607	11.8894773269236	12.7152180666777	13.7436645085771	12.9214055891077	12.3030413056222	12.5496963422796	12.6296607129707	12.0256074934715	11.7374946966921	11.7782109357599
NCOA4	12.2602844814038	12.0441320261049	12.531842648567	12.8278959814474	13.4426622400662	13.4529853738361	12.1242031756632	12.8370327284643	11.3911741224722	11.385282840016	11.1847669055516	12.9191571959344
UFC1	13.2637424581887	13.191960774372	12.1846662234222	12.8388582943092	12.5500152769261	13.1965544288966	13.8863352925581	13.7703751371408	13.1571746995717	12.5765779406093	13.1403296204613	12.6153091173291
AP1M2	12.2670478049759	12.4690814589721	13.7935190290437	14.0492505364638	12.7671848084849	13.5973256991072	12.9079718321594	14.1134654599353	12.4659039982893	12.3031710949942	12.8809446145972	13.0709641413266
GPS2	13.3772296595302	13.4924229284703	13.9099602473842	12.9326633070434	12.3835806100884	13.139401098214	13.3678848010338	13.4054582387612	12.348875886273	12.2981548345128	12.9140935809365	12.6351187680225
RAN	12.8067473166654	13.0098462713836	12.241025853284	12.6410644441451	12.8283693263422	13.5214486457441	13.5571956364974	13.1065250744374	12.3179165105208	12.6202103494264	12.8016	12.9474853076657
LAMTOR5	12.9375631609393	13.1982	13.0923514215143	13.3668106737181	12.284232788944	13.660503419143	13.5044131403036	13.4517134751088	11.9498946168457	12.5072136839138	12.3726480280737	12.9065642951059
NDUFB2	13.7765703934626	13.7385151087472	11.1081908054256	13.1446304596926	13.0367329731667	12.5568665262885	12.5571513051547	13.0303128493949	11.9188689547621	12.1887800973671	12.3371441760111	12.4129810002255
CHKB	13.611895944184	14.0390782400813	12.8698000554358	13.8296521532699	12.9256395285562	12.6917396839001	13.0735974143012	13.021754125824	12.2181604325423	12.0595238596826	12.2546755424219	12.3791029777457
EIF3I	13.3117775233247	13.3154665183387	13.2451541861865	13.026024927222	12.8100332658671	12.7045303334687	13.8426275091097	13.6421813648906	12.6472023896766	12.2605616371172	12.7801085010325	12.8178495427644
GZMA	13.6185218509165	13.7653916652417	11.1874804698201	12.2699450130665	13.4214070136151	12.0005695538007	13.189951329828	12.6025652432346	11.7808346815238	12.3475494363032	12.2523902014764	11.6181634276025
C2	13.8936710461397	14.1947835661906	13.032746205417	13.0180897205934	12.5080621518455	13.137934990617	12.9632984560556	12.6479643178363	12.6119031196383	12.1471113970419	12.5801999882745	12.3294725261421
ATP6V1E1	13.2967081493466	13.2720438316581	14.0072084686667	13.3250279485563	12.8100332658671	13.5435267540415	13.0948356755552	13.0113538675013	11.7445	12.2565887476131	12.2637808760502	12.5060965713961
MAP1LC3B2	14.0150369148049	14.1986459902718	14.3824796309712	13.1670943508545	12.3711272391569	12.7780396362303	12.7528365042118	12.6904222698629	11.8469549017076	11.8067011715162	11.8636294208913	12.0940036063955
SERINC4	12.9537230866196	13.2868149581252	12.0296352672606	12.9354747196298	13.4254277016147	13.3944160085757	14.1840557175991	13.1914110989589	13.6134158805412	13.0422380662236	13.0336947558371	13.1983005972728
RAC1	12.6833859653892	12.8166620205645	13.093311826318	13.4901430394002	12.2826217388276	13.4592462119581	13.4933260896548	13.6798170493042	11.9101770980209	12.1812548336825	12.8948086634651	13.1158008272999
RAB5B	13.6412588787402	13.5981145451853	13.4654729326918	13.9063653975382	13.6702493152215	11.7905482106558	12.1440574251533	11.5808088813118	11.308541900554	11.3212964518202	11.4309658621849	11.1462673265604
SNX3	13.0959906517454	13.0275433557156	13.3153374401018	13.5796983083489	12.6884620589286	12.8719309601667	13.0199623313515	12.8898479665665	11.5663022669462	11.847156695564	11.9915417116937	12.4393250338424
PNRC1	12.8950197268554	13.3977376198099	14.1658598187835	11.9921112277988	10.774940140198	14.0524468744449	12.4798018808035	13.2456572151197	10.9418514991562	11.8392089694261	12.2709487298521	12.4417856668412
RCC2	13.2734782713371	13.4467097487653	11.749196022208	12.9921787921661	12.7424929568227	13.2149476899774	13.4779129874432	13.1350453403848	11.8761520770027	12.521521460068	12.3088315990926	12.8203101539242
FOSB	14.0063055715247	14.4049575583346	13.1294454365858	9.10700883977633	11.0266623128696	12.0601689792416	11.401116588598	12.4835175926663	12.467033278619	10.7364677288892	11.4747537186792	10.9835365010824
MED24	12.6568805401455	12.6208659797505	12.7327083242917	12.4498154980142	13.8059735295115	13.834540015835	13.8134048501993	13.7183102985748	13.2769491355346	13.0385408320961	13.024125997753	13.0746947626792
MSL1	13.2736648561899	13.2175984043471	13.1288210764177	14.1984756439126	13.0060644349953	12.8543750545757	12.8453656895844	12.657552231653	11.4580140878328	11.7650783982692	12.0530146886785	12.3350426749427
BHLHE40	13.0027210689859	13.409866684501	14.1614402245216	10.4885034556785	10.5938711895616	13.7667050586113	13.9557022197119	14.1484881483197	12.3525467585251	12.5552273676633	12.7095300232378	13.3948585520971
ZNF225	12.0808474245889	12.4808655574804	13.4993587993927	14.0582483154289	12.6623728279469	13.2057803718205	13.0895797272954	13.8110820835577	12.6743440556943	11.8898469197781	13.0454021494695	13.1224115787505
EIF3E	11.4911033478352	12.2815137180888	11.9080329365369	12.0907882053525	11.7324965422594	13.8672029267192	13.1948546395509	13.5744135150679	12.0621328432462	12.5008461590978	12.7411139626322	13.5369080348127
CHMP4B	12.4125845155415	13.0774816224199	14.7515142310189	12.5439250727794	11.2284217540963	13.756709644506	13.2087473106233	13.4841245056506	11.6995777625341	12.0740446286355	12.6626841870036	12.7755590719951
SDHA|SDHAP3	12.9993403398055	12.8107437377528	13.0209	12.9249678547214	13.1211848986027	13.4334407066986	13.8044619609054	13.0873658757576	12.6093483836086	12.6265351252464	12.7530176915933	12.792913450391
LOC728392	13.3828622393556	13.5609393002749	12.9819098015786	13.0659924825739	12.9388688755897	13.0545815448024	12.9489659084775	12.7411852638412	11.6372399441867	12.0267743064819	12.1018558064328	12.1947463305267
PLK3	13.3023890577546	14.0518924299784	16.1157981338214	10.2661631934089	9.30659950565187	12.7385782460423	11.9248343230901	12.5313442031669	11.8538781747727	10.5786655268454	11.4473759509579	11.5223713674567
PTGDS	13.5353735244242	14.4842315651213	12.230976318561	11.6110772656222	12.526386142573	12.3592966292893	13.7987474542658	13.8518468815901	13.4257913661272	12.6601577338071	12.6593818013894	12.0787488540201
GLUL	12.3840059753283	13.5846733057772	14.8932362004029	12.6429420471369	11.2842326295751	12.8137637928111	11.4803034552516	12.4717903071479	10.7096979829021	10.760233065919	11.7306700592959	12.0129230725271
C16orf54	12.7037467477327	13.0665326561393	13.503940429928	14.0483653730762	12.6430409846775	13.1354181915719	12.8089919376857	12.7345003061016	11.9229896007755	11.514668674108	12.4488091982789	11.707171237291
TSEN34	13.8005949437033	14.0563692667362	14.2015294194261	14.4317665240312	12.5157968799125	12.0005695538007	11.943513421484	11.6066121505622	10.3618112359365	10.260980185545	11.297679373585	10.9326596492018
LCP2	12.8808817935454	13.1169995876478	14.8202205884141	12.7829104853594	11.8114304389079	13.1019716521715	12.7274935312419	12.9518797148883	11.2467617008707	11.3341719835498	12.1766771293019	12.1035148399258
DOCK2	13.2174515515506	13.5512	12.3496861401931	13.5007081888494	12.7301344889795	13.1727167943782	13.2254390837417	12.8971171639475	11.3858101408166	11.8998156126692	12.2739561518667	12.4816720915622
ZBTB43	10.5960630972444	11.3519958508451	12.516172324338	11.5606504248087	12.0814310720402	14.3270206258801	14.4975443865577	13.2461868584609	13.8577126005139	12.7469684586319	13.8207535251702	13.4181626557083
HBP1	12.9782011227014	13.2566568243378	14.2226519437214	12.673268624317	11.4761731341785	13.9361260438518	13.6244272315449	13.5846058698169	12.0862175926575	12.563773396884	12.6511648985968	12.8383520485792
SNRPN|SNURF	13.4617874464247	13.0424492946218	12.8196145919073	12.897181535758	13.1662207859978	13.2473593856552	13.1854875622042	12.7679884534275	12.3857681945934	12.2365585151772	12.4816986034322	12.1718067443337
SEPT7	12.574765275162	12.7491328891663	12.6816862931282	12.7178926280001	12.9087672267886	13.3990571755471	13.4348112397194	13.130677589176	12.2766497679359	12.6222187697076	12.6755343879372	12.8178495427644
VMP1	13.7290567045908	14.0289721017451	13.6562719844762	14.077986883709	12.605999891717	11.5349822950483	11.1252254874721	11.5031701360355	10.2455385192886	9.92684463663082	10.8347416192105	10.6855768778596
IKZF3	13.9280386465946	13.6836939687517	12.703235081248	12.7041702568776	13.6337510819005	12.6580894854973	12.6276120129116	12.0521482602318	11.4523232909918	11.7675931665108	11.9318617217623	11.367399932148
HSD17B11	13.1585547495811	13.4364423805008	12.4882112045167	14.1092777407302	12.3882698659463	12.5410276109995	12.9886181119953	12.7752545127824	11.5872253539049	11.6661159866234	12.2838736942081	12.8843039378037
LBR	13.0837	12.9868010718432	13.396340245002	13.8661429108276	12.782512201054	12.9426746246068	12.6594920479855	12.5182477424677	11.2395107709848	11.3728574043429	11.8969301931201	11.950703621019
TLR2	12.991534465882	13.2326520895927	14.9813853714378	14.0656163452116	11.404285345764	11.6673284051622	11.3052885818129	11.8725588506072	10.147519437615	10.0439591140167	10.8448893805833	11.0814676955219
AP2M1	12.9639342461435	13.0471697142273	12.7128488420107	13.401976263779	12.5166537397362	13.1525294502899	12.7807647439213	13.2826578104705	12.104474527718	12.3221134036446	12.5864127060165	13.2235456111215
PILRA	13.1108961447133	13.6765107548933	14.390054891974	14.1301765935886	11.9669765825308	11.755740081666	12.012613841514	12.0742406744025	10.5225135621425	10.5856497943199	11.2700806170306	11.869868812368
MAP1S	12.7927545847171	12.6540175722856	13.2936826476747	13.1316510584184	13.1377652084694	13.3346940667979	13.570950818553	13.7134826198005	13.0397012427875	12.5389636031052	12.919385061482	13.4463137408525
KHDRBS1	12.7956159841969	13.2424142295149	13.1749140000244	12.8701859166252	12.5752390234718	13.2012249152202	13.3181525612988	13.1674236199081	11.9715406164684	12.1531077303912	12.254865824462	12.6615377839862
TBXAS1	13.6189624981451	13.7950969311777	12.3985060332401	14.5543814715437	13.1076000983704	11.1833447806491	12.285441820471	11.989154617482	11.1558485212865	10.9640098692281	11.0086560044045	11.8758863468145
RASGEF1C	13.0766584486122	13.1436913326455	14.1210948508047	13.8903185119858	12.7212417437367	13.1442078460146	13.0246618770733	13.3467848099848	12.1037486689745	11.9412448872688	12.3949203714041	12.5894649362598
PRDX1	13.6064250877903	13.4618947327612	11.9725527716357	13.9400348207904	13.6116251319304	11.890698151334	12.1335025045822	11.3787505005316	10.5419347848493	10.9503010701048	10.6560953343004	11.371019460318
PSMB7	13.1912204188282	13.1364606034287	12.8479635667412	13.3771874782698	12.6759367283653	13.1223443213912	13.7272822558115	13.2937804013925	12.6674835643574	12.6497440637026	12.7575906823325	12.8257841329364
COX5A	13.0299273269472	13.2354748771076	12.5206216246234	12.8979679277144	12.7173711320457	12.9468073320756	13.3831605539682	13.2492285405426	12.1353459309474	12.3132	12.2546755424219	12.8033798363171
TBC1D10C	13.9440705705982	13.956117580728	12.8416270904315	13.2107883031101	12.9992142500607	12.825130926921	12.6065057009123	12.722750358764	11.7565651271066	12.1507549994304	12.3931926729223	12.2704803548476
CCR1	14.4061444105559	14.2918106345601	14.3208571473261	14.0626385787569	13.6759367889929	11.9030809582255	11.0075386501978	10.3800033572856	10.1418736512203	9.58799362523272	10.5694026410862	9.87673036814735
SEC14L1	12.9566313412247	13.1167954809288	14.373371640276	13.9793285024052	12.3420311661421	12.7127135123873	12.5578563058215	12.2569486646849	11.1572484213206	11.1502633094116	11.8573773606109	12.177132961701
TRIM33	13.0513071018568	13.2087200582429	13.7966016331321	13.0606177655212	12.8681215093361	13.0846812772514	13.4731371744054	13.269952007438	12.460811270034	12.2446040104716	12.9059986365289	12.4036709960934
ODC1	13.814896882687	12.9474019715485	12.2171408067584	12.5842206722635	13.2631475730605	13.2108196426264	13.0071139609375	12.6648996696233	12.6767863463895	12.2470089358906	11.7930577625699	12.4424001698983
XPO6	13.351032735519	13.760369886186	14.8744259755469	13.4487023096395	11.6310629850477	12.9099775706242	11.5612877417935	12.5518401494928	10.9255140616493	11.1369256563157	11.8389647321513	11.8840518342396
ATP1B3	14.1687619531838	13.8102598481898	11.895362816828	13.4236183110831	12.649617919609	12.4219927516006	13.4018931428807	13.0553863480047	12.0784802457651	11.9648128291387	12.2119953589814	12.4452235178043
TCEB2	13.0852943472187	13.4181725364857	14.0676932360785	13.4435048393336	12.0312268585006	12.9790402496992	12.9003208309836	13.0022897143075	12.1893708788499	12.1776875460235	12.4742001612995	12.6583675384722
VAMP2	13.6160223052988	13.7886409560016	14.3213126288297	12.2205077677915	11.7253983964883	13.6050774716947	13.0876282101391	13.0937070170611	12.2114379233708	12.2942842688076	12.4978663436457	12.8734993681769
PPP6C	12.7038852191852	12.8391058701169	13.5705910351571	12.4742762041962	12.3990905970112	13.3608746583165	13.8854369193957	13.6740223342227	12.2798663799485	12.7378776362235	13.0218915796992	13.0741397492166
SNRPC	13.4181460083497	13.4371781917758	12.4723851636432	12.8795	12.645706690291	13.2539486244374	13.5009713279999	13.2548322224276	12.427262981763	12.5379819222372	12.6675521693154	12.9314660452326
PRDX5	13.6565064326835	13.6020570024551	13.8120462634563	13.4769584391408	12.7369153309366	12.4082455832253	12.6973528433887	12.8306018249039	11.6022070643436	11.7762217452244	11.833624131052	12.3672428970293
VASP	13.167820108877	13.4421554922367	13.4871506997206	13.935062961318	11.989618293594	12.1081278002913	11.4791129582356	11.9012585227104	10.6690598277782	10.6770676886105	11.5057848712563	11.7886874877202
IQSEC1	13.0168342507416	13.3025135777855	13.8374891656449	13.270709287844	11.6948354843135	13.9263318782232	12.7496311636445	13.3331387941717	11.9377272290947	12.1987531095902	12.5924482196554	12.9839046582232
RPL24	12.3156997922514	12.7609361060267	12.7117374806581	11.7615305243033	11.6196230505389	13.968860895151	13.1305321624434	13.5932703585598	12.5218558249293	12.3141076273728	13.0112305769731	12.9906426100555
CORO1C	13.7073268210019	13.2457781000925	13.4047891487829	13.9059093834209	12.9591817087849	12.2802395558774	12.5778748655468	12.4148634013423	11.4059702714289	11.4233480056626	11.5292573178488	12.0882037960726
USP3	11.957587428233	12.476736157938	13.1374341655497	12.1981217807725	11.1911232038573	14.0584930271605	13.7880314496228	13.6821675777854	12.3616832820994	13.0114487137823	13.1632180398277	13.6428808395037
NDUFA2	13.2689929816553	13.5401608101081	13.1535870920015	12.9655439316654	11.9594337180934	13.3496091309535	12.9858965134872	13.3632356186217	11.7680639159317	11.929065356096	12.4249940254474	12.3806
TGFB1	12.9572122892223	12.5216763990529	13.9317203430154	12.7585822409774	11.828093129287	13.677650784999	12.2816911806092	13.5409170140547	12.7055366356673	12.1276669096989	12.3101140131437	13.1804361832442
TRAPPC1	13.8499183471237	13.672419705328	12.893763041511	13.6440010651498	12.8167279190875	12.8972208349866	12.0070490512143	12.0401342095058	11.3110595395566	11.2967439407566	11.140140413175	11.8566518700327
NDUFA3	13.7780837062708	13.9289973376722	13.2102647962241	13.7480481807043	12.9091588201193	12.3151295956831	13.0489359912329	12.5200008216588	11.7812886959331	11.8513776479722	11.8460549189345	12.1639294100402
EXD2	10.9560140302011	11.0961346428136	11.8899687021526	11.9822574716885	12.9280890361378	14.1026465387943	14.4628465177607	13.559681295971	13.6796945404053	12.9578924752101	13.1869461397995	13.3889413517793
AUP1	13.2553583585361	13.3442576870886	12.7201	13.0603836273562	12.2631474920562	13.5038323441229	12.9774900156953	13.6690932727266	12.0300182354788	12.3400594748447	12.5871685276191	12.8848465690251
ECE1	13.4672631253633	13.5539458302032	15.1855304382922	13.3516783181481	12.5836043988339	12.5989579173634	12.0378985587638	12.357927386098	11.4153607852428	11.0867889121336	11.6248150577406	11.6170752110569
CCL4|LOC101060278|CCL4L1|CCL4L2	13.9492778625804	14.5249486301138	15.3267430239827	11.1109261877076	10.8905055365712	12.4390157850196	12.8580145636311	12.5222985096933	11.3047571855578	10.3516729290204	11.422520901674	10.9284547775788
APRT	13.5853844179271	13.6165655621744	12.1960361904793	12.9123096641993	12.5990587993642	13.2206972908392	13.3919643352453	13.0829993820402	12.2821137485539	12.2327211303121	12.2527713433686	12.9143812895732
GLTP	13.0653862708157	13.2419	14.0056789632424	13.1337	12.3089767157009	13.0716858371118	13.4363455836088	12.962635469831	12.145608874927	12.1764263943629	12.2703841397247	12.627357231746
SYK	13.4806600535828	13.6913899479647	11.9620757500491	14.2947717817376	13.0128822474498	11.5392725512028	12.0677062465119	11.9377836025171	10.6473073699953	11.0845495389832	10.4246833603184	12.0256091374296
SLC35E2B|SLC35E2	13.7248323640848	13.6555872782865	13.1005476270498	13.2642181656921	12.7973964393155	12.5181061176299	12.8105308918876	12.1869481669156	11.8956	11.3997652947013	11.733676877914	11.4572178191529
C1orf145	12.743760714434	12.2252555136232	13.4918521307756	13.6142430606742	13.1305067710445	13.3767220547537	12.5605321705606	13.6015727094456	12.1641787069093	12.0665756102474	12.3733492685061	12.6865482957498
SDCBP	12.297647017722	12.939345203644	14.1176899898392	13.612726948928	11.8828170089447	13.0770510849388	12.1517364626388	12.370249127343	11.2047314994493	11.2654537785045	11.8913107759582	11.8789765208572
TMEM176A	12.7556985926295	11.1617106788051	11.9131183395311	14.3118871819077	13.0321860328797	12.8779030747152	13.646070696552	13.3612811768193	11.6068251040124	10.9659576789722	11.0859839987338	13.2174551712124
CANX	12.8391308874338	13.2470841566319	13.464318583281	12.9321515520136	12.2458891836545	12.9643438562548	12.8192599610931	13.1647646849189	11.1196842461129	11.4938942198985	12.2732048837534	12.4117263969118
IRF2BP2	11.9922409657997	13.2865427886601	14.2491303023332	11.2314573660825	10.3223674559815	14.4997438032077	13.0835214113623	13.5654224877247	12.000295888739	12.505540742384	12.7633534891886	13.5185510570467
MYO19	12.9067365180705	13.037928985749	13.8002659432354	13.2566762168572	12.7674728003898	13.1208607683746	13.3047751116929	13.1342586897592	12.5367217435042	12.2597679340357	12.6919298095324	12.6723695790067
ATP6V0D1	13.1210939490078	13.4268425217125	14.8986181343587	13.8700223037971	11.6527391631221	12.6970829091952	11.6470061817643	12.1836339074549	10.8127822311724	10.9824087327235	11.5038648561613	11.8143608958735
CD22	12.2711653929125	12.7244292140203	13.0781915337668	13.8086172561274	13.3283342060499	12.9643438562548	13.2391296169912	13.5369182601111	11.9535249123207	11.9592013144111	12.3576655158957	12.6293015338528
SEC11A	13.2054718210534	13.4299674344716	12.9572697353174	13.0826893881531	12.0739992706547	13.3896718664308	12.8079255452298	12.9284755517842	11.5294810397803	11.9160266837709	12.0391613060522	12.7855705963417
NBPF3|LOC100288142|NBPF15|NBPF8|NBPF12|LOC101060226|LOC101060202|LOC100996575|LOC101060238|NBPF11|NBPF24|NBPF16	12.2582115702296	12.9747	13.5699778751138	13.1024966383842	12.1335261609907	13.258581798633	12.7258633489894	12.9818437403901	11.4141903081089	11.9454	12.229722727813	12.5345015504031
PRPF8	12.9648589595113	13.2336877530747	13.9228035478718	12.7604571917262	11.9200803985428	13.5709486407392	12.9916476965967	13.0423323857862	12.2539304095068	12.040240819617	12.7979775454004	12.4563402904899
LHB	11.9997046839856	12.4326485191282	13.4768023692421	14.445099694204	12.7228761892282	12.9666463722116	12.9588214664772	13.6665234896335	12.009238304906	11.5384243190576	12.4258392998163	12.5091500910168
LTF	10.7520458004138	11.1840926861125	14.0488392575794	16.1107857634558	13.4267046650535	11.1121720810128	11.9736246202864	9.8590430698627	8.90267813364382	8.33527388251716	11.5677530949483	9.52414646294555
STK17B	11.8820117910352	12.517198454638	13.455382418518	12.4965995376445	12.261103724784	13.7183699846772	12.7184415901844	12.7132043902596	11.0987085897609	11.6619166125553	12.194642712049	12.275179145255
SLC38A2	13.2239354852752	13.1295981437661	13.3694597698052	13.4334150446833	12.4252451133813	13.347526657457	13.2421154059164	12.6635124807112	11.3917688909812	11.7633994476602	11.7331306496101	12.2201964142099
SELPLG	14.0970332781349	13.8279	12.7756196586583	14.1628230741979	13.3018366885594	11.7588774547556	10.9463960556111	10.0495	9.86523864025987	9.68104742655438	10.0024989464049	9.93098379578437
OR51B4	8.27348967114833	8.12308154112457	8.69664954728038	8.74389433213971	8.5563606976443	8.51399053799448	8.84658594359042	8.58799816448844	8.44258763569114	9.75613235123111	8.52475546370683	8.52712794853829
SIGIRR	13.6179341122229	13.6816255558501	12.9132311542209	12.7260343117345	11.9764746105399	13.563790946677	12.8462893565676	13.1036783245783	11.8573273921345	12.1415209685289	12.8283419784117	12.4667681010009
HSP90AB1	13.1121487351703	13.4951735897127	12.8281010073869	12.3271168405766	11.9732323170611	13.6590074292691	12.7291218735386	13.0908348365631	11.636236379128	12.2716278746998	12.2145412158963	13.1224115787505
BTF3	12.4971516277223	12.7618500992689	12.7552677397431	11.8702459686407	11.6814489284132	14.0740735554527	13.0002835798731	13.5856525457265	11.6482333282565	12.0774268960412	12.7125811787257	13.0844912023061
LOC100288142|NBPF15|NBPF8|LOC101060684|LOC101060362|LOC101060226|LOC101060202|LOC100996575|NBPF16|NBPF3|NBPF11|NBPF12|LOC101060238|NBPF24|NBPF14|NBPF22P	12.565803208926	13.1701932892818	13.604518644985	13.064592311663	11.7886261167377	13.4924456042105	12.042741601693	12.7395874583656	11.0007406232009	11.6969344568515	11.7183037617578	12.6531744419975
SMEK1	13.1865706224368	13.1458935131007	12.5665291000433	12.2589684069553	12.433617027533	13.6100712207945	13.8003569483754	13.3548	12.5166845187168	12.7576899320736	12.7200431341196	12.8816783387442
RAF1	12.5883298795776	13.0200322323244	15.0545743335693	13.0547528809389	11.7395599360653	13.388351276341	12.4648443649587	12.6010132558957	11.7584111031085	11.4905153068526	12.2070868177486	11.8625410203568
C1QTNF6	12.3760335692362	12.564361141359	13.1138	13.4120123155441	12.9869002871474	13.6719817312415	13.3607111586244	13.883768319441	11.534876031685	12.5867403750628	13.1210441671276	13.2750954471807
NDUFS6	14.0183811034423	13.8563442191077	12.5209389073543	13.1991377578072	12.5468310729749	12.7904240138733	13.1557124123639	12.5473344692556	11.9699482992165	12.1616309171747	12.129514609197	12.3214776783097
BAIAP2L2	11.535038064879	11.8576276610326	12.9972698794659	13.2964850111541	13.2232872913871	13.1932306936752	13.3741426190009	14.1898567659462	13.2181368748213	12.7169	13.3985945469652	13.3707844926126
RAB11FIP1	12.8730218374818	13.2895338320533	13.7833721865031	13.7658198126968	12.1911233738508	12.2981651400911	12.2627903101955	12.1100348546154	11.0543176693228	11.3823688209696	11.8107681126507	11.9127160202073
PLEKHB2	12.9886957948422	13.2468976494152	14.8799402475746	12.5698172525395	11.9396356895047	13.0743162068032	12.7927929141646	12.596139523061	11.3397009406302	11.7048289151258	11.7199587384754	12.1155861010226
OGT	12.9099810341225	12.8963522663762	12.1421924980671	12.5192643165971	12.1362048471997	13.4419524920107	13.3594177228889	13.119230247984	11.945039968634	12.4606585082929	12.6666943064241	12.7094998123733
IER2	14.2098062435712	14.7514682146632	13.6433609447926	12.7749417000692	11.8788239391543	12.1800043448523	11.5629743251668	12.1384151741487	11.214850317304	10.6194541855862	11.5153468028952	11.6386850963163
C17orf76-AS1	11.851087212152	12.0953748078872	12.3376689429509	12.2158900984053	11.9906054267192	13.8632791056244	13.2419399422072	13.6904617032515	12.4664687489482	12.5962030793436	12.6910863246231	13.6561858960042
TOP1P2|TOP1|TOP1P1	12.5390438032233	12.7012022761189	14.3070334177694	12.7911177289288	11.8678528196459	13.1661560176294	13.5167941320809	13.1313228435839	11.6787714443436	12.3449323708397	12.6695518683143	12.652962081259
VNN2	12.142423626463	12.1265265819652	14.5234271644816	14.521590054981	11.9861579984284	10.8342504682788	9.4083627867042	10.3378877414434	9.1921	9.01292748195308	10.8808414330975	9.45566990126364
IL10RB	13.584933392928	13.3655445860802	14.4346896978793	14.154346564954	13.0222044404137	11.5750014709089	11.9204554647536	11.5641257196262	11.0100677197087	10.6835925016121	10.702594236243	11.3976268136062
QKI	11.3636814719654	11.8714854150669	13.6304068355396	13.8686857603554	12.9854155236393	13.4322450382139	13.0067009178491	13.9249985456514	12.2060372708252	12.4654854805098	13.0362431225023	12.9566336827376
DDT	13.3520933300939	13.3703468091246	12.9428969367075	13.2164734142173	12.5061651164861	13.0147399576369	13.3181525612988	12.9709103650343	12.162785519015	12.2583779018457	11.8827172702154	12.495239617935
RAB7A	12.6762053720469	13.1743181770349	14.1393435223571	12.6853140881163	11.9393800965384	13.6231542977261	12.9985189891873	12.6934354409975	11.0677789482528	11.7594742812906	11.8656243714862	12.183
VEGFB	12.5732501938908	12.7217475414712	15.1476099986873	13.1436361794201	12.2751471409012	12.686663130892	13.0969715103128	12.602151543039	12.2907495248967	12.3587119694333	12.4567713058008	11.9904084219516
VOPP1	13.2297173628376	13.4446783748603	14.6333420648865	13.0374896870295	12.1820782332291	12.4295453086473	12.5425511150768	12.4114437660725	12.2305150919866	11.7569453086417	12.2957594300474	12.3695710323934
CD3D	11.9915605272865	12.3243913934134	13.4203498937551	13.824008405155	13.0625447031121	13.0259933694692	13.1679549286099	14.0996105309036	12.3833777167177	12.2724150815169	12.8461322512942	13.0851209521492
RANGAP1	13.1075505765594	12.9459091127974	14.0313512042332	13.7014363593181	12.1949825699149	13.7242787565291	13.0584327862379	13.2881976782366	12.2499994834452	12.1483984253941	12.5874707453292	12.0064548510195
ANXA5	12.6874531649729	12.9834466594698	11.5568243182291	13.3310576446238	12.316868940931	12.4470720662073	12.9504700173219	12.5393614897065	10.3954157010826	11.3728574043429	11.699413459186	12.4098424438772
ELF4	12.8969589589307	13.0043400759853	13.9580275948751	13.1774949702489	12.1439893926073	13.1540844215634	13.4195325383642	13.1278781466329	11.9857929329141	12.1595048365464	12.2266215685829	12.8931414594411
CASP1	13.4409211659699	13.1155702333545	12.2067257040901	13.8952498081265	12.9425718612235	11.4384087537118	12.694406441538	11.8734162004029	10.8029778882748	10.9640098692281	11.2434786146955	11.8196682637189
CYBB	12.0876553824423	12.4762589273401	11.4328136458648	13.5412891756592	12.2888545616787	11.9831789034841	11.6800202115895	12.3287190026149	9.46956627766232	10.8335402952582	10.9149563427414	11.8496271361313
ACSS2	11.8895795903628	12.1200239800021	12.8172914248726	13.3688920144318	13.3599985080412	13.0757389903612	13.606003290034	14.2938063569296	12.6501882342136	12.7196666233733	13.0325853648018	13.3167121557886
LOC729041	11.3587650599797	11.6577638850382	13.5456251642253	14.1561554186453	12.7056965977403	12.6838669820878	12.4618341621305	13.6090041933487	12.3713655502511	12.4362783823557	12.823859920067	13.087951429849
IRF7	13.7961856519966	13.6555170239722	13.8308505163696	13.5304265654146	12.4184757492143	12.0824434558528	13.0889945492273	12.308828456498	11.2454460575597	11.0601401939034	12.1293070537187	11.1582868172024
CBLB	12.0006067588235	12.1426560049209	13.7177655971118	14.0187858217672	12.7612682708833	13.1840761097382	12.9235908392157	13.6568458281343	11.9458502120108	12.1492558070839	12.7422001875924	12.6632257375301
ST6GAL1	13.3535062453438	13.2031552341442	12.1247630865906	12.6294315813497	13.4091849939605	12.2697588674816	12.3657421946453	11.7801261029237	10.7967038899676	11.255136591993	11.0851281524224	11.0751417587351
CYFIP2	13.7807117785064	13.7626546798179	13.4695058981288	12.9740212677086	12.5014981540209	12.7406496095189	12.725110335354	12.605870579635	11.9426065050039	11.6504563077026	12.4582593213708	11.7004054329184
BNIP2	12.1397647435714	12.7356381215003	13.4252737528991	12.2667013828727	11.5775401052897	13.8224975690996	13.2761	13.5553069341098	11.6990972872403	12.2478096875486	12.4131078889138	12.8204992578217
SBNO2	13.3847636809004	13.402685205212	14.2587692798465	14.0204718852469	12.2254900370787	12.5145596010773	12.2394259539855	12.6849631183714	11.5620809883961	11.002000458169	12.0200330029503	11.5050631602322
WAC	12.6884331873363	12.5672022209715	13.0848597018673	12.739697481779	12.0948044014707	13.5883056871719	13.3688493118366	13.5133503391124	12.1780370879558	12.5776929499419	12.6114453219741	13.0587525258216
CD4	12.8879680785138	13.0634647046442	11.0916253341755	13.3084630348593	12.492989726594	12.5898715420719	13.1519819546907	12.8421218561744	11.103799671704	11.4226390127424	11.8743199896683	12.4614423590592
PSMD13	13.6795023401495	13.5040186632016	13.6039197392489	13.3432344389013	12.4515	12.8789064764972	12.5884021245305	13.2834320935044	11.6027209107142	11.9248156646926	12.2458953398037	12.4412938760272
CD83	13.7310963073342	14.3009123676839	15.5090434486253	8.93990353243226	8.1279268750183	12.9934726375083	12.645498482966	13.1786350569924	11.6714422511012	11.5892229896823	11.8795123138312	11.9994564890763
FAM26F	12.7199953000781	12.7275069879091	10.8970911830359	13.9882178795334	13.3172624995287	12.1744985937262	13.8301925956665	12.2785982548992	10.7876934399517	10.7725270740968	11.3605662228134	11.4227561976502
SRSF11	12.8884555071707	13.0021317002703	13.3764900049942	12.1229831958617	11.8713405087324	13.9221095935593	13.5368145095403	13.2503510194978	12.0851147947831	12.5542566950213	12.6099585266251	12.7442039329341
C12orf57	13.0977832481091	13.0502724766887	13.1365026978039	11.3534327281842	12.0719021602941	13.8273136227582	13.3667587246627	13.3323907402356	12.5155934565434	12.349042773758	12.4571021085294	12.8232384849152
CRTC2	12.9488239819787	13.0927134164907	14.9938109549166	12.3706351503895	11.4053961082545	13.5515722324216	13.0198599970941	13.011743286401	12.1835433797502	12.3020150434799	12.5753323799301	12.7120502379916
NCF1|NCF1C	13.0409308869603	13.8070375948868	14.6165908358165	13.9685135761015	10.8481097230563	11.125972063743	9.4945468891131	10.7387943239584	9.08437304934431	9.14773872461032	10.6908279896318	10.7548937855542
SON	12.6972235592874	12.6179845273713	12.7696242787975	13.4910119515671	12.6845023738297	12.6098772158101	11.5979446002223	11.5536801511397	10.0453794154098	10.6175968006426	10.8413457774207	11.4107487063109
SRM	12.8908901834629	13.1631933325188	13.1498991843744	13.6411075326399	12.6494616739364	12.7556811338765	12.8597308497192	13.1010455604726	11.7867257551503	12.1070744797867	12.3606744915991	12.5182720627363
ZDHHC8	11.1550840074123	11.7219714605968	13.5506840989218	13.887813541057	13.0302672360354	13.007590062817	12.7498779813299	14.0987309987678	12.672142453632	12.4493903802544	12.1301370965306	13.1462190767145
TBCA	12.912379683787	12.9753641048092	11.9106989547597	13.0940574333516	12.9683552725982	12.4430919497697	13.1450550753124	12.5460445432143	12.169044297663	12.0443946521719	12.3340856688336	12.2513903820266
ARHGAP1	13.5687539440457	13.6313583886182	12.0480248988748	13.8705565748624	12.6533627502471	12.7483565295738	12.4984302047995	12.1930046051552	11.189076810713	11.4735010063171	11.5616131579458	12.0196918726064
NUP210	13.627893251569	13.2403546630453	11.2637764086776	13.2856090829448	13.4002054378434	12.2190571911244	13.1627738163192	12.536333159135	12.1787265249012	11.993980099702	11.8259602419437	11.7739208033584
YY1AP1	13.4351775902169	13.4421554922367	14.5483877278392	12.4178223759018	11.8035881623415	13.2916874842021	13.0297527752848	12.783123017931	11.9595551785904	12.0599798530635	12.1443806744875	12.5340403756303
RBM5	12.716842535051	13.1998830883577	12.8684293316895	12.8692505722626	11.8777572514741	13.3883953161195	12.6788059225815	13.0700444267676	11.5364906030696	12.2304948121759	12.4996337841126	12.7344020353785
UBE2E3	13.4730431194145	12.8142724460182	12.2872684182194	12.9519766977807	13.0473266321482	13.0014414780391	13.3286006872029	13.1738408199746	12.392321658274	12.4584119125933	12.2422530823463	12.5726109781664
OGFRL1	11.4917450835195	12.103844057489	13.4194992513534	13.794609343882	12.8705365116379	12.9075212776448	13.2824274734001	13.9765394524032	12.5498381181353	12.1768469005487	12.8549457920551	13.1254760558715
PSMB6	13.0976778629471	13.3491311702231	12.9946450469504	13.0166422547094	12.5536934912175	12.8263667592296	13.4753778056161	13.2530545870057	12.0643729718648	11.9190460843028	12.5049231500786	12.3386121620187
PSMA2	12.7857069939189	12.8398480182275	12.362843559114	13.0599	12.5142532480531	13.0790169919624	13.5074088807414	13.0978211994371	12.1554491270167	12.2557928549233	12.3444940082492	12.5514622073102
PLEKHO2	12.8690757427023	13.3550269244259	15.5957310136045	13.3091529447202	11.1153135818997	12.1593001513658	11.7547281728287	12.0678131996378	10.6562457800995	10.9915209142758	11.1524488153096	12.0910282379582
YWHAQ	12.7688627731135	12.9110222612907	12.1007669634501	12.1035707534926	12.0016643833759	13.4828668932951	12.9267599484642	12.8628188655733	11.4165303135232	11.7872796804926	11.8107681126507	12.5513482748718
MRPS24|URGCP-MRPS24	13.0615011601603	13.1362592315202	12.0325310983759	12.6410644441451	12.4740573674881	13.2950271273313	13.7539215416533	13.2352234157187	12.2689005119602	12.4425870154486	12.4494743880752	12.9552565077426
SNW1	12.7242338068915	12.6662033159617	13.1401216989144	12.5417462681014	12.9256395285562	13.0013263013552	13.4602986990049	13.3017002313049	12.7579174213491	12.8822987115461	12.6629709940068	12.8521069639638
DHX15	12.1534160611097	12.6388879796186	12.3988513380857	12.3809845818086	11.7634355592915	13.9581601719528	13.8458638898617	13.404628155146	12.4062232960075	12.7076395105628	12.9023592602055	13.0581111575024
CHCHD10	12.8530576772702	13.0612390048186	12.3378490419639	13.026024927222	12.8189525842165	12.6851581857807	13.4696198408994	13.1430305513795	11.8871613833945	12.1432434089824	12.2007794165896	12.7576971642381
AVPR2	12.7870147034158	12.9803088222655	13.8021598810986	13.4014217881952	12.2450621873725	13.0145117090951	12.8046028303705	13.2461868584609	11.7740072616183	11.8634445458254	12.358019838907	12.2653495163541
TCF7L1	10.9387037073577	11.107683958436	14.7515818268279	14.0241382863726	12.295859407615	12.4741317218263	12.7649766839254	13.8466610390622	12.0505031061579	12.4471261547911	12.6655496949367	13.0093431613496
YWHAB	12.8459228766554	13.2986498951799	11.9781095608806	13.136656964402	11.6667023407033	12.4305721463886	11.5326	11.8198067377812	10.0453794154098	10.5862830535372	11.5077023344891	11.5036506485783
SEPW1	13.3038514744537	13.1838972967827	12.2552074883269	12.5997712082705	12.1112351478676	12.9677667810505	13.0634061023579	13.1725875248427	11.9072681366912	12.0328265685614	12.6078744354632	12.2653495163541
DYNLL1	13.394490875657	12.5164249884338	10.9843507943897	13.5149605793519	13.0685171497241	11.7893480054502	11.6272589067671	11.3811637651026	11.5300214475917	10.9424085850563	10.6503208223141	11.4140106160566
ILF3	12.5552510302864	12.7723844039508	12.0960898330214	11.1789352488301	11.4888038158958	13.9504551281324	13.9754138907589	13.8283402633715	12.6195402963711	13.0357616751342	13.1335158657036	13.3370788143587
CMPK1	12.5062314931726	12.1218558012984	12.0484651431495	12.2538582239274	12.7535839310265	13.3952051846467	13.404639060322	13.3267053438707	11.9196940261329	12.2434	12.570754033101	12.6033793589786
STXBP2	13.1353329892206	13.2930607268685	13.9653900693903	14.1906880708291	11.9627071358097	12.4676435247604	11.9305070415515	12.3214492274861	11.3483062165323	11.4462026215845	11.9819181912026	12.4198618840549
ARHGEF18	13.4496177494203	13.3712026682797	12.4995251656359	13.0698359602395	12.5471665833079	12.8058718788588	12.9539021033095	12.6487657487594	12.0692146843134	11.8455706490854	12.6254939780433	12.0599713980002
ADAM8	12.981860108574	13.6394799807943	15.152072098829	13.0876380317043	10.9697322496628	12.5732309771547	10.6130483632491	11.6295281767398	10.1836881499014	10.4592954547934	10.8867472927262	11.367399932148
RAP2C	13.3993727408021	13.3783719190783	13.4726257604008	12.5388920883265	12.0283457884541	13.1308979172149	13.5754836793155	13.3346959939253	12.2872374833359	12.4805516710258	12.4103772527414	12.6257349759245
SLC22A31	12.079994166244	12.4533258605443	13.496699611695	14.4030638228822	12.4737044144664	12.8777148592236	12.4730901825666	13.3192366263237	12.0444637796275	12.2355496662173	12.4820237404429	12.533809732828
ARHGAP30	13.5008040033367	13.5024571070979	13.5817356794556	13.6351457959766	12.7484868350119	11.9464402598604	11.8252888325852	11.6127861516936	11.0015201882212	11.0463988431826	11.2678195684185	11.5239979310305
PHF11	12.7118938988729	12.8436763805079	13.5736529348324	13.1616475193383	12.1825102426648	13.6841947944538	13.2078492392266	12.8666128946913	11.7038948562709	11.7419618723148	12.5127414544708	12.0752664572965
MLH3	13.0696908252206	10.9424588058258	11.7201992659396	12.099018548049	13.2924613813631	12.898149036323	12.5658690565827	12.7934876498778	12.3779846152121	12.378954962225	11.4123212605717	12.706740279281
TPP1	12.8172815196198	12.9722086195573	12.8017072993232	13.1253971307716	12.1229864894416	12.9812610520091	12.7185677013226	12.9085383982302	11.6327183939074	11.5079998668061	12.2948343751325	12.4752005611964
SLC22A13	12.4631975604667	12.2252555136232	13.1857605769366	13.5624414263166	13.0561938704647	13.2047804051308	13.1224532086815	13.6472030742686	12.5853701228257	12.2333277120655	12.3576655158957	12.4797576257639
SRP9	12.251785494454	12.3254515922458	11.8914418256154	12.671736685904	12.4050260958512	13.4134545096193	13.4380314790165	13.102216271152	11.7979875745594	12.2645236161279	12.2439795084914	12.7677349096707
ZFAND6|ATP8B5P	12.7132702235736	12.7549154163309	13.5659859665303	12.4626293353581	12.2781820522166	13.6213567737802	13.3310772234133	13.0205162382341	11.8508533303058	12.2706432616806	12.2842466094304	12.7042829218737
LSM14A	12.8304054409225	12.8647350135596	13.3411708415984	12.2259460267304	11.7732204838078	13.4106385531551	13.4723147364301	13.4243024931702	12.1303651539682	12.4218048959896	12.9081778637244	12.8433859423824
AKIRIN2	12.7834811637856	12.9717572719894	14.0108274978529	13.1326536301507	11.660203005058	13.0918386837126	12.7949473749494	12.6116367590037	11.1530446401261	11.4976019067998	12.1529823263892	12.073363419209
TLE3	13.169625957189	13.6482623890863	14.8305	12.4877464364485	10.9974963181582	12.7502083051024	12.6663075064609	13.0209805705171	11.8356332379094	12.0171784655393	12.0444544827923	12.7767290451122
TYMP	12.6259383206135	12.6283309333775	11.8005403774129	14.7647621956882	12.0014195473025	11.5737626888781	12.0871761868617	12.3032401475986	11.2546304632918	11.2764826971414	11.5452148089406	12.0420819509174
TOMM20	12.5856271423664	12.9249618274306	13.0514259697982	12.2685268220977	11.7164763192708	13.718089679082	13.6559819095829	13.5035817372135	12.1367658575767	12.3884263950265	12.7681605242486	12.751958124689
GBP5	12.2534893018222	12.5583615704092	13.9493313493568	11.6329705957122	12.0462587976725	12.7151032604249	12.8352824412343	12.3174225805937	11.0528141886287	11.1295587681879	11.7585824106518	11.1937558936195
PRF1	13.4960941957085	13.9620378164067	12.4047089102962	12.8810978851686	12.3093723541198	12.6465733098305	12.2242290800792	12.8803258599381	11.7000580782972	11.7946961585846	12.4357763136134	11.0962253646651
C2orf57	11.4467817365534	11.6661570894994	13.2083945622228	14.0751504585297	12.9787151126483	13.0410867785454	13.2019079063096	13.8440392426532	12.5010584425434	12.4747492794222	12.4434766086665	12.9390625431423
BRK1	12.8142062920121	13.0501655958434	13.4262056957862	13.0822281849472	12.0225663308537	12.9091797341282	12.5633435187638	12.9440660289502	11.3822230415803	11.3285057614169	12.0654350962638	12.5318477792076
IRAK4	13.1326609941599	13.2008462549124	13.2705661889408	13.5135929697938	12.3796298219571	12.6308754802281	12.3873209935715	12.4101445397459	11.6777963671082	12.0084636728312	11.9661998544248	11.9656571451663
MAP2K2|LOC407835	12.9647434027939	13.2711270588233	13.3420689299961	13.3712535358119	11.7914610461993	12.9783382327681	12.3747326071233	13.0194322148252	12.0906203739668	11.9041394763194	12.5400108453706	12.4859703737879
EIF5	13.4996080507101	13.9280670414652	13.8179328255887	12.0686082757771	11.0457838048255	13.5942361999844	13.0895797272954	13.2512087969116	11.7062876712922	12.0997749469877	12.3331848726936	12.5168724311042
USP4	13.4385099837067	13.4777164848442	13.3973774675912	13.3521566044797	12.5382490852148	12.8175627976261	12.5658690565827	12.3602533882026	11.5762785775453	11.7299766871903	11.9313856153137	12.1672044700096
MTRNR2L1	12.6742279607211	12.8036603228405	13.426290388261	13.3355150623062	12.7445424479924	12.4583597210405	13.5360275935848	13.5235994869569	12.5588697001654	12.3497888630879	12.5739604007818	12.6821844275609
SDF2L1	13.159362799466	13.0497379934331	12.9868566234723	12.2804367269742	12.4680453921773	12.9552157944155	14.1771438492867	13.4701935921619	12.8443195595883	12.7157651814773	12.6014544096427	12.9335656290567
ASB16	12.7022226856594	12.8794877766455	13.4821080319865	13.9960738260967	12.4564817088468	12.6792666536995	12.3607411620648	12.5735269242881	11.5567869615268	11.7299766871903	11.9514828486028	11.9299956730278
RRP7B	12.3652179674726	12.564361141359	12.9066899929508	12.4201964469375	12.6961977082622	13.7069738036097	13.4543286690803	13.4914587345943	12.7855629290046	12.7988405233562	12.8896711983501	13.1875645321383
PITX1	12.4181653976078	12.437723151823	13.1899567649223	13.4521866607828	12.718116287395	13.4439454943894	13.0062877562974	13.4396079306423	12.4333422003091	12.3694209371274	12.5721290633886	12.8953872892409
LYN	12.5320417220696	13.0480263154575	14.1548620101321	13.2313171089405	11.3769897903812	12.9655841291216	11.965358670131	12.1023032650052	10.6007367092624	11.1138330034983	11.6415026402921	11.8592313319435
PGD	12.9548870919228	13.2706684537762	13.9901221933716	13.4036384130556	11.5446482176135	12.6633401994511	11.8217711328443	12.5584657786076	10.5966151346883	10.9586397943106	11.6435387484191	12.220339741738
BTG2	13.072803615393	13.8556105103633	13.2292233821247	11.4155266945892	11.2334340184808	12.8822878145701	10.9800291029648	11.6456767352477	9.92727144085341	10.4228884087289	10.9762487616367	11.4620743907694
SEC61G	12.7182141491019	12.8804499206972	13.0673710537276	12.4562366430025	11.8136632817459	13.229672289768	13.1943106496808	13.0558395936072	11.5893010693408	12.028639246511	12.0078912816412	12.4317940773975
VPS51	13.3918288740126	13.4723022922993	13.2390922582251	12.7749417000692	12.2086211490628	13.2679952451126	13.0561392911705	13.0044828331472	12.359556596289	12.1075156910602	12.1460230432496	12.618575299158
POM121|POM121C	13.0887979094774	13.2927897338281	14.182451649577	12.2563133709518	11.8239454641327	13.3306202536609	13.1883131828736	13.030543462948	12.1441976293815	12.3123863085235	12.4112311317892	12.5086807391474
SNRNP200	12.7696567548259	12.9551856974818	13.6071359402717	12.7831942723457	12.3329142720443	13.2150966755017	13.1189223054029	12.9975789178809	12.0018550784305	12.2637320903483	12.3635007476568	12.4436283913433
HES1	12.0823394129661	12.7104297645153	13.2492771153748	13.793482812796	12.7559080478156	12.9998281672887	12.6909399264451	13.7014629718005	11.6447445113311	11.9889601151237	12.6446446494491	12.8332068154583
PTGS2	14.2685142068078	13.6784482179097	12.300080794942	11.4107592079031	13.2019246070195	9.39778671583915	7.78118876305177	9.19551965597434	8.0788893212483	8.32923374517257	8.32755394374118	8.03479807963113
SLC38A1	12.5566317863884	12.7320447470535	13.5312862955556	10.6792808618792	12.3633365711304	13.7522335050641	13.3069574064113	12.902503127263	12.3266523143309	12.4849731008972	12.4735462770953	12.2389936140066
SGK1	12.3553788520686	13.2284075254393	15.8620184826585	11.3146946084429	10.3192277475991	12.4777788988083	10.2983432964222	10.9043137071209	9.36683007918844	9.97018675981717	9.9824153900511	10.3552374681521
CYLD	11.8505869912994	12.0986857985149	13.4728	11.6773127121072	11.8200635218457	13.7798247396336	13.4136247427165	13.3746648007397	11.7314104703822	12.3482962981119	12.8729089398998	12.6214000208041
SLC10A7	11.8973500948231	11.8622617182697	13.1198420942713	13.1385435731337	13.2708875909474	13.197057357907	13.470443814881	14.103817527789	12.782618023835	12.4212726151004	12.7061941139769	12.6764498048394
TPST2	13.8962181314655	13.4206549959327	12.970107192705	13.2660467476405	13.4992457710241	12.0001085132843	12.1528568034532	11.1754801817209	11.4443182741415	10.9785547390112	10.894584352134	11.329102172156
SEPT6	12.7305003447283	12.7177156629383	12.1201632298768	12.5612380545996	13.0255794493543	12.8286405246094	13.0090743029727	12.3473520089789	11.9814529773274	12.4021583580752	12.3983695737164	12.145782465449
RNF41	13.2288515569688	12.9214603280902	13.4401969512628	13.3527303374741	12.527746854963	12.9544425937295	12.7247336810968	12.7246519962801	11.6372399441867	11.8023472618204	12.0931557545398	12.2962723285053
TUFM	13.1225449115633	13.258138157339	12.8550275356052	12.7646310141321	12.271293731832	13.3834545542244	13.0753710537856	12.9352247490861	11.8808201174166	12.105308284777	12.0527958295463	12.8006026067896
RAVER1	13.3224586850688	13.1468933940167	13.1357778070414	13.2114210896681	13.2583401191603	12.4159566731826	13.2572996315408	13.1648347197413	12.2437535290049	11.9054087385513	12.0796842916221	12.3166594165857
CTDNEP1	13.269741499078	13.4095334535777	13.7166580181082	13.1020417250805	12.3054110795871	13.1572927273207	12.7690008141877	12.7224648969382	11.790790145138	11.8743746909223	12.2219572951146	12.5630363158602
C21orf7	12.2053964873019	10.3224466832241	11.4392068410752	12.3888380892862	13.045902802694	13.0454501323889	13.3448678064849	12.9445556261019	12.7294965438725	12.4255253743574	11.8343882854261	13.2048344832765
APEX2	11.5758596502719	12.0036413331495	12.9532785721238	14.3529956317112	12.0199096551869	12.8437508903665	12.0657248952595	13.2111456453984	11.6699719338645	12.113678521026	12.3813891313075	12.3110176969971
CNPY1	11.8176948617062	11.7872953560824	13.3619524178206	13.2071972612584	13.2964583222479	13.3623999977493	13.4494740096854	13.7323664005955	12.945	12.6512579567024	12.8732808041904	13.0735051866285
MYL9	14.0920163474899	10.9341426551372	13.4369220225988	13.239199319742	12.5109890362911	13.8654005602347	10.4524797020226	11.7087140737094	11.8573273921345	10.5301224747766	11.0821286851026	11.8468447717954
FRAT2	13.1822039974426	13.1873030553809	13.0548263378831	14.9701207521465	12.6019684377822	10.803138460663	9.58253839710475	9.93130468983356	9.04861230017958	8.74676329067998	9.73862802673021	9.2508982936959
PIM1	12.8534322174794	12.9165439077422	14.1456326902645	12.5173891255204	12.1721061456652	12.9995975469548	12.5950115574567	12.981684723701	11.9295582508883	11.6616161889153	11.5194707058827	11.9023909376885
LOC100506745	12.191045555761	12.4554258139412	12.5548011458029	12.4307411153913	11.9020937219402	13.5251385213416	13.6152446703901	12.3970875162853	12.697139979907	12.0911003383595	12.8505457520911	12.8216333619687
EIF3A	13.0072164194685	12.901219355382	12.0627004357458	12.9045045781474	12.6899821257028	13.3231292652826	13.5616312640605	12.9043499179371	12.2040068025802	12.2454060979954	12.2977924656848	12.5212999475611
FAM86B3P	12.4141087166644	12.6770416415989	13.6646241594062	13.9206888002831	12.4281625971139	12.8307162647253	13.3323138991287	13.2867825262949	11.962761043794	11.9442120212758	12.4217774590765	12.2805501563199
WDFY1	12.2941563566572	12.296549157151	12.4585384551324	12.4176395932957	12.0417418280815	12.9946302728452	14.1227690743919	13.3360027433834	12.7000243418648	12.8300542728979	12.9604491682725	12.8852082099461
TGOLN2	12.3791584552098	13.0920906108247	12.8309187553628	12.5134603775722	11.8206187250654	13.3925729176545	12.751851003947	13.2074786705783	11.134685365331	11.7504621665644	12.5055629694945	12.6379113145775
HNRNPH1	11.9344072681014	13.8530395882569	12.2255358947032	10.8968339091006	10.9280887301495	14.3157644457873	12.1489317978974	12.5963472517747	11.2288984795443	11.8325522534834	12.2992692397416	12.3276110204042
PRR24	12.9108210152008	12.9731108913012	13.3787674751894	14.1933597837258	12.3408705102979	12.4914562853488	12.4415021484435	12.7554864358575	11.6129595845774	11.3954358028584	11.8024609059209	11.9217343157402
TUBB	13.036759414484	12.6902703024351	12.9502190385504	13.0277025565256	12.6048722195968	12.9659973165787	12.9066441346307	12.5660160053831	11.6694814950849	11.7619988281173	11.9430052310489	12.3284091028256
HSPA6|HSPA7	13.2377732590429	12.9307788403163	12.0731232185813	14.9045910316008	13.0876721040387	10.4949446379178	9.49336809278127	9.50882426678865	8.78445532092386	8.95722572021931	9.59691538828428	9.0743933406711
NBPF15|NBPF14|NBPF11|NBPF8|NBPF12|LOC100288142|LOC101060226|LOC100996575|LOC101060238|NBPF24|NBPF16|LOC101060202|NBPF3|NBPF22P	12.7648862970301	13.1576481808285	13.546560456854	12.9401906842044	11.5689741794362	13.012455844364	11.6536169384851	12.3582948991258	10.4351960332055	10.9522674639039	11.6605869985352	12.0771669884206
GLTPD1	12.8641278971816	12.9298496929102	14.1318847904035	13.5637635257763	12.1771008054687	12.3935765241439	12.2302562937608	12.3735253089192	11.5893010693408	11.655292799727	11.6726014509598	11.7284901015725
RBM17	12.5910275627279	12.8809307522071	12.1928536564111	12.333137830686	11.8464751567977	13.3684852765432	13.3818870980754	13.4832261617287	12.0825383168571	12.3873367054487	12.8895486545141	12.5943392050726
LAMTOR1	13.0738754359755	12.9990342838726	12.3807849873543	13.4102679288896	12.3912630103568	12.8761454404468	12.5429784591327	12.463501341309	12.1790711197068	11.6564993934455	12.1320029489456	12.149701109372
SH2B3	12.1864942950395	12.5077337182408	12.9214262073148	12.9071109681021	11.5375736903423	13.5284593523682	13.4547829575413	13.3896643399272	11.8281822814959	12.253801200733	12.3684334120361	13.2527774507105
STRN4	13.0293749396426	13.1626990952602	14.0074349239902	13.1908190777656	12.0009297511728	12.9154278648658	12.9336206701909	12.5256836609897	11.778562463013	11.8301482970773	12.1373796732343	12.4827478633452
SCGB3A2	11.2847872465572	11.7880646335663	13.5570409369545	13.6032752596125	12.7345603903013	13.1587393043759	12.7828166207711	13.7600279572929	11.9072681366912	11.9087036040064	12.953666269658	13.0023588302159
ATHL1	13.9433670241748	13.5047208117744	13.523231849123	12.8098	12.7934422997957	12.8207645242889	12.154535685562	12.3405478168579	11.6402464571078	11.9122435250634	12.086542658713	11.9303461730171
EPB41L4A-AS1	12.2647968849698	12.4977362989913	13.6837376424076	10.7219468204166	11.387895137198	13.9927815690636	13.8504747314992	13.4474017181711	12.4003240705473	12.6163401260741	12.5641662945693	13.1118661416686
UBE2E1	12.6511471510528	12.7636763504538	12.7189	12.7652057672605	12.4779341615745	13.0463435504626	13.3453578967672	12.9344855240968	11.6556810744649	12.1660855140431	11.9823779125903	12.5002061910422
CHD2	11.2947503185674	11.979822808454	14.8548639493226	11.7033381869917	10.951597570994	14.0707568474549	12.7816099879286	12.9166295349151	11.9089311184039	12.3611191765864	12.7571877657684	12.9757773560628
GPCPD1	12.8784301542656	13.2154077643765	14.7234952601192	12.9203308027819	11.7460044739129	12.8259115756092	12.5901951712025	12.5870742553953	11.5450712660022	11.4776027758055	12.1330384916814	12.1454805899232
TMEM183A|TMEM183B	13.2074265298521	13.1574497450395	13.3222717027971	12.6588037745007	12.2463025042396	13.1365722694926	13.5090137905655	13.0898024009921	12.4791175392365	12.4302947919169	12.4758335760065	12.5769828820855
GOLGA8B|GOLGA8A	12.3468915850144	12.4365788263051	12.1104976929769	10.9207627712039	11.3830167249656	13.7586529501447	13.2182326537574	13.1709147692397	11.7912410378475	12.4046737354932	12.5379795157812	12.5443813205936
TGFBI	12.5572450317651	13.077691367339	10.6439048222049	13.7172653259911	11.9350280714382	12.1936774930495	12.4384427935285	12.7016652221031	11.5386405583067	11.6401246089918	11.5535919734182	12.8714017266053
NBPF15|NBPF14|NBPF11|NBPF8|LOC100288142|LOC101060202|NBPF24|NBPF16|LOC101060684|NBPF12|LOC101060362|LOC101060226|LOC100996575|LOC101060238	11.8600616597629	12.8250569678959	13.5024951699234	12.6110053959726	11.0218420768583	13.7042167807123	11.3856337309908	12.5224078322319	10.3714926482725	11.3398160379259	11.5692840046892	12.574294047872
TRAPPC2L	12.3567885551215	12.295828140228	11.6087935795195	12.008224211319	13.5485079123577	12.8393761330036	14.1056101191844	13.6484056878962	12.7110279478531	12.4591035454789	12.8484037379912	12.4032922931365
DNAJC25-GNG10|GNG10	13.1188109126011	13.5293899143284	13.1616471088839	13.9669530243917	12.2934615758027	12.2299113519444	11.7246547375193	11.7348012724755	11.0972506888815	11.1553933480984	11.4916450612372	11.521441078876
GIMAP5|GIMAP1-GIMAP5	12.0113878902933	11.858604489796	12.3127803873062	12.6754106088175	12.8228375128956	13.3733884861037	13.0587316691916	12.429161332235	12.4844250212799	11.6179983808435	12.6569360398292	12.030194733866
GLT25D1	13.5002460150692	13.5450991649443	11.7960904929549	13.7409069949225	12.7221334889599	12.6512054991235	12.7019525560446	12.4500012065212	11.4235276420519	11.4300661153431	11.7730031051061	12.0804869050835
DCTN2	13.3626566202934	12.9897019337491	12.9526907039334	13.427254492122	12.8926196900969	12.6615920838735	12.9812790027052	12.4690704192466	11.9221664125164	11.7853506499393	11.7751272974665	12.1587037159235
C9orf78	11.9447555688785	12.292217640539	12.3382091725561	12.0231984559186	11.4992455646966	13.4804725750941	13.8428589206487	13.4929657452121	11.9631612763753	12.3226835485996	12.7889392941998	12.747191248561
APOBR	12.9997915616508	13.371886991317	13.7902324176536	13.8175807346315	12.011423901136	12.192769970443	12.1321776931525	12.1822507158443	11.2844026231061	11.3413173972819	11.667750505144	11.6736485800293
MYEOV2	13.1344086278451	12.8995592680503	11.5118795228422	13.1385435731337	12.8316782616893	12.7530841286078	13.3854658300894	12.8114932248647	12.1533461444987	12.1605682685076	12.0899596546578	12.4236013066588
GARS	13.0069919844019	12.9059519633567	13.8280326349818	11.9977468108365	12.2071356936925	13.4203627691682	13.3397117727751	13.1656048781701	12.0493726565344	12.3690529825247	12.4691247911011	12.3907390053521
SS18L2	13.5070070219092	13.4758079129876	12.9682470104587	12.6246887038987	12.5560292997891	12.8680199952566	13.1210228027543	12.3776403159961	11.8064881454347	11.9652997571327	11.9304329304251	12.0500064556899
CAPZA2	12.806618374916	12.817290198563	12.3215494124154	13.3508170057316	12.495078067303	12.4694764853941	12.7524670206284	12.3127527166894	11.270887156273	11.213933591622	11.6382972248696	11.5984488252508
CLC	11.4041264420304	12.948434585107	9.86699068399469	12.7947817362775	12.1175746850514	10.6950612224356	9.68315481853671	10.1893694378626	10.8905911548355	10.6603246797581	10.3772285162362	10.8100272279392
UBXN4	12.5304810780326	12.5201338496374	13.5821918422388	12.3407	12.3962999031197	13.3986199675184	13.407536216793	13.2056416821072	11.6387439838272	12.3512798855008	12.3443151888513	12.5902414905561
TXNL1	12.9104610831669	12.9306627297491	13.2310668258393	12.3183317362821	12.1881146236403	13.0319820409425	13.3160704952884	13.0383624732674	11.941794437707	12.328940315333	12.2529618764138	12.4570702632026
TSC22D1	11.6893048126531	11.5323775899052	12.7142368406452	13.5745428831226	12.4992457019991	13.0550255044334	12.5089679536597	13.3366867599114	11.569460139897	12.1466821325305	12.1920614662463	12.6253020660223
UQCRQ	13.026720532944	13.2567494521231	12.6320281856883	12.8422670047414	11.9861579984284	12.8738824740893	12.9169019728107	12.5413049223274	11.3310440290535	11.4680137765463	11.6382972248696	12.2041978747317
TRPC4AP	12.7595672221316	12.9380750393774	14.025213508023	12.9695394720079	11.8311271898476	13.2513359103122	12.8543463153967	12.9147151181927	11.7067657582531	12.0413958621178	12.5010782625495	12.2338913457645
HN1	14.1067009402202	13.9670849522955	11.3767704836016	13.9244244432638	12.6124268770433	10.9933	11.7133085175039	10.9692726813765	10.028650398193	10.253823169286	10.348273188805	10.8535528559335
ID2	12.4931511306122	12.6527510834308	12.2733999680139	11.8229976848396	11.9569106410003	12.8889022976396	12.9271965212214	13.2567390978774	11.534876031685	12.0772016580067	12.357842688279	12.744702248631
PPP1CC	12.2760165298277	12.6380348750165	11.5274383885266	12.2577436129162	12.3333034009699	13.2033292212074	13.302757752759	13.0668249076776	11.754716786091	12.4348727098514	12.3335452586455	12.6290856298154
ARID3A	12.9617356734706	12.7052805039588	13.3756130968125	13.8595642776641	12.4263398612228	12.6710358056629	12.461532796088	13.0275426065418	11.4961273798038	11.4796492956237	11.5436581296456	12.0604518311496
CCM2	13.7176	13.7993637240777	12.9223872779711	13.4577975125365	12.4952519594871	12.8542475170945	11.6221447480855	11.4093395492894	10.4036959215913	10.755736415309	11.057033096867	10.862396508884
NKIRAS2	12.5656508287434	12.5342634736264	13.0912835548473	13.3995719952111	12.2392599006791	12.9395522790423	12.4479057539028	13.0808482852923	11.3550316792216	11.6972276159242	11.7679455770466	11.7688341439599
GZMH	13.6922608090049	13.5731154838563	11.4658190395037	12.022237051767	12.2820171309499	12.4008423797787	13.0130898368464	12.4694106856953	11.9238123192276	12.1167500916071	12.8005867782737	11.2644063986832
MFSD1	13.0900698254498	12.9733363710052	12.3211850985233	13.3748356593676	12.7251019985165	12.3030325170881	11.8293	11.8958679020666	11.134685365331	10.6794437633658	11.018103389789	11.2243776173532
KCTD12	12.4302674448921	12.4741891015959	9.57594501761188	14.0189665660786	12.8944667623127	11.3775915148224	11.6162003522455	11.554107984312	9.99928989814683	10.0929085644274	10.5996820957111	11.216639222118
TBCB	13.4853398801854	13.3228289569561	11.8002789994799	13.3195600255093	12.7769444230453	12.2712880712633	12.9448754048032	12.3842721946134	11.8330078804612	11.9167821267286	11.8076585130126	12.1138898488611
SDHA|SDHAP3|SDHAP1	12.4285926634353	12.5142570746801	12.9495120699202	12.403495320039	12.1382106027461	13.5323306620747	13.1227391197914	12.9825590992964	11.8153823326822	12.1382858398181	12.3708934340637	12.4756809307033
ITGA5	12.8833292738974	13.0889725428274	13.5060254729155	13.3319308326603	12.2450621873725	12.4830674781024	13.194673332333	13.0229136813847	12.5934072388659	11.6753713297931	12.3477089736476	12.3153181498362
OGFR	13.129159362859	13.1011982581458	13.5151321828089	13.3614041010272	12.0938860720248	12.5274144483329	12.7605738840374	12.9120473487335	11.4000700088668	11.2982907750864	12.0580393075651	12.180820188788
CBX3	12.3808915828141	12.5627137449658	12.4221402680417	12.5536060023144	12.3589477060588	13.3491566755616	13.0494373841954	12.9557707452485	11.6522102438189	12.0411649278591	11.8591306703532	12.469905914104
MFSD10	13.7062904387973	13.339192733982	13.1645945867783	12.9797278197867	12.170364811426	12.9616825326653	12.7444382147336	12.5475493446833	11.8073800357623	11.9930252576932	12.1390300267606	12.3497921142248
POLE	11.0951134974466	12.2418218039431	12.8562853271057	14.3213955759318	12.9147600092395	12.6189889899427	12.9812790027052	13.6090041933487	13.0357109820165	11.424410841649	12.728426215316	12.5244375781763
PTOV1	13.308320925227	13.3216782827304	13.8331519682587	13.0580401532256	12.3368008454397	12.4480019993133	12.5700684862436	12.5437843935839	11.6729110713951	11.5407131681896	11.985133169531	11.6987604485981
GRHL3	11.4434684164481	11.4932884372179	12.8357728496954	12.597675193055	12.9944242988492	13.3427164383888	13.3170702623744	13.8378592011172	12.9959719278589	12.4944504057349	12.9312204061575	13.191152105089
SPON2	13.5048628399807	14.2256338698828	12.0012626212303	12.5165359594729	12.3818887396407	11.6515624664212	13.0565384217661	13.557175662762	12.6367029990302	11.956019907361	12.3170558678346	11.4217593819805
USP9X	12.2515960580258	12.2674	13.3132323256077	12.7982960665383	12.203521779142	13.316108581848	13.0788135675107	12.902839083222	11.9254563507073	12.1281018689804	12.2316575725624	12.3929024031467
BLOC1S1|BLOC1S1-RDH5	13.1198491043632	13.099340001976	13.1603238683321	13.4299756268492	12.1501869268125	12.2809988260703	12.4211894711966	12.4410075304799	11.7435767320084	11.4878064671633	12.0029152084234	11.9375127194358
HBG1|HBG2	9.02266826737299	6.06673438174676	13.819803727131	11.544335254019	11.3667618954429	14.3435829329112	11.019052732138	9.83177793012261	9.51831506674935	13.1190819347355	10.5434673807147	12.2130118155293
REC8	12.7598336420367	12.8474946104604	14.6087015567756	12.4615658518997	11.1080547216597	13.3781863882112	13.2562575586993	12.8164947761164	11.8659145291485	12.0597518743888	12.5296682132093	12.0388349080289
TRMT112	13.134100375674	13.4439463786174	13.2566307227334	12.6683606847016	12.1924109198117	12.6542853828328	12.0338502330876	12.3170445054531	10.8496158527427	11.1494065270759	11.2670650968085	11.8154998335652
CLCN7	13.3160413652666	13.0935434061452	14.2035568176684	13.3586455916221	12.1232115415509	12.5131	12.3882726003949	12.1342722420464	11.1146490086897	11.2670345101124	11.4353377835043	12.0760586495236
BAG6	13.4051751921223	13.4211509759054	13.4765570213127	13.0153141340814	12.3453146293719	12.2460409969787	12.4109248675855	12.3630640665869	11.1339745524591	11.4769199567288	11.5560647835568	12.1715102662838
EML4	12.4896214937203	12.4138319303474	14.0439352316215	12.3153914399814	11.8530032005098	13.5628547109241	13.2191242865665	12.5458294432861	11.5456058669919	11.6495476573594	12.4930350176102	11.9904084219516
SNRPB2	12.5109875149736	12.6323345820806	12.0839008026355	12.2019477430557	12.1202831248245	13.3021508993456	13.5358844707261	13.2541740943764	12.1571992739065	12.4924247892113	12.3956108717845	12.7566104786533
RBMS1	13.7120157741107	13.5088487711858	11.8559164791287	13.3335787471298	12.8033074022281	12.5940018648963	12.3064013457214	11.8948549145001	11.1304152240623	11.3113723344231	11.3903179852431	11.3912754744617
MST4	12.7202691281004	12.7525526377487	12.7528	12.7775078987058	12.5139099945592	13.3645954474972	13.4438403696723	12.8244968327892	11.9826378969037	12.0893144664337	12.205512550719	12.4045542492203
GRB2	12.654589917933	13.1088127082438	13.9587304042811	13.1572751992952	11.8393696152587	12.8273416688599	12.3985416427769	12.7758048730412	11.3329034594905	11.749331683258	12.1924588819235	12.4568269800017
MOCS1	12.4907454970022	12.3565548950282	13.1527683713772	12.1751667200444	12.6586513421537	13.5288589377289	13.4407859754203	13.3186072380982	12.2161469666676	12.4157608477002	12.4361119650232	12.760656699077
CHMP1A	13.5789062176628	13.4937596186418	14.0914402286334	13.3390904079679	12.3062042052178	12.3468407452054	12.4407379179085	12.3245872443269	11.775375332774	11.3654980196591	11.4916450612372	11.6536216990631
IRAK1	13.2385381464702	13.2534110956112	14.3160201822561	12.5158530632809	11.7065978815991	12.7513045330009	12.785828795321	12.4767634898535	11.4636825251549	11.7213544688706	11.6631699603718	12.3444102466773
CSDA	12.5360915130462	12.6659243367964	13.3806043480035	13.1705695617805	12.1842369876234	12.7831401448713	12.7456763275571	12.6318414879721	11.4546023043633	11.8183376107564	12.2262334546222	12.5475834445332
NDUFS3	12.8419018550573	12.9892560267641	11.8541548135975	12.6547771202465	12.164253536667	13.035585843302	13.462634637118	13.3184813272148	12.2127849336461	12.2749705415696	12.7362158042526	12.4900181375012
IMP3	12.9988889767904	12.7234911955083	11.8549100763108	13.041172473433	13.0655925690928	12.6376346335086	12.8601881811942	12.3659911220092	11.3483062165323	11.721642707991	11.6791386413603	12.0272485240333
MORF4L1	12.3292273053354	12.4201314348026	12.5622193590451	12.2485243622854	11.5188790613738	13.2194	13.1824735496946	13.3838396737646	12.3979576095046	12.3557437286135	12.7102240346297	12.7620357401674
EIF6	13.2895292774411	13.1971827964444	12.4992031381129	13.0293782372735	12.4061362883877	12.4939143269052	13.1525421386963	12.9348141153813	12.0330714459919	11.5790780896974	12.2266215685829	12.238427585498
SF1	12.0541589037657	12.9526720258258	12.6575038422945	11.719739573536	9.99356219588858	14.1406078610763	12.2415337781976	13.061267463073	11.0994369877686	11.7068685945071	12.5570854835533	12.8481241014565
NUDC	12.9504588659821	12.8640055609899	12.5857651834311	12.4594365299912	12.5335156072554	12.8157955398575	13.3718993444163	12.7344059301678	12.5434286702198	12.2037138810661	12.760273921324	12.3034609206545
HNRNPAB	13.6292791448658	13.4427255606656	11.2796135088035	13.2882107965176	13.1087370635205	12.0517404846033	12.1556538555576	11.7314005549941	10.5883364912577	10.8260532695276	10.765914303905	11.1320152658449
NDUFA13	13.2927549845368	13.2629420123644	12.3024820341654	13.1037469109227	12.3493603821637	12.5445887749966	12.6710071101561	12.6033922874404	11.7248166606786	11.7178911009333	11.9970121814309	12.1735843358637
VDAC3	13.0926102984361	12.9376128840488	12.8918017030046	13.093256568466	12.329407381114	12.5834999373629	12.3917564657701	12.2793747191456	11.1016199784922	11.1698301705567	11.4030795196663	11.3611738203474
CHP1|LOC729603	12.4049392618004	12.8818919347291	13.1313168973256	12.9189109478862	11.6924107857431	12.6589659325767	12.6521161363118	12.9788990886235	11.3427801489683	11.499956392494	12.0976184325485	12.4878766186386
MICB	12.4479016154845	12.3330269679461	13.4177964604016	12.9451449336169	12.5556958442321	13.0809802237625	13.1112582487768	13.0410357312965	12.0862175926575	12.0881971727426	12.2836872004433	12.4631390468886
TMEM154	13.0504361872885	13.3077087174713	13.5259216640628	14.0944891679552	12.6777765100526	10.7266161136841	10.0659457468715	9.9919313347826	9.79862528418675	9.13047527640793	9.96855998229446	9.81732777229413
ICAM2	13.6447252948445	13.2294462393432	12.7294173370396	13.4992406265344	13.1250107829015	12.3170742578636	12.0391	11.2795285975484	11.4258525631449	10.862060254785	10.9586002576115	11.0116339325549
NBPF8|LOC101060684|LOC101060362|LOC100996575|NBPF15|NBPF14|NBPF11|LOC100288142|LOC101060202|NBPF24|NBPF16|NBPF12|LOC101060238	11.430807941948	12.6090152750896	13.4119918922623	12.2540629792921	10.6157892376574	13.5238160641146	11.1365961791998	12.5650611185715	10.2429037968632	11.0836528159376	11.8231399172537	12.4268343180745
RPS6KA1	13.1501	13.3601229095384	13.9275979389105	13.8901867804388	12.0131250497561	11.5765484536572	11.0854896333245	11.5478919464167	10.4626301616907	10.1844181840418	11.0270437452474	11.1304907702969
PCBP3	12.018976071202	12.3358355893857	13.3868845054714	13.7355644738066	12.1670941337743	12.5711373457726	12.9390425601419	13.3832378532194	11.8347586493563	11.8460995251372	11.9613108478543	12.2667380298441
CANT1	13.7955360889677	13.6911157972025	13.7985003843658	13.6359316444779	12.617228396383	11.7856076357654	12.1468715726714	11.8322069004842	11.4246905711907	10.9043181061677	11.4119800275661	11.025151941435
POLD2	11.3706759812492	11.7036055539184	13.1314207962286	13.2672645159871	13.0295470288093	13.0484632036886	13.0114437902145	13.8968983784821	12.5234850253801	12.3690529825247	12.3339055545954	12.9097672775644
URI1	13.1659114802445	13.0879316875236	11.6180176865289	12.3826710790092	12.5324992668699	12.7508250357989	13.2020883066724	12.4822817052895	11.4983382883684	11.9203023051156	12.0128502502597	12.2562914576845
RALB	13.379658698696	13.2027706607828	13.2076063693057	14.2806704716505	12.3860209250318	11.1637183753419	11.6331580044498	11.3864587805417	10.6007367092624	10.2027045545723	11.238483777262	10.8733753829168
RNF38	12.0498076862361	12.3492761285027	12.7122932683498	12.1848652573316	11.5854022241632	14.0385392161824	13.3025053840732	13.1414655120953	11.994825415475	12.2931210712983	12.4134488555525	12.670377588452
MS4A15	10.7184457192445	10.7704401438734	12.4631688067938	12.9123096641993	13.3040221382858	13.2757296489602	13.3118137370742	13.951628486268	12.667	12.3668432827895	12.6899609101863	13.0474064215484
RBPJ	11.9589803875533	12.3927450728482	14.732701483369	13.0115646571988	11.2030958482668	13.2162880065946	12.4173099513675	12.568665157764	11.381025356931	11.2986772248117	11.9740804295344	12.0064548510195
R3HDM2	12.8589143315808	13.0095164914823	11.6730138989393	12.9913193105318	12.3176557942282	12.6008595673616	13.3287659216627	12.9181260040997	12.0942791219279	12.0955553709827	12.1736609936422	12.5749667262658
ARL6IP4	12.6764876383535	12.7598908327363	12.1647028774037	12.5632224025914	11.8421066590286	13.1282105841244	12.9932122302055	13.034918132655	12.4310293269784	12.4184304615941	12.5208341237059	13.0458706688783
DDR2	12.8799016377191	12.3733972182312	12.5801430433803	12.344720456118	12.466804516356	13.3780089726327	13.6960487573697	12.9741910938704	11.9861868275842	11.821299359264	11.8969301931201	11.7883008208475
BCLAF1	12.7917126669618	12.8584008053257	12.145488644073	11.7695735252882	11.6966513375717	13.1578095285635	13.570950818553	13.3115392694105	12.1459614705594	12.3536995147499	12.863206674504	12.674777261694
SP110	13.4765324528352	13.3196402229795	12.5020988033777	13.4432	13.2298857125105	11.406060220464	12.1658635664614	11.4965076258363	11.2375269034897	11.1252076670461	11.4639307192488	11.140219820153
PRX	11.9897444539367	11.3906646791896	11.3484471896738	11.7815545719875	13.8781575097339	12.957473546299	14.2381019849371	13.3977318917793	12.7703205847956	12.7766790919286	12.6471113194055	12.5607741893387
AP3S1	12.5191943259029	12.7417396287361	13.0442700391754	12.3972053893298	12.0966393079085	12.8512	13.3754229248689	13.2659094156018	11.8616273496228	12.4651412320222	12.3236016926038	12.7535435895705
ARPC5	12.0515497482386	12.637750394525	12.6567821749904	13.0329624410776	11.7164763192708	11.6371056899987	10.0675308029737	10.072982600314	8.67143415860607	9.45701447173675	9.3428326091118	10.3031415326342
DNM1	11.3845640817018	11.5870331603926	12.9807569429307	14.1437218480211	11.6777763887318	12.7294287488937	13.1193044414508	13.5443126465907	12.1645267940044	11.5873262468679	12.6260825097536	12.6810393252362
CCT4	12.6902514645942	12.7202704940185	12.0314180049554	12.4394098274604	12.3256963918707	12.7106720650609	13.0758633445745	12.8458832754305	11.6807196235169	11.8663152163563	12.260562638845	12.1090987441735
TMEM167B	13.0277165079321	13.0414818485445	14.2535760502346	11.750542803965	11.3675220090695	13.1950949427618	13.0710316348561	12.7046550267964	11.9603573127299	12.0216332554402	12.0316292388207	12.5043319812217
DPYSL2	13.0486927791528	12.9541579064827	10.260385315435	13.5002767083334	12.7119946221238	11.0587	11.8790826149672	11.3561116576416	9.9613278971443	10.4114988585184	10.2600248865176	11.3991469837099
TPM4	12.6818402300947	12.3087516311236	13.2920105023182	12.113535330212	12.0911275718241	13.4382134919153	10.8053290191493	11.6795998417432	10.1418736512203	10.3591029936581	10.5779451439811	11.7088066648117
FNTA	12.8049410818161	12.5791036647492	12.4577100404657	13.0666920586872	12.4208577956123	13.0257668943682	12.7359907500962	12.5633619795392	11.6734003463268	11.7080328319833	12.3507387655758	12.0834840705995
SERPINB1	12.1901	12.3998083264206	13.4731177544102	13.3687974729625	11.3495526019339	12.7451273874561	12.3668690649713	12.8695378257207	11.1332633891985	11.5367872008671	12.1972193474699	12.5699139757916
LMAN2	13.8394315586298	13.5894618693146	12.1536962119929	13.2640148467955	12.5870349161543	12.0102175241335	12.2181765805539	12.1630259938381	11.2585488085972	11.5701424027834	11.2342438272661	11.8274047082195
GSK3A	13.3277	13.5001898461489	13.9265804634527	13.363872770597	12.2810088876484	12.0042525827826	12.1621592986774	11.9287386581205	11.1523428177055	10.9204789450247	11.5242144540195	11.4297146916043
CLCN1	12.3363904474761	12.4890890663146	13.3456557033386	13.0503974651615	13.1716710951811	12.7694083347914	12.7504948408687	12.916795886006	11.5159046287955	11.6528765802223	11.7334037896135	11.8963037688541
PTPRCAP	13.2043956012922	13.2712187623707	11.867938868398	11.9512759804421	12.4361553884329	12.8841629170779	12.1253450945466	12.3176745753721	11.7058094254161	11.7619988281173	12.1415020224644	11.9425603303386
YTHDF2	13.2025347832009	12.9519857181017	11.8872640632435	12.8792406992475	12.3251095723266	12.6663943139973	13.4198428053564	12.8492863352803	12.0038016991328	12.2458069742975	12.2732048837534	12.3249475531744
MPP1	12.9129787234965	12.5465901541544	13.8601733510996	13.0443724193404	12.3931305773095	12.6103303980327	11.4061364406912	11.5609361214686	10.6846763041776	10.8807650785049	10.5265450897016	11.6098723215984
CD48	11.3360741841479	11.9649324796143	12.2286472202086	11.8503406585624	11.2922610049727	13.5463319884995	12.5928117758623	13.0942954762551	11.1233	11.8813577352692	12.3944022788827	12.8008901544177
LPXN	13.2225830397695	13.2724103777634	12.5930262744125	12.7380881391069	12.5650035872551	12.580033652564	11.9708745624273	11.5375441138231	10.0649031832503	10.7658342419033	10.6363669559442	11.1414313513911
SLC25A28	12.9891503576947	12.8852510393214	13.4854446720584	12.4044180013478	12.2398826916008	13.0331655311483	13.2002832872842	12.5637869520626	12.0876866799658	12.089984427414	12.5254156727782	12.2991249244887
ANAPC16	13.2275037143107	12.9204082190777	13.0056827380653	12.6620478876865	12.6936237644143	12.2923401849472	13.1821077865594	12.6952791175386	11.3911741224722	11.7878303587764	11.659724982723	11.7542577878323
CDKN2D	12.8885773387503	12.440335349541	13.0343028628503	12.4784882253038	12.5272367382326	13.2937110085865	12.8091103768931	12.9170453764964	11.8744508561298	12.0704281152298	12.2634026323415	12.8191750087152
IRF3	13.4825176632792	13.3397175201609	12.8520043545721	12.6834908628512	12.2704811745084	12.6965850446761	12.3776105247766	12.4283447798618	11.2054082995897	11.3506656610708	11.7124963454238	11.7588040703227
COX7B	12.6407692804591	12.7248310352991	12.7786743693477	12.781490712279	12.230512479572	12.7949495219526	13.1128902708982	12.708119300444	11.8543097784333	11.8309500609077	11.8346429136327	12.2813746939763
KRTCAP2	13.0257238700754	13.1392768615499	12.2650902146606	12.5216474038354	12.1012163907542	12.858513896335	12.7988888827931	12.6258504272758	11.2901564293455	11.6714972832163	11.7891216257954	12.1303057083979
KCNH6	11.2423268865296	11.3380555439451	12.0594278129281	12.3344939384729	12.903797822304	13.1218676313935	14.0063718791573	14.134251913969	12.3632004264727	11.7022022261059	12.6458059606959	12.8140557732699
HCAR3|HCAR2	12.410719413735	12.5312035664689	15.8149246270747	12.6341589178384	10.2664110257598	10.5938941668049	8.27391509090127	11.3787505005316	9.41911248262548	8.92354429356291	9.46101863993369	8.90640378424549
POLR2A	13.0352195106603	13.0742266722559	14.2974348172825	12.8192041481108	11.7897607570126	13.266031179811	12.6861759479766	12.0942358656074	11.5820229609962	11.4697307788255	11.8205711924761	11.988894878233
TUBB1	12.0452247396827	10.3125002988677	10.0390144179446	11.4441644069995	12.2994486993827	12.9851101284416	10.6297746905926	11.2584182401731	10.6502929974944	10.8526161075204	10.0043109360535	11.697731380056
KDM2A	13.0241721356052	13.1853578921821	13.811657293963	11.5962949297186	10.902093514239	13.5722673790986	12.9019875471199	12.8913724601992	12.093548114459	12.3385568051622	12.497383938533	12.4711109503556
BCL7C	13.2404485925105	13.0469554845115	11.8639425268863	12.5804700005904	12.5818042004342	12.6255797747516	13.3669196463435	13.0721370019346	12.8497410787913	12.5072136839138	12.5364150059364	12.6746726634347
SNRPA	13.379745373631	12.948549274195	12.8301508242166	12.0942232228975	12.0314666880219	13.1146983159072	13.7165882944341	12.7203697818334	11.9155639429917	12.0305017792303	12.0094709847767	12.4020292322264
SUPT4H1	12.6113962775802	13.0578408458144	13.6212618524078	12.9203308027819	12.2487799435666	12.6271481356373	12.6965847967015	12.4868828234911	11.1586469642969	11.3228171978353	11.8510980888371	11.9551887514755
PLA2G6	12.1608998490384	12.3569005888005	13.1381582249112	13.8518736460867	12.3547371307234	12.7753478974997	12.8990973475935	13.3178516093253	11.9571460960646	11.9868033346848	12.2782683668479	12.3451990921035
SSU72	13.2289477833841	13.3080663145224	13.1150163443954	13.0715796164847	12.4810983534373	11.9104599455425	12.6230381622634	12.1793416893085	11.4071474338921	11.5813033905301	11.8966863252686	11.5559227876648
SAFB2	13.2938592836887	13.2828179837479	12.9083886995203	12.6845546908998	11.979709633668	13.0602871088223	12.895755291281	12.6809531000685	11.6088728303493	12.039316119407	12.1392361882316	12.269788063703
EXOC3	13.607757747091	13.456259408458	13.2464978291914	13.6667889514308	12.9164491196617	11.9415263468168	12.0777690255874	11.8090925316735	11.2188780556526	11.1828684212051	11.1000326537711	11.4200132949006
BCL6	12.256135676048	12.4938121624877	13.2118378519487	13.7800375787348	11.4160896181082	11.9895798416083	11.4956911757826	12.168345367737	9.86523864025987	10.3486901546479	10.7422223209502	11.0795728255386
KLHDC3	13.1748301908064	13.0224313323483	12.2456405944856	12.9731508971355	12.5416206578058	12.3210480251473	12.6294911565039	12.0485089907192	11.2895182497734	11.3292625448859	11.4838736239443	11.5710623018706
UBP1	12.8494321004005	12.6310489062187	12.1782435897751	12.5202861216468	12.5085790927208	12.8621335964592	13.2208168723738	12.8243194905895	11.5482759025411	12.0379279566768	12.0236110131792	12.1734362869923
PSMA6	12.6235979995573	12.626611676877	13.8337267590232	13.4355830924397	12.2475417556947	12.4810865321751	13.1732095219438	12.5571857712685	11.952315828547	11.7173130636084	12.1048145805186	11.8525890889823
WDR86	11.4540443654964	11.8394359968476	13.5702844877104	12.9639175770667	12.6835870547022	13.1402905087319	12.9854773498956	13.7925275325514	12.1732017827286	12.2512079327874	12.4577634867756	12.7982041445988
SF3B2	12.4931511306122	12.9026407686494	13.1241297427153	12.0861954227532	11.4444642683179	13.2854106533438	12.7394751101671	13.1621710044703	11.7181925756701	12.1633295288559	12.5117863842748	12.5607741893387
SMN2|SMN1	11.5637034782003	11.5366561675943	11.7443129435965	11.2484112299214	12.2392599006791	13.2346779271362	14.0685913292342	13.4905649474061	12.2328406052386	13.0168610164608	12.568000034652	13.0523259751015
RAB24	13.4429965400859	13.563487613798	14.1406345217243	13.6136846788405	11.4516508102147	11.3733257404813	11.343078702712	11.2062929485692	10.1987214770826	10.0622827486444	10.7519615685073	11.0317004102398
ZNF16	10.4211480965757	10.8653433046897	12.6056459052363	14.157907295229	12.4029885212527	13.0392928601083	12.8662341784852	13.4909560472802	12.4681616754329	12.0397785437695	12.474036718094	12.6156360686243
RHOC	13.687086903368	13.2824540727246	12.6131055139516	13.5498206855493	12.0415037004002	12.4948145605795	12.8358638507955	12.4293945478646	12.0580168847788	11.648031967648	11.7183037617578	11.9994564890763
LARP1	12.5955125219323	12.6114801399435	13.2845552113115	13.0602665439381	12.7173711320457	11.5821038974891	12.5263616082679	11.7442058653567	10.9023263047394	11.3106061060556	11.4737731580211	11.4244989701638
CNN2	12.1191463038747	12.7275069879091	13.105739253954	13.3962363786796	11.6263073647455	12.5501896847777	11.3677331519958	12.7042695935781	10.905661746821	11.3838265664956	11.7177516802669	12.6788506934006
CDC42EP3	12.6522956530275	13.2230130881082	15.2189150151896	13.0791112017821	11.2890550139038	11.8822167208069	11.3651576987872	11.3298674634628	10.2573355841258	10.5869160358505	11.0018697928051	11.6410425423287
SRRM1	12.5320417220696	12.6739929130314	12.4458949261407	11.8359134503777	11.9576680275869	13.3955557904522	13.4389502285177	13.0129109128147	11.9229896007755	12.3999988240184	12.3301179513417	12.6396271221194
CHST11	12.9318996171555	13.1647737546247	14.0198355505142	12.199185565994	11.8538171329423	12.6007075275617	13.2550408551057	12.8217455769385	11.6286873070915	11.9841628833176	12.0771039749883	11.997283431346
ZNF787	13.1183954266495	12.9531293827524	12.9600803940402	13.4159523681755	12.4491397327329	12.2270577176033	12.5564459600468	12.549267198391	12.4396835491471	12.3158268946337	12.2308839458406	12.4136078929817
RPN2	12.9926683722607	13.2161701034561	11.5877454256152	12.5675124825684	11.7648786877004	12.6659584074979	12.2762182387731	12.5584657786076	11.1739421156858	11.3083049750803	12.1840900809673	11.9532928979478
KRTAP5-9	11.8573253857538	12.0003258935698	13.031967246561	13.4707171640153	13.031706572781	12.9137153845758	12.9453065307446	13.3868450151504	12.3021840664668	12.2498096248328	12.2244856482584	12.6881036265879
IGLL1|IGLL5|GUSBP11|IGLL3P	12.0859564025224	12.8574238385939	11.5163420611981	12.0282353439403	13.547250514985	11.8207556039999	11.3492819266636	11.8656816479647	10.0240540701232	11.2858694110924	10.6589739455426	10.5729072966218
RBM4|RBM14-RBM4	13.7871957441671	13.8071008450742	13.3133239164722	12.7737997003932	11.8491987655545	12.4805082432714	12.424594840513	12.3337113819539	11.4591495585309	11.5832080630417	11.5854125527781	11.8427542395183
FASTK	13.5153153443004	13.4265131893016	12.401093807292	12.7733712175308	12.6121062067917	12.433904329917	12.813603884122	12.5865515280669	11.6650600255727	11.8333526828209	11.885423606134	11.8853178777914
ERMN	11.9424101917111	12.111649457644	13.907717549738	13.0487460349986	11.6183463287019	13.2452697456897	13.079206475178	13.0917928655983	12.8299080809556	12.2867066668493	12.3629712460411	12.5093847097035
KDM4B	13.5948235107304	13.5114130567489	14.5269066775366	13.2180486439888	12.5287665476321	11.3577557082327	10.5124800807451	10.7634232737445	9.61521332085972	10.0075444301335	9.94138956378835	10.0786918743838
ARL8A	12.8511835165053	12.9972613415008	14.0003982218526	12.1270134171646	10.7212413905762	13.2272121880005	12.9933164721569	12.9944298193512	11.5652481045614	12.0565563854598	12.602650998293	12.946186028174
IL1B	14.2098062435712	14.7297774603219	14.6039546853168	12.5658639612846	9.38976617714245	11.3273891931924	8.29842022420526	10.5319490415538	9.83056265699891	9.57784004609094	10.2394024693037	8.05036091462475
SNX6	12.8321800938748	13.0397603411637	12.7614572250433	12.3114616998772	11.6808374871787	13.155689466361	13.3835582783539	12.9983651195623	11.9031022760049	12.2954465292246	12.2592353927241	12.6462566681522
MDM4	12.6105102127295	13.0170824193047	13.622223324968	11.9730824359086	11.4676908244923	13.4921177740284	13.0109	12.891880266969	12.0818013342405	12.5467930947044	12.6726886628246	12.5767590038345
AIM1	12.6047374887095	12.6116250009986	13.113228822135	12.7260343117345	11.7354438269518	13.8215519960984	12.471444785147	12.7197025156753	10.6473073699953	11.510337457673	11.7113875157408	11.8901908075397
C19orf60	13.5471524439262	13.4847721460933	10.9058641580391	12.5529404333769	12.5575288963944	12.5341	13.0622140691543	12.7728671891627	11.8980873128556	12.0973335389011	11.8578785239955	12.2173268669322
DAD1	13.0766584486122	12.8721302524376	12.7741564206168	12.9649186276307	12.8063939825614	12.1564066715168	12.2131730325488	11.8989026041332	10.9039949897029	11.3129035725195	11.1686983540112	11.619033410407
ACAA1	13.2813869211252	13.0960305139657	12.5780100205126	14.0292915343384	12.5885026443103	11.7270531133344	12.3777702406293	11.8295586806313	11.2335509649747	11.1765743022076	11.1719264139001	11.595799738674
GMIP	13.7217585442978	13.8419691624592	13.7711543619788	13.3315428151109	12.1755825211117	12.1213305483121	11.5624123497585	11.3854974949803	10.7685863099888	10.2861436047975	11.1783609455996	10.7576615746896
MDH1	12.5020968871782	12.5765828099715	11.6441767241583	12.6045965759933	12.4972	12.7636479463947	12.9754862533815	12.8069231051865	11.2315588794545	11.8118544310671	12.0736563579712	11.7828765760859
PPM1F	13.4130733037098	13.5569579301519	13.4409516492662	13.8865594226717	12.1462058553219	12.2240010261311	12.1858863395014	11.7348012724755	11.1586469642969	11.1866317534941	11.1252303638143	12.0529066008723
RNF187	13.5445260232362	13.4076993064054	13.4459729069473	12.9745183866173	12.6000293309256	12.3320800621971	12.4433346520677	11.9207982805277	11.325451315092	11.3243363425186	11.8379489979995	11.4731828493763
POLR1D	12.446578228417	12.6530326215956	12.3713143844221	12.1542559926425	11.7778022909032	13.3333221564751	13.5858209634598	13.1108210472113	12.3275851635766	12.0715592498172	12.5833854541254	12.4133571685138
LSM4	13.0316935459615	13.0965481220713	12.9055969103378	13.0996510737607	12.3929439294744	12.3214171221451	12.9854773498956	12.6389174068673	11.8460871521457	11.7734439673507	11.9441856613059	12.1395813577135
UBE2D1	12.3265319308441	12.0309776477637	13.3442220636224	13.152450292699	11.2842326295751	12.5085752735338	12.4835171543268	12.9188736569082	10.7786263598689	11.648638434811	12.1241084373991	11.850738581347
MED25	13.0692609473095	13.3290091695174	12.8470781336342	13.5341408401207	12.4009480648374	12.038668015324	12.390173933597	12.6247306930232	11.9442292703204	11.4247649465588	12.0988909521544	11.7641227944276
C1D	13.0310314672852	12.8421956386862	12.6131055139516	12.4047869086523	12.3081851132198	12.6189889899427	13.2949983042353	12.9470825679252	12.1917636124077	12.2377682035076	12.3886909497917	12.2977672488171
CASC3	13.0076651852354	13.0749623031766	14.1329749269978	13.0833809163838	11.8415596654503	12.4397809436933	12.2535943658067	11.9041141182573	11.4799961570883	11.3636522928104	11.8558728262124	11.523765677263
MRPS6	13.1835948122376	12.8079651137838	13.1084864269206	12.9873837181029	13.2056487917133	12.2485662711766	11.8563387954569	11.2470847138365	10.342251299522	10.8196047472951	10.6806656887607	10.6201664723018
RAB2A	12.3808915828141	12.6569683961233	13.4474758821632	12.6169083142307	10.8622007755321	12.9451317183073	13.3502496728659	13.2534498064146	12.0647459889209	12.038853546777	12.6541976260644	12.5219977888431
C1orf162	12.3715078618201	13.0916752575738	11.5633082593374	13.4032692124508	11.7686240791317	11.7147424744265	11.8262254391732	11.8603291754124	9.87887898283376	10.3877200487828	10.8828127402068	11.5399338265498
NT5C3	12.4875	11.8546932000786	11.4769822469967	12.6812085864733	12.4719383534623	12.5398386004679	12.621420393741	11.7896041339801	12.0602634085508	11.2811836882877	11.2798377533954	12.1880199309399
PHC3	12.2538676527424	12.3284512642139	12.5417267749499	11.8800965720172	11.7	13.6385656805643	13.459468908697	13.0896548499823	11.9587525978562	12.3466153149329	12.4163438210263	12.5046850719137
FKBP11	12.7850526944962	12.9034692800681	13.0867898628267	11.2058587628781	11.2708873495265	13.1535662839511	12.9908125843127	13.7391553022098	12.4698526176858	12.3077860596598	12.8875865358114	12.1540593841853
POLE3	12.4467437183648	12.4245907417514	12.1514437817199	12.4580152342511	12.0989296644827	13.3305744144193	13.5569135488868	12.9586821465565	12.3635036638795	12.3572286125284	12.5244689589621	12.707967390149
HECTD3	12.8599088452878	12.9282222437391	13.4521418187377	13.1783583134314	12.1911233738508	12.548929404496	12.382235128135	12.2792453374066	11.5466744740728	11.3540162620577	11.7885959952827	11.6644075218847
PJA2	12.4860832001843	12.5002421560783	13.0610577878066	12.2221832627934	11.9644666739072	13.4248784043403	12.7209617205848	12.7078309285933	11.3977031309738	11.9385196432778	11.8903312479092	12.3338508809281
IGFLR1	13.2514795663542	13.3037692901768	12.9965856007775	13.3423680676627	12.2541331788469	12.058620057231	12.5226107381781	12.0706567783173	11.7115379360571	11.5426721527445	11.6001651253664	11.8998875663908
NAMPT	12.3864236410811	13.3319135418935	14.5435940130609	13.307378222963	11.5503499151253	11.5498639552876	11.0116613790984	11.2641825409777	9.67897685337453	9.68223268044464	10.257748009452	10.3816222172047
IKBKG	13.2579070019129	12.9800844297458	13.456543937362	13.1317624897609	12.2789902850047	12.7517154036782	11.8099831325202	11.7033238295928	11.1945412077137	11.3106061060556	11.0804119001075	11.3325537793244
ACRBP	13.5075624006167	11.4857212891548	12.2980458505796	12.7273622237109	12.6048722195968	12.7918231127982	12.4864824996973	11.902938969153	11.9147365055807	10.3366970064161	10.603870956557	12.1877267661227
LCK	13.4886388996358	13.3691477507761	12.9828314257984	11.0151146568861	12.1422137674654	13.2560740098148	12.0781622174588	11.9878884277818	10.5893739230214	11.1442551176576	11.4023925855303	11.1225373200547
AES	12.1045360378809	12.5188986218407	12.1782435897751	11.3618173016104	11.412411147444	13.7397916208269	12.3399061809035	12.7426874659268	11.8399982446439	11.9565098112722	12.3500264454344	12.6994584385703
ZNF467	13.0431215637116	13.1514839418833	13.2952601168049	13.6848243544454	12.319228214248	11.6956502546267	11.8448310000465	12.4321902008679	10.5841792860928	11.0782607386434	11.1767550008479	12.1155861010226
LGALS2	12.2313734277148	13.1532762745408	10.6937256689309	13.1487108722399	12.4466	11.7811868568278	12.8782506876289	12.8804964499149	10.8029778882748	9.32209893232554	12.2715130991168	12.3589345225526
SLC43A2	13.012815981431	13.4988591032163	14.779529863827	13.5079378386577	11.8546306064335	11.5861028999625	11.0490477138158	11.433026615116	10.1836881499014	9.8403004605819	10.145646094577	10.3923478145901
USP47	12.8594116741296	12.7036505959246	12.7859529926198	12.1859388590833	12.2056487075681	13.3321779009275	13.0754695252493	12.9116300638165	12.3513241720582	12.3366762639879	12.2944641870222	12.3979799902418
ACIN1	12.4541711783086	12.8350172168245	12.9506901585783	13.341693863794	11.5280866978575	12.8442646967375	12.4041978166265	13.2613970435674	11.3605111055666	11.5860603650136	12.2098376580272	12.2423851287757
SLC38A10	13.5127883494119	13.6687347773157	10.0963452936185	13.4023457953686	13.0213594529875	10.7114882859656	11.6432908834149	11.3097395136801	10.2376198729381	10.5042194595314	10.5821975022338	10.8631310389462
SLC25A3	11.7869140187539	12.6631315729128	12.9739362599806	11.7054360210434	10.6329606020276	13.9797751484502	12.4343023465882	13.2226293404908	11.0270123406153	11.7391172748561	12.4114018469699	12.802805675629
STRN	12.1020164970659	12.0139806463592	12.7896444152445	13.8475380615427	12.7486327164426	12.5285338167314	12.955	13.0929711054952	12.2104268398269	12.1425977346566	12.2133667632104	12.3048132515375
UCN3	11.9917873756663	12.3624204508751	13.1823547007837	13.7414912758469	12.1053233859291	12.8555223846387	12.1989616038412	13.2683232927634	11.4625506179193	11.1221540690831	11.9666646114666	12.1180498217239
TRA2A	12.5135176636167	12.6459776352473	12.4292571156083	11.4987524375325	11.3583741081631	13.0681712009837	13.4654177493123	13.4514	12.667	12.451998539867	12.9877243102621	12.5293048133526
PSTPIP2	13.0042960355007	12.6459776352473	13.1292373465513	13.0322463123594	12.3650503252035	11.8384005125717	12.931881353065	12.4381130366332	10.8659746716754	11.212293561331	11.2392533401722	11.7985126378658
DDIT3	13.5241251317964	13.8198209582695	15.0860610004391	10.3405515286613	9.45701647252062	12.8418224854783	12.6073232177071	12.0973214714994	10.7154111040953	11.0081573236734	11.7507780579286	11.4779860627533
SH3BGRL	12.5976007409342	12.4499271575395	11.5169784414231	12.8660390658222	12.4285268678989	12.4403757866403	12.3336624246925	12.3149002069945	11.1045255044659	11.2768750320959	11.2984180073114	11.8309758708784
IRS2	13.2982680440243	13.9982218502381	13.5478844191632	12.0465549239996	11.2549548305157	12.5675634057849	12.4595723810992	12.4854255204317	11.0647983889338	11.3277485813206	11.5424115761026	11.9596599815126
PHF1	12.9525581412251	13.1003726619602	14.5309686584758	10.4244506260691	10.6455496480207	13.7197706984519	12.6065057009123	12.6103002341969	11.5202629961823	11.8156398253346	12.0022353213844	12.2078166602252
TRAF3IP3	12.4392778214876	12.6831198386615	11.7074321334504	12.4099417309792	12.4318011744825	12.554120980034	12.1807693388965	12.1954749294772	10.6027930898743	11.3469336209705	11.5572996007823	11.5552411687699
MVD	10.3393686502133	10.4912960033012	12.9277814031059	12.8055785660987	11.9913453340111	12.9465082579049	12.8308560535235	13.8331075834979	12.7219482629041	12.0686164529968	12.9187847334516	12.8990628987178
KIAA0922	12.5348466339277	12.8652211103863	13.0891454469843	12.9169725274258	11.9774707749212	13.1737	13.0359394415684	12.572682575626	11.7323499879751	12.0112958639365	12.0667363090211	12.2132998875358
WARS	13.0228407476949	12.9653101791973	13.3915767471774	13.352347873244	11.5570290718817	12.3625283814359	12.6604113909567	12.1298303946047	10.8522111879858	11.2407283458215	11.2268907985234	11.9840070746951
PAPOLA	13.0168342507416	12.8463871328033	11.8496149129775	13.2772720753377	12.825882634762	12.1798008023605	12.3457964958591	11.7440183729826	10.3520644159173	11.0988218272025	11.1298025827744	11.5667851208546
ITGAL	12.0465356389698	12.3190786821089	11.5022702040281	12.9088025999777	11.7869224807746	12.815205972532	11.9708745624273	13.0898761709211	11.2996954043855	11.6266433939099	11.9883409990029	12.2733843556227
COX14	12.8756056087598	12.7843852438587	12.1679480504386	12.7904120439916	12.446983774485	12.727758951721	13.2550408551057	12.6506673652037	12.253275998704	12.0816997499034	12.2502921206116	12.2303374574319
EIF4A3	13.3547414124423	13.4735780484629	14.2875854672982	12.6084452832744	11.9146298926372	11.9465599023881	12.210126675956	11.9690818808521	10.948335021014	10.6107658555104	11.2579805330454	10.8149709471527
TXNDC12	13.0457459923966	13.2037319021169	12.6495455757072	13.2915062308222	12.4325277899371	12.2826109492422	12.5386993118016	11.9983014101535	10.9976181431678	11.2733401717626	11.3341554918798	11.5249265733639
CKLF|CKLF-CMTM1	13.2153161276651	13.4609302399847	12.8017072993232	14.0551965373355	12.1180264447141	10.2974701997554	10.7638911710925	10.3408662706439	9.64744733205142	9.43608937639851	10.3128880160501	9.88615640120958
RHOQ	12.6212538756644	12.926127107841	14.4808418902219	13.2665542760558	12.1881146236403	12.1667139893303	12.2546383630836	11.902938969153	10.6492984749911	10.6877293435907	11.0018697928051	11.243684959954
VENTXP7	12.4245652377932	12.5539962269216	13.3276319943365	13.0715796164847	12.3705586146471	13.0622207674777	12.6615925434578	13.0167961902689	12.0196656829659	12.2904032912185	12.5167141214901	12.6382331841237
HADHA	12.7399844578827	12.900745239579	12.2157695289537	13.0130172238786	11.8963113684908	12.6773214819208	12.6384504698411	12.5175897882405	11.4653787223622	11.5682203908536	11.5317721552254	12.3936651812932
PYCARD	13.1000997773318	13.4939167949914	11.4984084836245	13.7530550366538	11.7886261167377	11.6419899834426	11.8191860242668	11.593768202863	10.263848065097	10.4853313622013	10.7443922867574	11.8330393530552
NCSTN	12.7409294490832	13.1739258383012	13.0480175682586	13.389	11.9955309873816	12.368970247784	12.2624443555267	12.0275571991204	11.0315992684448	11.4666387020108	11.6620225484147	11.9449908018096
STIM1	12.4520293925024	12.358973012901	12.0973669186418	12.8590561793069	12.3564611243183	12.7554762770967	12.9855821522114	13.3659186608714	12.4298714984899	11.9293149485973	12.7893334412488	12.5291891172807
PPP1R12C	13.0129277512322	13.1470932871644	13.9121994650592	12.9770014151489	11.7289518347821	12.3311639411664	12.3405618492825	12.5393614897065	11.7903391110574	11.2839188758519	11.9578085289567	11.6502212265153
TXN	12.6949961527164	12.9032326109591	13.1327708014999	12.9265102324315	11.4219557318471	12.391468715541	11.9265821519468	12.2741903798298	10.3835037612051	10.8505089861142	11.5486336018348	11.492300493345
SMARCC2	13.1841904655612	12.9967068497912	12.0726904359995	12.6828826087817	12.6009992102609	12.3198478077585	12.3993285498782	11.9904196972324	11.6397458066702	11.5358040376879	11.6377136562147	11.4984595759116
SAP25	13.0697982746454	13.1991120920822	12.8659337648567	12.9489443514917	12.3483981362307	12.6000992080825	12.2575922598063	12.1063930405051	11.3556415329101	11.6904698415342	11.8991231511313	12.2085393292745
RRAGC	13.4082376572073	13.1906038256748	14.3116254955377	12.4548121897818	12.2079847126943	12.2605494484428	12.4029428042513	11.8613666887919	11.0285429370869	11.3921801358703	11.3442056850506	11.4047072753359
LOC100653309|PI4KAP2|PI4KA	12.7154696157239	12.6008658057907	13.0106618197923	12.8883709157217	11.4343425858759	13.0302896545351	12.5098426350088	12.8335124964915	11.5289404289778	11.9918308161582	12.1315885236389	12.4998520023337
SYT15	10.552437756937	11.1199564789996	12.914922180625	13.7681872449079	12.2187661321668	12.6318	12.3124297681369	13.8389129941199	12.0192808248897	11.9000703166977	12.3635007476568	13.0207445198409
BIN1	12.9579091183078	12.5273695332505	12.4972694605244	11.6815815404111	11.8894476633635	13.3787185040779	12.7586127628839	12.9407159942031	11.6546902605811	11.9667595554635	12.3068	12.2457686894028
MATR3	11.3417804488068	11.9204864023723	12.0806759726982	11.0300179208684	10.6505546680111	14.0458728068217	12.5137721513021	13.2000482976289	11.1945412077137	11.8587347287857	12.5485734244935	12.6246524577312
TMED9	12.8509334442589	13.0597532950482	13.1447614004418	12.6969586067012	12.0814310720402	12.3297886676475	12.7207099055309	12.5236098332341	11.015480807813	11.0034236075076	12.2881564111199	11.7208110281763
DSTN	13.007889515607	12.7708286114982	11.7784178356313	12.1419166207985	12.6570978852957	12.2682280410799	13.1212136055277	12.7320445241844	11.9715406164684	12.0558707158021	11.9929112751155	11.6608211997728
CD164	11.7729906406401	12.1718317485651	11.484159740946	12.4227487768821	11.7726467333305	13.0401900981577	12.5661493989697	12.8295419411884	11.1218368366906	11.6619166125553	12.0470938061089	12.4325365727416
PUF60	12.9733845773145	13.1334370708034	12.0096522962462	12.7123895292555	12.4381466864574	12.2868696592923	12.8506687163619	12.7120546178138	11.957547889163	11.9860836905249	12.0621769210725	12.0469388531297
USP21	12.3290477700988	12.5275230901941	12.9748629903298	13.2741458539456	12.0858256577988	12.7812631075123	12.4895895662197	12.9138819701214	11.5867059577192	11.5354761675203	12.2510554123737	12.3120940127261
NARS	12.6981969692788	12.7886197236835	12.4565494604536	12.9424793749574	12.0686339173033	13.0585	12.9312285682641	12.3332129208022	11.1332633891985	11.590486100768	11.6274628058246	11.9763896147794
TGFBR2	11.5803919371251	12.2987100483786	12.3919294896133	12.7408667863867	11.4520091996462	13.4685243311222	12.0115849428316	12.3406718163509	10.8487497026896	11.2358934424834	11.796721826839	11.9927596716034
LIPA	12.1813320426196	13.1320239175038	11.3700938766953	12.2880557837721	12.398904718442	12.1411199564981	12.7759252557086	12.2135979546487	10.752	11.3409422037543	12.3542950994442	12.4504871749534
CDV3	11.9113283366967	12.5567073049749	12.0748530514711	11.9165133316285	11.0391200728415	13.4963329091511	12.7038647834117	13.010886425994	11.1074251899402	11.800438286585	12.0884657146215	12.5600948589981
PLIN2	13.0002426424146	13.1631933325188	15.1285035957387	11.2011938909376	11.0266623128696	12.9303864842406	12.3975967876117	11.6337847008061	10.8821500746509	11.3721231527701	11.2685736450916	11.9463778063322
GPR65	12.9290594859343	13.0180663605553	14.2350335565358	13.1484906042162	11.9130688156342	12.397870428617	12.0924408828968	11.7622777738556	10.9897822467152	10.7680686381663	11.4553459510708	11.2238058241003
PFKFB3	12.3507877814821	12.9922632277276	15.5270830670898	11.7099211337083	9.65180272024835	12.3328125406209	11.9138621561067	12.6044254267676	10.3336097232158	10.5149026591479	11.193925924422	11.3216397739069
ROCK1|ROCK1P1	12.5410603158626	12.5290577633203	12.8809664174829	13.012533197526	11.9829374186215	12.9090569508378	12.777015556758	12.6712241734892	11.2605039976424	11.6179983808435	12.208069862825	11.9313971623546
DGUOK	12.9807176721902	12.9278732656795	13.0563593647885	12.7970318936237	12.8883889094272	12.5681078376683	12.6626416453615	11.9464463143254	11.2094624476337	11.4151734769164	11.4675474147203	11.4707752325343
NDUFAF3	13.5111275992157	12.9733363710052	12.7855569222415	12.7414510833816	13.0594903845153	12.4049406105257	11.4346664653242	11.3826097886716	11.2161941467543	10.7995383959584	10.397363789051	10.9022503642121
BSG	13.4194114018218	13.5206223548081	13.5252892178891	13.2482726117428	11.4469836318592	12.0147892163396	11.6331580044498	11.8270826149615	11.0331250094981	10.8807650785049	11.2749674335058	11.6367534079513
DKFZP586I1420	12.8454208612771	12.8593771109212	12.6251088187708	12.3094928083152	11.9234442305316	13.0380582458939	12.9469221063763	12.684572387439	11.8956	12.096444728898	12.2289480625807	12.4192377032805
CDK2AP1	12.7013906998924	11.7954799118941	11.709103833037	12.8602671769991	13.0436455281483	12.3740497372173	12.9800171124512	12.457338986951	11.766688890633	11.6005513755402	11.5814731511429	12.3426995999839
FAM134A	13.0168342507416	13.1543704937881	14.0958662385952	12.6045965759933	12.2259092425138	12.2544736603916	12.2095884151814	11.7648674964613	11.137525121107	11.3446897548437	11.4187894008145	11.8662095688077
MDH2	12.7058224231359	12.786183207954	12.0589909021217	12.7376489156426	12.0438832082958	12.5642145234304	12.9652129211058	12.6827149686062	11.5429308802868	11.7745557203031	12.2720772479834	12.3632245030119
SPATA13	11.9606038090309	12.4095058395698	12.8700491381094	12.1927910556388	11.5449842359121	13.5446336951868	13.1598048051229	12.9063619061811	11.9707446775245	11.7356963375846	12.3928468848603	12.1270986025163
ITPKB	13.0280483468581	13.0916752575738	13.6270211019869	12.8296830350601	12.211587478909	12.9381089140731	11.7361615956006	11.7150411137422	10.9952718399468	11.4604345951543	11.2594986049369	11.6111846153588
SCAF11	11.8917692780941	11.9035483868998	12.2733999680139	12.6376158126903	12.2334341835612	13.0589043353711	13.3007375689477	12.634271428956	11.9118367322784	12.012709877409	12.4421403760257	12.0631712682201
HNRNPUL1	12.6752170051732	12.8659499485731	12.6600988604452	12.3794838161558	11.6055165841066	12.7906	12.9985189891873	12.9993865417495	11.6119389807026	11.7436659425547	12.2455123770773	12.2158899501077
CLEC12A	12.2827066726498	12.2369469861946	10.783204636279	13.2919051656364	12.5600247653898	10.5670646811977	11.0518530556239	11.7238145819711	10.200080406656	9.5955621871219	10.8709442883482	11.2538028399154
MSN	11.6455681976574	12.3974577487817	12.2371689276296	12.2078791454732	11.0121530175704	12.7756846397733	11.1899616960889	12.2463979634519	10.4614974286795	10.9404286990611	11.6312787721246	11.8934303076423
TUBA3C|TUBA3D|TUBA3E|TUBA1A	12.9529077236425	12.9328672365522	12.830406846686	12.7062668820216	11.5752388929781	12.9748230156361	11.5626933648261	11.9745259049933	11.0759438784809	10.7591102169385	11.1879592507364	11.852958905926
HNRNPR	11.5206461288205	12.166516983558	11.3619701081608	11.6024190482877	11.5382489515746	13.4457664724236	12.7976956231023	12.7952078720777	10.9139667684279	11.879033807084	12.0090198174984	12.4513422347443
PSMG2	11.8721878604159	12.2077303770658	11.7805394205362	12.015972259257	11.6013222303778	13.104279332419	13.225172819832	13.0426373116189	11.7229271666039	12.0134163649457	12.5806554856061	12.5763111430808
ABLIM1	12.4541711783086	12.9839	12.5990493913821	11.6417609407191	12.3514750666894	13.1051906540268	12.8266500689886	12.4759734474924	11.8525825893058	11.7022022261059	11.9328134635563	12.0254450964019
UXT	12.0003812930754	12.321560382271	12.4017830968904	12.0375431636226	11.6455498961433	13.1108600633957	13.0184265549624	12.9023351198473	11.9555378030078	12.039316119407	12.3292146736346	12.586132104062
INF2	12.8651188246642	12.815530610113	12.6754291946234	12.8391312876995	12.4292551341805	12.8199810847767	12.5757880094484	12.6206515902695	11.6971737838549	11.6207827883468	11.7988114068581	12.3318623668376
BLCAP	13.066248209719	12.8816516992231	10.9704789156973	12.5860110307483	12.6113042195377	12.2743416247007	13.016376306618	12.5140756224056	11.644245419667	11.8495325009335	11.6740251014037	12.7171376024397
RNF126	12.5182497652171	12.5437081515087	12.5677580937544	11.6272912450781	11.6936236446367	13.7208203415003	13.2008250303118	13.0363734128395	12.2539304095068	12.3716266956168	12.5776161162642	12.4764011849429
CDKN1C	12.6191996382883	12.1422549594766	11.6174243591999	14.8055314624884	12.4241495341909	11.9403252884349	12.6200708659707	11.515744760684	11.081853118113	11.1553933480984	11.9580422815608	11.0547103206119
GIMAP7	12.0752922050802	11.6008174374025	11.2222357363079	12.4209261449391	12.4383	12.5556905034437	11.309983143613	11.436047388374	10.2455385192886	10.6615270746048	10.6572474681324	10.6859920766861
GPBAR1	12.6050340882819	12.2769540923921	11.7723008426825	13.8814657506356	12.8944667623127	11.8211471665955	12.1264861106183	12.4716770810045	11.5809802273315	11.2959699009259	11.6129881383648	11.8459161232857
CXCL16	12.4178277760922	13.2990996933992	15.6227555615026	11.8814225909643	10.5984110304796	11.3931256535526	11.3629003990851	11.1539080877156	9.92562947779463	9.96435258736751	10.1472870239129	10.7776681981723
AGER	12.7833501256565	12.5333461827808	13.7945035545239	13.6064861653756	12.1876842897183	12.3530821299841	11.9127603360911	12.1924550690801	10.7922056989637	11.2204751331543	11.5308296050375	11.5858221152392
ANKRD40	11.6409471607176	11.8091869246335	13.324545444921	13.1309822900428	12.4318011744825	13.0663005619272	12.5159506000504	13.4013030403729	11.8242220228376	12.254000489984	12.5350054949803	12.3292067437206
GRK6	13.0667866602707	12.953815146766	13.3894063099486	13.7757655493502	12.3402898320302	11.5515954357656	11.7349152869738	11.7099	10.8548018635142	10.9881704873629	11.0561598966766	11.1021486454907
GLT1D1	13.1306022404565	13.4528676174099	14.2958133723587	13.9037576592486	12.1435456913988	10.5605	10.1853597567425	10.6439070970761	9.81112952162012	9.39330606407337	10.4001191437768	10.3096226213787
SNX2	11.8043251224205	12.2740283513586	11.4707546347221	12.8012415026397	11.6890701573365	12.9562856962729	12.9803326883719	12.9403069207197	11.2141779331887	11.5338356985487	12.2720772479834	12.3233471093117
CCDC85C	12.713682865099	12.7308449637512	13.9126831631461	13.5740509282251	12.1945542797237	12.3049002208808	12.3023683574015	12.2886598396626	11.3335227378247	11.5595395088638	11.6545420426554	11.5840410687582
GOLGA7	11.9120476785458	12.2448135252077	13.4924185107029	12.3895838174583	11.5945208703542	13.4735147967507	12.6794539244695	12.8104192044717	11.4217814890619	11.6241786714952	12.2308839458406	11.6979372523216
GSN	12.9685518976497	13.3188419373799	14.1203098263984	13.5055319786223	11.9088976662848	11.6394758977678	10.876682207025	11.3205931789964	9.89910069173146	10.0893390880463	10.2922712952125	10.9368523009348
DRG1	12.6857715763359	12.577027986858	12.0182182339522	12.5427522792296	12.2942612958725	12.7288028014409	13.5541602960943	12.8228112016787	12.3278959795199	12.3942242130056	12.3698396523512	12.3376875871605
RSRC2	12.1528075625963	12.7077219184416	12.9661514346658	10.9392167276448	10.2409195868193	13.6194069256827	13.3302521836122	13.2165611256353	11.4351149623224	12.2164508099238	12.740162844423	12.7572033176752
EIF2AK1	12.8251956497366	12.543252571484	12.6202306326186	12.6373018915997	12.1053233859291	12.9626293435823	12.4463836618925	11.9742062361884	11.3768256141088	11.3167245713699	11.1670816117649	12.0889889180131
KIAA1522	11.5359717011778	11.6317159685545	13.0095317182071	13.3894487230012	12.5608557631971	12.8130421619658	12.4419604926765	13.5471631127145	12.1217864676596	12.2794806810017	12.5144907758595	12.7336993449112
TOB2P1	12.0921057088776	12.1861040338313	12.8281010073869	12.8411770933155	12.3182456525556	13.1262578123276	12.6510593496442	13.2535815222108	12.4704158250513	11.6077426612158	12.3694882207553	12.318936712218
IDS	12.6788846740536	12.9317073897033	12.1758277116616	13.1509117049537	12.2510471984521	12.235503822434	12.5599692428643	12.3889563945398	11.8038091618158	11.4861108552584	11.874815302567	11.4979867331067
NKX1-2	11.7265841890969	11.7700070698473	14.2745200183212	13.4245282152346	11.9378455863574	12.625878641474	12.3157680389567	12.8113142770819	11.3098012692449	11.8421282219995	11.750508187908	11.4975137347778
PPP1R15A	13.8350131251356	13.8989855851057	14.2914031000112	11.1315784813753	10.2508407420533	11.9560993129427	11.6424935016369	12.773142851375	12.0242759910741	11.2990635710477	11.8478220345398	11.9013185961865
UHRF2	12.5017783491064	12.6656453034515	12.3146116679753	11.6888702724664	11.3769897903812	13.3595274310436	13.5360991484756	12.9640045037323	11.7267036833242	12.2317095934284	12.3062633463805	12.3811556845672
FAM134C	13.479770784946	13.3407665201864	12.428580831373	12.9256107125982	12.567321170346	12.4876791352189	12.1820502913813	11.9133142752883	10.8956	11.0241367609303	11.6301057034524	11.2123221107258
CRKL	10.4143946202773	11.2968498184436	11.5384500202201	13.4932686785533	12.3235435532142	12.9545020853357	12.0097310740326	13.7329806016507	12.4287127397833	12.4352242565286	12.7092523252606	13.3175832792419
MED13L	12.8675931699047	12.8864488267747	12.7113204993325	12.5592509734862	12.1162185560194	12.4968584596497	12.657388489832	12.3219517689806	12.2171540507096	12.1582276825542	12.4046	12.0428925709549
YTHDF1	12.5774884182301	12.6327628861413	12.2071200950176	12.3604011437811	11.8327794468105	12.9687096087107	13.2310193034551	13.0521339141105	11.7417116642586	12.060207795718	12.0771039749883	12.5732844415916
SLC6A6	12.2726597885226	12.684773094098	13.4289979165117	13.3110238954246	12.2920609977335	11.6213039374941	11.9839433600657	11.6512862962155	10.7557061729318	11.0086298422851	11.3377528891879	11.5449780490044
PSMA1	12.2034390241926	12.2582000231365	11.3788724827194	12.5185827109508	12.0203930508971	12.7448522330051	12.9303577285654	12.5603836627596	11.7323499879751	11.8970108972447	12.2374465860665	12.1217
TIAL1	11.8956538696326	12.1759519612046	12.6145928184455	11.6263425094905	11.6272597436347	13.346574963301	13.0440130971424	12.938587544293	11.7290589963367	12.1123601290024	12.5111493195388	12.5324251013933
MRPL23	13.128746846949	13.1770615645857	12.2612971734467	12.9607848100657	12.4406770970866	12.2697588674816	12.9134907909143	12.439039906718	11.9303772334141	11.9377755007637	11.514711308775	12.0567644147495
TAX1BP1	12.1210140775834	12.2286595837181	12.9083886995203	12.1472178512538	11.6493052876017	12.9956713510155	13.1517017810991	13.0257699402489	11.7966407887862	12.0237386273527	12.0888927124183	12.3575016897512
SERTAD2	12.5143074258021	12.674547706755	13.6231841571892	11.7996221974083	11.0410271388009	13.1436861484603	12.9630855807903	13.0783965777926	11.687517608252	12.0839	12.1499161916147	12.7372093796606
FDFT1	12.4896214937203	12.490822664207	12.324460616086	12.1314782757931	11.6446095189899	13.1568791531506	13.291950600207	12.8384384198661	11.5049507563674	12.0370017723644	12.525888796699	12.0803289870578
RIPK2	12.8106102218994	13.0369585028282	13.9130458307836	11.2647617735115	10.4090921930792	12.4715565722303	13.562544857542	13.4920728914577	11.7210351941904	11.9711301086995	12.4881874579545	12.3865301847594
NDEL1	13.0926102984361	13.2132137931523	13.4874754284628	13.2210892199306	11.9488070127695	12.1277813768821	12.3684773541323	12.0513908358195	11.2054082995897	11.3480542472112	11.2272787357094	11.4142612267338
DENND4B	12.9185975726791	13.1742201023148	12.6068420376949	12.7308973583304	11.7503820296717	12.5485353410696	11.9036935274828	12.1452464060411	10.6661128257714	11.2764826971414	11.5980668288445	11.7120719686164
CCL15|CCL15-CCL14	12.5755222194345	12.5999899118351	13.0457040675868	12.3290618422053	12.1448763864899	12.7358810195149	12.7491	12.5354667531247	11.9515092092646	11.9140102339021	12.0448947054024	11.9236720697137
SMAP2	12.9671681533393	13.1114785433262	13.3454765771311	12.6344735234906	12.3845196811726	12.5235700065081	11.1594438372075	11.3415629912755	10.6383132353474	10.602650998293	11.1331187552475	11.1749476272729
SEC61A1	12.9172844830735	12.7976883518297	12.4224799628455	12.6875898841267	12.3751013477626	12.4255164763843	13.0729070762487	12.7627230325795	12.1578987386845	11.9817582722375	12.2726411760409	12.2794500395085
MMADHC	12.8151039107235	12.8816516992231	12.9464445297541	12.8110164172909	12.1971221151443	12.7303324160712	12.7514812676428	12.2663787712485	11.2754063950988	11.6845676748699	11.6007640790109	11.8185326129452
ARRDC2	12.3436959430439	12.7256343424781	13.9978930546935	11.8257554202442	10.8820190680425	13.0137125540927	12.9455220454118	13.0353012434808	12.1452561930989	11.9555298366707	12.2382167022869	12.897450369629
PPM1G	12.9481227499926	13.0402985328445	12.1083878931527	12.456948342544	12.3034263563803	12.6815686516388	12.8216101309317	12.5760570091106	11.7671473778911	11.8702205842975	11.7791017486679	12.1325921410862
AAK1	12.7507476459142	12.7348403670057	12.4959789007666	11.7903343377426	12.5123643413969	12.8891513080012	12.9224964268513	12.1697419491488	11.3804261418139	11.9160266837709	11.9517176282917	11.5495484518106
MOB3A	12.915252809038	13.1460935448256	14.2853460582926	13.0714634382087	11.949060941221	11.963212703573	11.5386095026973	12.1357021835389	11.5311016567994	10.800630228222	11.2969403609243	11.2048083783877
RNF181	12.7767829944746	12.8189221828704	13.9022477395818	12.5059145699788	11.7697745541183	12.5043551705288	12.6051421428567	12.2576055285378	11.2493893930202	11.5173275898243	11.7380392759256	11.8388387912714
RPRD2	12.5198236895518	12.5421889921016	12.8466984958858	12.3921908349584	12.3773673617977	12.6224379285468	12.9297042538407	12.4088441423398	11.9089311184039	11.7817613072032	12.229722727813	11.8771595731734
ARPC5L	12.6269610185398	12.6730215104056	12.329541129856	11.604347592391	11.4800442545825	13.0289343145783	13.2434307038066	13.2716439223214	12.1938113729288	12.3614891599941	12.6474012387429	12.5587352381615
USP39	12.8353436974939	12.7937358192036	13.0449320756479	12.083202254414	12.0786486307924	12.8645416942069	13.0496378925996	12.6899356846421	11.688001955349	11.9387676056341	11.9275710960365	12.155109411656
YWHAE|LOC649395	12.8818612841047	12.8610840574455	11.9781095608806	13.1057904771825	11.9851678161486	12.8552675013948	12.1464966699699	12.1483666096697	11.2161941467543	11.5256052556684	11.5436581296456	12.0456452772011
CARS2	13.1980196797745	12.9927082063606	12.5236329967477	13.3424643569846	12.5284267300676	11.9116861155875	12.2881634472688	12.1190270811211	10.9636176053176	11.2044778544932	11.3240347944223	11.8481438763654
C19orf53	12.3003968492993	12.4418026351298	12.9286186796035	12.0852751091689	11.7674726863822	13.1438948501209	12.9865250306168	12.9841475166305	12.2878766726732	11.9061697600799	12.3694882207553	12.3956972873343
B4GALT1	12.1471158329101	12.6899959388074	14.1234473643061	11.8127479807215	10.4179250517268	13.3449420240039	12.2641732998763	12.9522043684831	11.7867257551503	11.5403864119123	12.4692887916965	12.1953297552459
FAM45A|FAM45B	13.1443401199491	13.1696030557387	11.6218683777248	13.4984630781553	13.0968685981909	12.2442901371523	12.2110233312167	11.2409858473977	10.730536403681	11.0970454931719	10.8808414330975	11.2317903784392
FAM107B	11.732840548346	12.049060901318	13.299057522274	12.3541111017057	11.722430497156	13.3668769631698	12.3850981332546	12.1349873899552	10.6611877383981	10.9139354226161	11.6028584590841	11.7496971331818
RGS14	13.2148303628309	13.0982032215585	11.9325672492286	13.8059661972962	12.6702492541331	11.1857794137093	11.4061364406912	11.2027500428942	10.560040058753	10.7393175501621	10.8059421750901	10.8777436449922
TNFRSF10C	13.6316102755909	13.8048220723877	12.9092373031502	14.1807056349492	12.2920609977335	7.9790848895352	7.33670734042413	8.59133700585538	8.50549135082125	6.75153691722887	8.77876139195372	7.06885101377309
PGRMC1	11.8483338474863	10.6126394489688	11.6869364353594	12.0361150942818	12.5744162716663	13.3887035515521	12.1464966699699	12.8108668101916	11.6144891376768	11.5841594569229	11.6502086566549	12.2972238207717
DYRK1A	12.1049555340525	12.3537863601488	12.652734152293	12.1062951981837	11.6505549152744	13.3007008773593	13.1747729833707	12.9847823943138	11.8073800357623	12.1217820898282	12.2262334546222	12.3067043871166
ARHGEF6	12.2702306087582	12.7198674001305	10.6750300637845	12.9907050815893	12.3255008117822	11.8822167208069	12.578708763596	12.1708582418838	10.7154111040953	11.1545396078606	11.5311438568598	11.7271
RABAC1	12.8794113099764	12.7852845059963	13.637812972415	12.7888583211433	11.5034011948125	12.6212392327437	11.895015799011	12.1656881324251	10.9507588493331	10.9289913210876	11.3823278654605	11.9045332328433
DOCK8	11.9098885760908	12.4565552933266	10.8564361604862	12.9732752680187	12.1261340258238	11.7516375755842	11.5579086488718	11.3028824519729	9.62333959354847	10.4523650834306	10.790274107653	11.0959129386366
MIEN1	13.2567748272725	13.2663504260636	13.4140432310875	12.7043201167976	11.7602555864529	12.168151155082	12.2669353080229	11.875471763704	11.9519125754611	11.0408654449142	11.2163768660018	11.431201440594
UBA2	12.5160433824936	12.5522	11.7664254366552	12.1957786880619	12.6427270481181	12.8147472535626	13.277642232733	12.7962028535607	11.4546023043633	12.0599798530635	11.9078618005133	12.3788461838793
MRPS15	12.5662602531675	12.4886159049202	13.575945102533	12.0587962897618	12.0739992706547	12.3155002097584	13.2936	12.7745203722912	12.1073743158768	11.9293149485973	12.1441752469079	12.2813746939763
UBAP2L	12.396396746522	12.7024269554938	13.8275197004258	11.5463429715904	11.3219756765521	13.6063653934413	13.0715254085278	12.7570667392442	11.4153607852428	12.0351476177039	12.0159971056168	12.4080818652094
PGP	12.9593017675748	12.9257776225528	12.5906099691237	12.5793265536077	12.3518592217827	12.4452950732883	12.951543421456	12.8445722659929	11.9643613087156	11.8618763145977	12.3121269347411	12.1257219433714
OSR2	11.4593034082761	11.7681888195426	13.5461708261818	13.6396194067951	12.2166584691459	12.7274108339804	12.8966472634774	13.1574624403006	11.9365048273148	11.7667553972539	12.1704368172295	12.2263466814459
APEX1	12.3189579820507	12.5973590343209	12.2552074883269	12.0038475783937	12.0121532103651	13.2555912426345	12.8753124930454	12.4678220878593	10.9604136446981	11.4847529299103	11.4884120484542	12.3925208625165
UHMK1	12.1181076062205	12.3910582363262	11.6058054358731	12.1017515947385	11.7617018977024	13.3174969527102	12.6613301486815	12.5899980336446	11.134685365331	11.6937057701258	11.7620672559882	12.208683819533
SPOP	13.491208512251	13.2384797751315	12.5766371245525	13.0059828972193	12.851917350118	11.7849386910161	12.0122023700914	11.2753830605056	11.032362340323	10.9214830120949	10.8291297741832	11.0643235948909
VPS35	12.8938063817996	12.9816544454844	12.2850285173639	13.471949977182	12.0837456804262	11.8965313102917	11.3443868630868	11.2032956716025	9.96931944345788	10.1599537496398	10.7818477037334	10.7172025647173
FAM195B	12.8812491804161	12.8414546973648	13.2301939093544	12.7423270854086	12.2672263618446	12.1637324408801	12.9464914630252	12.8291000930938	12.4199922566579	11.9442120212758	12.2312708109074	11.9201469425305
CKLF-CMTM1|CKLF	13.1960521754144	13.3275988825584	12.7676202694602	13.8829229216715	12.2122223282707	10.0544729378757	10.5498149594135	10.2613529084769	9.31258151712677	9.57529044633091	9.76023556465966	9.8621074435903
CNOT6L	12.3782911098859	12.4164877067147	12.8688032944748	11.8046632129319	11.9564054955019	13.442800913844	12.7304982675527	12.6853537435092	11.491695372587	11.8086018831034	12.2664258095442	11.9522577446892
DUSP8	11.9442867982282	11.9494284741571	14.9285828130253	12.6557073461127	10.8595016249805	12.6427	12.0163118121264	12.2715912072985	11.9699482992165	12.2490099824595	12.0285163333534	11.3699862359372
ITK	12.2734064062474	12.5105330549262	12.6284990384788	10.7028731264635	11.9306628779434	13.7944556231796	12.901098871562	12.6400261884048	11.2375269034897	11.5992970495071	12.1888781957241	11.4606191348271
PSMC2	11.9540991335316	12.2382610583156	12.0195661133799	12.3083101824924	11.3426109907676	13.1059407220731	13.4907440354016	13.0959859604589	12.0200504384034	12.1110405310778	12.4377890519617	12.1915332692927
PDLIM1	12.744837832019	11.4704668699905	11.4661486050537	12.5803067063959	13.0423370689297	12.6104059144496	12.2731305604856	12.1619036223312	11.9047700638291	11.4012055760109	11.3556	11.5692629285677
DAZAP1	13.0770861282671	13.0110548192959	12.0871184399116	12.702970815705	12.3200137819048	12.3390236366126	13.047430766145	12.272631438185	12.0869523233069	12.0604357023638	12.1365537881278	12.1989708251629
ZDHHC18	12.7324021617163	12.9300820359606	14.9666989130988	13.0000132587503	11.156357777329	11.9613192258903	11.2347375449057	11.7180988100075	11.0766838582848	10.7702995783981	11.3283809325542	11.2848344239862
FAM96B	12.4617243751367	12.4227756506439	12.2660369188924	12.8210019939926	12.1998987890884	12.6155317866976	12.7562804639099	12.6285951869236	11.8594789728828	11.6679119833446	12.3391197604236	11.9178509825682
HM13	12.8362282647695	12.889677893884	12.2934102746534	13.5287350927032	12.4094617495102	11.7691961730549	12.3214254315494	12.0806396405359	11.0528141886287	10.8797322599096	11.4734461563101	11.7879140503138
ISG15	13.1339976102054	13.0707536365219	13.0505471528547	12.6891050894043	12.3026317017272	11.6503877367573	13.0235394646045	11.6088790199049	11.0965211859237	11.1883011996443	11.9685221424477	10.7461602892135
SNX5	12.6137564597991	12.4816583193532	13.4181371804666	13.3569307560243	12.3256963918707	12.3587572996301	12.3964936735992	12.0577408763748	11.5359526135144	11.2662443608053	11.6019612398972	11.5988898672282
PELI1	11.7172856743733	13.1768657813093	14.2486514481245	10.5611302808219	9.67409374601569	13.6327778055515	11.7216377933041	12.6869151876969	10.0559250333481	11.1630543641494	11.8455496310591	12.2173268669322
TRIM8	12.6650114508784	12.7276406553912	12.1940479295593	13.1938107923006	11.5945208703542	12.391995956336	12.7387291695981	12.2611474347285	11.2760508463125	11.5485331965834	11.8563745120348	12.0601315603859
NKTR	11.4904613270701	12.339163741072	12.8001395877473	11.4398508224292	10.8627399998775	13.7366124206866	12.3831900944214	12.6218765325745	10.5462153355734	12.0411649278591	12.2437877853882	12.2464726001233
ZNF662	9.79283377032638	10.2967303865717	12.3776350224389	13.7053350405983	12.3850828306686	12.3912929256927	13.0652914763666	13.5351856307122	12.6467041474986	12.3996385871015	12.8930982070864	12.3520177457055
PSMB4	12.3048	12.6818786525443	13.0662845286724	12.5615689688221	11.6392691057848	12.8223953249077	12.1993231194609	12.2968634093528	11.2598525625278	11.1866317534941	11.7580455328093	11.8069358021511
EMC6	12.7707147177053	12.642862478151	12.3933165185011	12.2876557823785	12.201817975887	12.7536312552768	12.9618076693358	12.8890003291239	11.5386405583067	11.9525859121764	11.7537433015463	12.2527923890534
TREX1	12.6348261289782	12.6052373171088	12.9382719851432	12.9913193105318	12.1829421227758	12.3569580759194	12.7202061437395	12.6206515902695	11.7676057199024	11.6275665800222	12.1268140554353	12.038347220781
GAA	12.7022226856594	12.8945675135758	12.1920569247208	13.1739282081886	11.9198213168197	11.7491704600241	12.3892235802177	12.4200363840946	10.9172754373052	11.0800603376601	11.8092141504384	12.4139838978707
ZRANB2	12.3285090308582	12.4029922828114	11.6922990255577	11.9467228530641	11.8158926741777	13.2027783900433	12.9231531738157	12.6401269445247	11.2702403937904	11.8250600847049	11.6206866552144	12.1833221309935
IFNGR1	11.1135763266655	12.394766676264	13.5455471954946	12.410309228707	10.4584447431523	12.9313540517234	12.1003988634603	12.8500705180136	10.5094192965716	11.2367003854685	11.6938100867415	11.9711185353968
F8A1|F8A3|F8A2	11.7653149245685	12.121245452381	13.2325205142187	13.0237450199262	12.3012400024124	12.6842975118068	12.3250743110375	13.0953247025942	11.5788924967833	11.5961564558795	12.1377924388805	12.1078597429917
IDH3G	12.8923490195599	13.1491904937968	12.9859375678685	12.3445281725528	11.850558644378	12.4396959459561	12.6141179014474	12.5669702605949	11.2493893930202	11.590486100768	11.8035019262936	12.3004813236949
ZC3H11A	11.8714483618068	12.3030221448704	13.5343540921124	11.8824825291467	10.989124278267	13.3515530772797	12.3493843291676	12.8511154325128	10.7352307233927	11.4451557247841	12.1836903532474	12.168244977378
CNTLN	12.0567633487385	12.618705430066	13.0288471979369	13.7115361895248	11.9249941274042	12.5266143672311	11.7645335052905	12.7130128252843	10.8947932463765	10.9542311804282	11.5414759531193	11.840331644104
PYGL	12.8691992216272	12.8854906764579	11.1665426900165	13.9286636154708	11.6009990823088	10.630398172218	10.7991410085747	10.8915052149376	9.5073795500232	9.5006654260678	10.2231564959239	11.0675138372153
ATRAID	12.5919256707136	12.9014563547734	12.1532869409569	12.1976960468954	11.6987669487063	12.9364231611137	12.579681035608	12.3875167216851	11.0270123406153	11.4283012225408	11.3892783019845	12.2036180259919
FAM21A|FAM21B|FAM21C	12.3428070071657	12.3620760776583	12.5401623804194	12.6706633605696	11.9591816089635	12.6058679121106	13.1679549286099	12.5539807755506	11.7081990697176	11.6425622615453	11.8932678395178	12.3333208783274
TIMM17B	13.1541023677681	13.0834474327815	13.8132773121223	12.9640427464476	12.3286269131668	12.4046793687129	12.3132650603609	12.0652641855743	11.3421648330658	11.3006079216353	11.2794636966583	11.7034847323596
CD151	12.9602294540037	12.5467416792174	12.3338816611448	13.1188911414101	12.5166537397362	12.6016195258793	12.1625301537794	11.9084705962584	11.1656194144153	11.3224371614474	11.6802725262039	11.797552340912
USMG5	12.2865949766536	12.6194259729408	11.7396859219999	12.2108357270852	11.7920273643825	12.6575048913514	12.6897825678255	12.8030585860935	11.0625589212923	11.443059648852	11.9892562130621	11.7502928192978
LAT2	12.9189554807383	13.2395112650394	13.4453044153258	13.1636107485094	12.2631474920562	10.8094673947128	10.6238617145334	11.2103701354494	9.6983385268112	9.71387191003495	9.97781169046941	10.8810111829689
LY86	12.6375833167013	13.3100315140718	10.3869250759365	13.3148566832721	12.3256963918707	11.6549344968047	12.7262397084703	12.634271428956	10.5589813085309	11.3067688457644	11.4013615706594	12.4248456300745
MAP2K3	12.7528906812257	13.0960305139657	14.5317954277886	12.6891050894043	10.6367488636792	12.188324956731	11.0009176798554	11.8417004436675	10.7547817474051	11.1845422253339	11.262529965534	12.2429496070086
YME1L1	11.9108485760002	11.810701918037	12.7518927181875	11.8389196645665	11.5426304616906	13.3330476180688	13.4144034679196	12.9794566461336	11.4130188805806	12.1921121006669	12.4954527031571	12.5118459044365
CLDND1	12.009372555706	12.320142790587	12.6848046951176	11.090432689545	10.4252	13.7533623915459	13.3325611073932	13.0942954762551	11.6792587357174	11.8836779256521	12.3819119170562	12.2492848135469
RASA3	12.9243134735847	12.6820166149055	13.1056334889093	11.7476373360962	12.2469222630293	13.2156924640943	12.1805862527603	12.1309779877925	10.7777165101195	11.3322857140784	11.7537433015463	11.5191127283522
ARID3B	12.3240116966859	12.3492761285027	13.8941876514153	12.0263186022836	11.8366273693629	12.6542121287223	12.961274872072	12.7057144378766	12.1019324229245	12.3336622905355	12.1590951153883	12.2839826248851
SBDS|SBDSP1	11.9055606535294	12.6639699699888	12.9184187285618	9.85124739269199	10.4046554015679	13.6355262307166	13.5034619705361	13.1389008708586	12.0758918813958	12.4476489839732	12.8252700680024	12.8899013101404
DGKE	11.1575126311215	11.2849092126737	12.3779853583976	12.9602829352843	12.8769568232127	12.6913827643302	13.0948356755552	13.3457967131469	12.5670553900991	11.9340490191099	12.6636877623865	12.5889099986274
XPNPEP1	13.0100189172474	12.3730554552779	12.7494578043142	11.9391022285329	12.2026701291886	13.0419829019642	12.7520974421844	12.3697631338184	11.5164501456182	11.6780472807292	11.6785713641323	12.1312207165461
RGPD3	11.9435833567191	12.1888251220659	13.9831730495126	11.4140614529722	11.4263397168035	13.6542537621496	13.0242538280498	12.6269692931311	12.0119489445441	12.3438093163605	12.6032489205335	12.3939193511701
STX10	12.745645142532	13.0185034525251	12.2081056009034	13.3906598230424	11.802183258789	12.0432624596134	12.1431181547003	12.1624649172309	10.6846763041776	11.3514109115373	11.7732688002555	12.2456278658574
CLK1	12.3653930574856	13.2149310979224	12.5821208873832	10.740187057574	9.76458949173472	13.7578350352696	12.5114448412143	12.946919672858	10.7895000371202	11.8655328727009	12.1529823263892	12.4056890667717
NGFRAP1	13.0866755542844	11.7385154878925	12.2490919890572	12.6041147647752	12.446983774485	12.7293592124686	12.0328363740969	12.0739423560944	11.9667583829842	10.9630349780249	10.5657260266268	11.6133691227929
EMC10	12.5797537842386	12.633761768148	10.9611563373239	12.6686679205391	12.1673124099739	12.3162411521271	12.9619142052169	12.9769858254387	11.8047027093466	11.6998633694781	12.1802881879216	12.0170541668611
LOC338797	11.3633308549183	11.455372315123	12.4616820994753	13.6687869897767	12.5362223532722	12.4041567433946	12.4654456523539	13.6061187192929	11.3881965952737	11.325853889239	11.9917700625115	12.2878173188128
PRCP	12.2022632701614	13.0303635207836	11.3419970838202	13.5017432163779	11.9311771162425	11.6342860019228	12.0056028173836	12.0405922716352	10.5006232902189	10.4839727021139	11.1887562343621	11.4440228217676
PPP1CB	11.6724218766704	12.2019693204319	12.9088736771067	12.4990203272335	11.3595207729098	13.3649088094489	12.316434767241	12.5675001300373	11.3179604771867	11.5305491539126	12.0051791876527	11.8004313162992
TNFSF13|TNFSF12-TNFSF13	12.6300247699063	13.0597532950482	11.0937597726596	13.6743056209831	11.4919442832959	11.8754457665395	12.1387896174707	12.2700294529966	10.6492984749911	10.6262442127648	11.1658678649839	12.1615428696761
SQRDL	12.6784619570222	12.8707994832778	13.6117606688774	13.2154223047524	12.0777199568019	11.6164993855993	11.6533530889701	11.4889193977781	10.4501209087946	10.9073620852208	10.7148187127589	11.4753462742589
SELK	12.4190091054915	12.8060675244253	13.4721335998218	11.3519030106269	11.0721351384301	13.4503299783009	12.6425770713871	12.9593283273993	11.6139794669581	11.6819038020005	11.8470649640806	12.1703237431852
RDBP	13.0873125887714	13.0760125542132	13.9251428041805	12.3019864190821	12.3395152304104	11.8314202565577	12.6300276054804	12.1426884831554	11.4488980069403	11.2302321653962	11.0145116766664	11.6819984832555
CFD	12.3620627064866	13.5102480377291	10.7116262669667	13.272933882836	11.4680452518731	11.8536647398491	12.4971075575717	12.7470911603757	11.175324576833	11.255136591993	11.9301946609651	12.4253430591973
CPN2	10.1970960964601	10.5082015427071	12.9492763367029	13.782452791468	12.0623098919757	12.6713	12.1827817540869	13.1922359207625	11.3091717220324	11.6726904057619	12.2866682119142	12.3643922868839
PHOX2A	12.9474211768194	12.5083562626621	13.8240526181163	13.1065844163219	11.6838921048001	12.3293299517463	11.8441376045187	11.9690818808521	11.0193349025035	11.0133465345805	11.534596117143	11.4309537556447
POLR2E	13.2445475046434	12.9745758802972	13.065197184883	12.6875898841267	11.9712334317151	12.1331526413908	12.1154183047968	11.9356508185779	11.5202629961823	11.2007608474387	11.5603820283192	11.767657748404
UTRN	12.245901374147	12.6471087540449	11.4578867966585	12.5173891255204	11.6676284316057	13.0004045568882	12.9290504828027	12.6185054352943	10.9410390059152	11.5321933620983	11.8947338966439	12.1061543771188
SSB	12.0073544015614	11.9009430330081	11.1378686219475	12.2338575568404	12.0505250263694	12.991734440861	13.3865774047261	12.6900330148598	11.9014325575718	12.1505	12.1758734426619	12.2399836296909
PIK3IP1	11.1879264719266	11.8089342708544	12.7317492281853	9.70074126017558	10.1747136968367	13.9811190421306	13.1499260838677	13.4727416550217	12.4182418167986	12.435927092739	12.6139693629435	13.1360747849021
SF3B4	12.8254502229275	13.1335379574229	12.779337581929	12.4726935205616	11.6474288135761	12.7356040957402	12.431689288974	12.4181574449779	11.3433952031028	11.2387157713873	11.9596774905455	11.7748969542749
UPK2	10.5238591284677	10.7002498083064	12.4263807147812	13.4842205112972	12.2633517098394	12.6110099044482	12.7583674353737	13.5939987242757	12.1427850023216	11.4069523659844	12.3841751359687	12.5974324599623
SNRK	12.1350485286013	12.3229765823971	12.6367203259575	12.2361396626319	11.7104974658955	13.079671699561	12.9128296294568	12.8442224622172	11.8321316984348	12.0004088045262	12.052358011313	12.2642377426334
ADRM1	12.9104610831669	12.9272914478014	12.8851624301034	12.3462578038461	11.881753270632	12.6665395869003	13.0077333041911	12.7712121094795	12.0784802457651	11.8980314246495	12.1365537881278	12.3939193511701
ACLY	12.8703100570138	12.8605965644576	11.4452375304981	12.7153667836628	12.4223217178229	11.9591860891449	11.9048022915451	11.6860555731812	10.2216509862932	10.7204038549745	10.7648457944548	11.0036617773995
FAM53B	12.6784619570222	12.6580909338938	12.2059365986425	12.2792300313661	11.569634905617	12.6156070313504	12.7294973840298	13.3214373246341	12.2552383418471	12.118502343371	12.2660482584428	12.3419093863111
CAPG	12.6786028763884	13.3636536171824	11.1077684171902	13.6063257894093	11.5745807289203	11.7367712004555	11.8191860242668	12.4180399299428	10.3618112359365	10.8217574586338	11.3035778823175	12.0902442253432
SETD2	12.0463172385137	12.2015844309274	12.4794222620202	12.2348953249686	11.8117097331714	12.8728755707751	13.4984029314803	13.0638986525574	12.1445505703684	12.0991095181971	12.3879971286552	12.4426458979039
POLD4	12.7664782030229	12.9451046254465	12.3704343237504	13.2210892199306	11.8055527314124	12.1317853933805	11.7853919770986	11.9014266555395	10.7749835113159	10.8249805151975	11.1034178844578	11.6024133571093
C4orf3	12.4876925913453	12.6246032848081	12.8888546865086	12.9229087825355	12.5560292997891	12.1222841256656	11.9700273349512	11.889609784672	10.6592129867716	10.9429031324824	10.9454565396469	11.4899245963107
PLXNB2	12.2405659784143	12.8592551087985	11.5160237657882	13.939271033971	10.9193028092595	12.6010875969068	11.9398401697644	12.1545868451687	11.0193349025035	11.1803540679305	11.9370885496247	11.9984539461721
STAT3	12.1987302481888	12.3644849665312	13.1702692827935	12.9650437100132	11.2692613193375	13.1476463259099	12.2360822544574	12.5877012783332	10.8685407704595	10.9601063440675	11.7262852873757	11.6294324861746
DHRS4L2|DHRS4|DHRS4L1	11.6822942503046	12.1903777285259	11.9241955490752	13.6108095819359	11.9762254616639	12.1319958236099	12.0523791856541	12.7147359963239	11.1016199784922	11.6049329470301	11.9335268580941	12.4118519062452
CHD1	11.6741190888065	11.9721712279066	13.5053842423113	11.507710203406	10.3957406734793	13.7588573572106	13.1638856221042	13.1259368841229	11.8761520770027	11.9061697600799	12.5280946593491	12.4784399550629
CDC25B	12.8117670792876	12.8075857955731	11.5035551506672	11.0945547441846	11.8421066590286	13.048407463297	12.2457402102598	12.1519041237418	10.8426720458247	11.560506634578	11.6594375296237	11.6969075962197
UNC119	11.8815221798751	12.0937164585157	15.1193654891676	12.3728995489247	10.8957843398719	12.2539903570062	11.8713898779267	11.902098990604	10.9771556087839	11.1655990223995	11.1557133980686	11.728691631338
TSEN54	13.1989041822053	12.8967089521019	12.0062569548037	11.6129942775878	12.1162185560194	12.4364623210667	13.0430063576982	13.0414172212344	12.3668350765772	11.6613157027026	12.4940025781236	11.6903003380438
UBQLN2	12.3798519560607	12.5494664112785	11.9880122618919	12.6167490929524	11.8984167249799	12.297883828332	12.4262945154848	12.4269438997367	11.2901564293455	11.879033807084	11.9837561988088	11.852958905926
ATP6V1G1	11.4975078932759	11.9667455743151	12.384276901219	11.7511231960336	11.6196230505389	13.1962022743199	12.7888346937083	12.6328544607376	11.4704553812489	11.5695020164482	11.9809983087166	12.370604554342
RC3H1	12.4902638885001	12.669686012563	12.8693017610383	12.3770417376694	11.9485530396162	12.7473954129477	12.6638209740815	12.6469619023728	11.1417743008977	11.6703031731301	11.658574826074	12.0054571612469
RARA	13.1054556500536	13.1600272847553	13.6329776255464	13.1233811685981	11.828093129287	11.8911955096995	12.2274230942992	12.0536619171409	11.5620809883961	10.5907081077201	11.6046512256991	11.6631427786376
ABHD16A	12.7676709806342	12.8678917191409	13.2716035856304	12.5240265608639	11.8530032005098	12.1305221670395	12.3137660036572	12.2452061667837	10.9811133173652	11.0903646951883	11.7183037617578	11.4822953243033
UBTD1	12.4989083381194	12.5532422445764	13.3223627216002	12.8046003681835	11.9306628779434	12.7886899140095	12.5174010740645	12.6133826559659	11.4304911960346	11.4040818327117	11.8573773606109	12.1561586757638
ADAMTSL4	11.9700759097888	12.1594000357532	11.7887312182076	13.8571400829175	11.9020937219402	12.1045937139505	12.0103492950288	12.6273759383378	11.1863368314522	11.1630543641494	11.7679455770466	12.0077840321701
CD5	12.3003968492993	11.5296203605018	12.5223658165278	10.0196738782894	11.6282114942365	13.9706268523566	13.3557737069991	12.2253308770026	11.9999058276141	11.6619166125553	12.547797104923	12.1092535447348
OGDH	13.1312201751359	12.4901925059508	10.484506810762	13.6992575092962	13.0056982840426	10.3692014406505	10.8874910832466	10.167166770076	9.40739539312829	9.83604692636453	9.81494593793194	9.69146698490118
FGD2	12.8586655959009	12.9898133890085	9.48520069940618	13.6967741182623	12.6968026754369	10.8417317865561	12.1588173061847	11.6047547859963	10.4049	10.8714429800104	10.8798547685197	11.4545397193311
KIAA2026	12.7107918930505	12.4816583193532	12.1644998115137	12.4069983739608	12.2934615758027	12.1753155877188	12.7429510751723	12.4596244107274	11.5726111157661	11.7248095424723	12.0251736067799	11.6194682051549
RWDD1	12.4828590217832	12.2731128389911	11.7781524180129	11.7294916441843	11.688766080081	12.8270167721777	13.5544429225047	12.9352247490861	12.1910803790459	12.2470089358906	12.4219469311886	12.4098424438772
STAU1	12.4847943932028	12.5022749652258	13.3788549986991	12.1503012638629	11.539935722945	13.1252011584764	12.8074513398935	12.3229563273971	11.2728257064535	11.5371147732554	11.5229509786443	12.0081161362024
ZAP70	12.9868761096673	13.1275735454441	12.1980217147264	11.2667926235387	11.3200136261577	12.9920822478042	12.2038344371346	12.9299597900122	11.6312080560311	11.8934333550793	12.4234712826517	12.0561221616148
NISCH	13.0505450803231	12.9847893605215	12.8306628237293	12.5086630687068	11.8338799007375	12.5028101251986	12.4497301468554	12.2886598396626	11.4153607852428	11.3918179416401	12.0481921008746	11.8090339316393
CSNK1G2	13.0629053238756	13.0928171913557	14.0844805193584	12.5796533451989	11.3207987666615	12.2083203351584	11.3279489804832	11.5702723522225	10.8889068850641	10.9174625449581	11.1658678649839	11.201036785807
GSPT1	11.4497572326521	11.8532237284825	12.7016965146147	11.9792881731684	10.968730726062	13.618956585632	13.1923142629941	13.037597774608	11.5354144232648	12.1554566307906	12.5508998803858	12.5528286964301
TNFRSF25	12.2443789875016	12.1732064608425	12.8925375173338	10.1102249287739	11.2384289293442	13.3693780096995	13.0125756489354	12.8377357453698	12.2983826134204	12.1110405310778	12.1213977357344	12.3977265348136
MCM7	12.9687823926029	13.2069953398249	13.159305164626	12.2290741838906	12.1655652765571	12.3603746846722	12.7755616387726	12.0977617342937	11.5098902936147	11.5707825049888	11.7998550634223	11.6350341770083
TPD52L2	13.0071042062995	13.2302955403379	14.314282218794	12.4642230922151	11.2409199152714	12.202721458613	11.5973960856324	12.0048889345554	10.6827334638419	10.9905644434459	11.0252601005055	11.5748785340988
WDR83OS	12.8425308789977	12.9667831070306	12.9331554351274	12.6224700136163	11.7760858181131	12.5258138424237	12.4273750853397	12.1742019466908	11.2676504393379	11.3529002596488	11.4714825875213	11.8840518342396
OTUD5	13.1465831433476	12.9581507646586	14.1323520924406	12.2315718351135	11.5151108895962	12.5930850368113	12.0326335171159	12.1348443886666	11.2335509649747	11.3914556559198	11.6218674049717	11.4440228217676
CSNK2B	12.526415484835	12.763285205511	13.5710507348246	12.6934902072621	11.4588017309333	12.3121612509115	12.0429430427871	12.048053436036	10.5137972699276	10.9083753195888	11.0009625481512	11.4712570775444
MRPL55	13.119330101789	13.2106339969801	13.6088532961224	12.1758153213532	12.0957221464076	12.286397089683	12.8809575664657	12.1930046051552	11.6758442333252	11.5999243488426	11.711664803068	11.8499977130171
EIF3C|EIF3CL	11.7007288940252	12.7567504613972	11.5798486594943	12.7767955234571	11.0102073730461	12.912797147466	12.417620697195	12.4143922092207	10.6007367092624	11.2897625879384	11.7993333297163	12.7384108569003
ARMCX6	13.1588578213082	12.6764878062828	12.3045107352213	12.2577436129162	12.4582667811643	12.5857293604981	12.8246596392015	12.0625603115338	11.636236379128	11.3841907723047	11.2434786146955	11.7128871413254
GAB2	13.1588578213082	13.1162850875183	13.7954218389964	13.3057000914633	11.6483673554489	12.195591501299	12.291897320566	12.0083275752528	11.2228945805974	10.8239069625987	11.3463502195698	11.5820347594588
SUMO4	12.131552694423	12.3790246470772	11.4925964517785	11.7482188979682	11.9065460843618	12.802306384197	12.1614173023579	12.1429729209811	10.8295616357147	11.3491740031181	11.2820800594381	11.6603986927343
SSR2	11.7331119493501	12.4121695841884	13.2999822043833	11.7528629730307	10.8267116797595	13.2106702145872	11.9422180472348	12.381743619461	10.9636176053176	11.255136591993	11.9068934490611	12.0658855888756
CCDC60	10.6963454315222	11.2244351757132	12.2635741948315	12.5069458706238	13.1291627494532	12.4693099487841	13.0263947988396	13.7569185686222	12.3378068920789	12.191487936081	12.7632197315546	12.7578946555813
PRR25	10.1161713980921	9.69788771403861	15.2265705192794	13.8353423324599	10.1422132395801	11.6480354034717	10.863968640434	11.6152483730492	11.1690930429053	12.0122	11.2583602007996	9.86650990465532
PARP6	12.4063013826272	12.5791036647492	14.1458384288785	11.5943555837418	10.7886258920413	12.9238383764348	12.7599613201409	12.7033055596762	11.6016930353548	11.6024308217084	12.1490974540994	12.0842717645423
STAT2	12.999453158454	12.5813242964309	12.4600284038564	13.3125975538678	12.581149025609	11.7006244020635	12.0306033735099	11.0464106428906	10.4072300911396	10.3679688537767	11.012712461675	10.6901375008788
MYO1G	12.7979529153523	12.5207510672864	12.4741886213656	13.0882123553314	11.768336317184	12.3232611917411	12.0844387617759	12.5255745864101	11.5747079498024	11.7250970917646	12.0065358719484	12.3920119851115
POLR2G	12.9788878898552	12.888721886429	12.5348307137721	12.7987172115323	12.3221718903126	12.4474948375708	12.584809331633	12.052753913514	11.5663022669462	11.2882065777976	11.4675474147203	11.717362375689
CREG1	12.1076792888387	12.1307780417946	13.4114786024815	12.8974437140409	11.9398912371973	11.8516217800299	12.3282182058822	12.4200363840946	11.3458527992095	11.3288842027739	11.4848473463767	12.3163912629182
NAGK	12.3702869725837	12.7044657802266	12.7638719875005	13.472478003182	11.4975105128983	11.3142826939855	9.97174541080019	10.9925029921217	8.86204955050189	9.7695768024386	9.49363398815984	10.8461415056788
GSDMD	13.2765538389404	12.9248452475507	12.7862169791431	12.9426064181398	12.6564760340215	11.7560131677793	12.2659001744237	11.8575588199161	10.8719551514267	10.9234890515306	11.2681966560232	11.1332337037288
GALR1	11.7626586284127	11.757492804602	11.7591818539698	12.9836843239084	12.4350680663412	12.9821951048716	12.5944619263729	12.8498962919294	11.7930432012142	11.8357513105245	12.0895329725764	12.4754407659433
CPT1A	13.3180328844996	12.972434240311	10.4922944233723	13.3237604552671	13.050406783981	11.208905295743	12.1011729068524	11.1724181323474	10.8565263985854	11.3713885278584	10.9576653816257	11.9183811438266
PECAM1	12.800286067383	12.6853237585009	12.3373086774627	13.5353206521333	11.7383851029033	12.2281407952041	10.4842759689145	11.0948519642092	10.0438665867305	9.95064705995494	10.4226522408827	10.769855497118
TROVE2	12.2882581897843	12.2127047514251	12.2816621318552	11.3403781374165	11.5116767166024	13.386059385691	12.6913	12.8520726063889	11.8616273496228	12.2724150815169	12.4357763136134	12.3442787303096
CNPPD1	12.5886298712455	12.7796226669215	13.0250494735792	12.4770855840965	11.3426109907676	12.8385382696895	12.3555605575099	12.5764782587904	11.189076810713	11.3823688209696	11.8658735464094	11.6944334190798
ZC3H18	12.0069055390965	12.014857175984	12.9026779676255	12.6186585883561	12.4570174624427	12.7021229929314	13.0096928054109	12.9380959172551	12.0803262386098	12.0911003383595	12.1619389106162	12.0878896278875
FOXN3	12.2352107776798	12.5710809697417	12.144665313231	12.3243894251862	11.6361184267182	12.6250566084495	12.7282453023206	12.835097663946	11.8100524028477	11.5592169893409	12.2102302076466	12.0496838570922
ESYT1	12.9408566563913	13.0194864255889	11.9177040233927	12.3852906064958	12.5909455445593	11.6053271908704	11.0050593455119	10.773746217013	9.65935179826384	10.1035643045848	10.1073802203956	10.4255469066535
PLEKHM1	13.1318378450943	13.0570964303784	13.4751659243219	12.7779351549083	12.0514713661856	12.1041647509124	12.1491189449757	12.025090312509	11.3495313618261	11.0385535839307	11.6209819331483	11.4941983977162
TNIP1	11.3745085555324	11.9865406656621	15.5715638968228	11.0733616312694	9.65180272024835	12.5771000678411	10.3790655196097	11.3494719953433	9.97726696638002	10.2125821004981	10.4287370385493	10.9886
YWHAH	12.2211548095382	11.4970571785569	11.1212238758006	12.6300627885303	12.0208762850401	12.6718320603984	11.4704523505487	11.6307456085513	10.4489783075237	10.7186720684489	9.98792050923728	11.4958570185842
KIAA0430	12.2277184664767	12.6461190736615	13.3558293545237	12.5562652110716	11.3972305867167	13.163276269194	12.2009488193289	12.3815025713806	11.1361059419297	11.3543880712849	11.8343882854261	11.7542577878323
SNAP23	12.9216964965495	12.1285526493616	12.9754418946453	13.145182541709	12.737650462284	11.6963618978524	11.6491249213323	11.3316153710337	11.1196842461129	10.7478333925718	10.3389695444701	10.7831120242267
PRR15	12.0697155120156	11.979822808454	13.1951351923598	13.3013476037455	12.0934266880022	12.3499195846352	12.3996431925785	12.8358016241997	11.6327183939074	11.4226390127424	11.7925335644522	11.7894605107044
COMMD7	13.1670167835248	12.7402829185082	11.0491399073743	12.5402359353468	12.2810088876484	12.0539632879706	12.863271383609	12.4444732748575	11.8997609048105	11.8487410003154	11.8246789594039	11.8109386776227
UBXN6	12.6637306656176	12.5111543928229	14.1354117749188	12.5491074430485	11.667319800834	12.4367178710891	12.1563988212528	12.6623223991724	11.4557404624173	11.531864670239	11.2794636966583	12.0346027977281
MATK	13.4980917535989	13.437586814728	11.5096430664053	11.2422316840311	11.8435	11.861300176792	13.0367488432687	13.0568966131395	12.3160376506938	11.9716149091905	12.2527713433686	11.7933194239894
LAT	13.2404485925105	12.5923764716198	12.2210515763058	11.8468152408453	12.271293731832	12.3810602919387	12.2511554294621	11.3246109985762	11.0015201882212	11.1605052096415	11.3531202903642	11.3884720022946
EXOSC6	12.5370244680779	12.5415808801945	11.1563672497394	10.9664624775549	11.9910987402902	12.7544515562207	13.3790974907643	13.164344404731	12.5439638798772	12.7023915936157	12.3792960915746	12.5874661608141
STX4	12.5311055382016	12.7450448738035	14.1593527238129	12.708958073699	11.3591386527659	12.2555363577989	11.739396969359	12.0682625586864	10.931253233471	10.9620594268769	11.2183296804968	11.4712570775444
UNC5B	11.6587718189855	11.6560793684054	12.945735708795	13.1987123235263	12.5078897972154	12.7209904286489	12.879830317549	13.126656174818	11.7200882767339	11.5469075159294	12.1182636608275	12.0170541668611
FPGS	12.4896214937203	12.0430582994952	12.366379115967	12.934580773364	12.9164491196617	12.7141197259203	12.4313815590114	13.0290053420343	12.3577312238782	11.5143359647553	11.9175097316778	12.3411187392958
YTHDC1	12.0688556427834	12.3548251833902	12.9415939636132	11.1977917572789	11.0897461589378	13.5163394575711	12.8562962335448	12.9863683671915	11.4727059529425	12.0668025132471	11.9203915742845	12.4650756785294
SLC7A6	12.3149747497405	12.6795312727064	12.3767588101643	12.0229581651106	11.9667257881815	12.7846801723772	12.5495152654535	12.270680389379	11.1999849856657	11.5016358183804	11.4329853184683	11.7479085976644
GTF2B	12.1428322509022	12.3745927508595	12.8112076814555	12.1636597487466	10.8311269716741	12.9766988639449	13.170722889648	13.1038244485276	11.8478221300423	11.780101671189	12.3514507339117	12.2284859699619
LRRC59	13.380698463861	13.4769215528651	12.657070885322	12.007252773068	11.4954256927976	12.3017236838808	12.5789866225345	12.3871565786798	11.5626093239933	11.3581009017298	11.3948146424717	11.8538830335616
UBR4	12.1257763198049	12.446033096414	14.069700705057	12.0985625365306	11.1395460490779	13.1337378831198	11.7443603418674	12.3966104815819	10.8198710442324	10.9354670636591	11.733676877914	11.7875271764714
DYNC1LI2	12.7318590412375	12.7964145240979	12.8402293228134	12.447668749843	11.4527257105008	13.1115004816495	12.6119470824021	12.6455573499337	11.4083236361056	11.4816929164847	12.2765825129906	11.8588631195728
FBP1	12.331200717522	12.5443153673552	13.2546289078621	13.3534949605117	11.8308516298218	12.3470220354367	12.4603267022526	12.1258066149201	11.3750219749572	11.3044615812227	11.3612733589757	11.9007821263894
DOCK11	12.3369262521636	12.3433567773962	12.562527624806	12.884540615084	12.1168967798801	12.1476912496965	12.2751897466607	11.9287386581205	10.9921374875553	11.2535427635324	11.5986666536116	11.4758265952588
XPO7	13.1396388623725	12.7480790258969	12.0795994255266	12.5618998071594	12.1594335937128	12.6309499291096	12.1374696544725	11.8464238905501	10.8092247194859	11.0669620973136	11.060520619405	11.402940415004
ARF1	11.642970685809	12.2798739124093	12.877377796557	11.3170484608658	10.226746790592	13.5537336995527	11.2619895283127	12.8253832165426	10.2742072702559	11.1059053705097	11.7199587384754	12.3392722100071
TMX2	13.2377732590429	13.0698049920451	11.886525553505	12.6200890531156	12.6744017829754	11.8411059617578	12.6301616863352	12.0117580398388	11.3702012172985	11.5517790725649	11.1791632477863	11.6054893668756
HEPACAM	11.4807965675163	11.5611647618205	13.4521418187377	13.5517375068961	12.1904791697081	12.3911171144221	12.4369106799004	13.0027599490589	11.5402509245148	11.5498324233469	11.8782777402935	11.8302247816942
2026-09-15	11.7417699369819	12.1406496612896	11.4769822469967	12.3441435279674	12.2797980649645	12.2646817710279	12.0599635412748	11.8121363108888	10.5430061135599	11.3341719835498	11.4003298179181	11.7079891825741
P2RY13	12.1761512525839	12.4867	12.8484692844427	13.7972110824198	11.3705584645345	11.966756289243	10.7570313813185	10.8302988094676	8.86204955050189	9.40483957293696	10.0240940520479	10.9344080683403
UBXN11	13.0539166956875	12.7796226669215	12.2153774957767	13.3705926995954	12.0150667664178	12.147379008546	12.0439	12.2925110718784	11.0811157856316	11.2475501744329	11.4044524074724	11.9408217690996
KNDC1	12.4553231318921	12.4357608947545	13.1108068789653	13.1865344089462	11.7398534952479	12.448171013702	11.9339868907401	12.2175195405117	11.1117638206345	11.2053025574153	11.3958503450217	11.7538617809406
RPL14	11.9622254061358	11.9028	11.6159399728982	11.6279233891872	12.1021300671568	12.8141572576044	13.485491912271	12.6623223991724	12.1037486689745	12.2088632768236	12.1113446368468	12.3123629662394
WSB1	12.3662681892233	12.7033787655773	13.2931254812046	13.1123556796265	11.667319800834	12.209018669379	11.7107749712419	11.3130294743945	10.5354900490307	10.5697272758486	11.0661699252891	10.6785001627666
CD44	10.7019023227107	11.6121563096139	11.0552863927378	11.8010242473531	10.5164820015136	13.0549145272907	11.0046457135088	11.4604450745204	9.23515690077873	10.6262442127648	11.0778328853317	11.9203234038128
RAB6A|WTH3DI|RAB6C	12.2830774389832	12.1925098377435	12.1047941367353	12.4415688912961	12.421955876443	12.1798008023605	12.3316850850765	11.9454682368854	11.5191746384499	11.5514548132995	11.5609977246949	11.5244623269165
NFKBIE	13.5267889227775	13.8398066802844	14.3877082026019	11.1100215206513	9.37925194678753	12.0795005947178	12.0230669047283	12.6381104846185	11.2984271791419	10.8698834242177	11.7344958327948	11.4953833213823
STK10	12.4659761459813	12.6046552136822	13.9326149612653	12.889030285648	11.2371818219509	12.5929321754299	11.7448557413282	12.0763271764722	11.4030231564708	11.4062352676765	11.5616131579458	11.8665759111814
SRSF5	12.4218740275978	12.7042	11.866940820264	11.9082106991209	11.825605961384	12.5454579463439	12.8650953619905	13.1143791907421	11.421198967745	11.6306396081038	12.2846194282846	12.0720933309005
NPEPL1|STX16-NPEPL1	12.5399748516496	12.7233571430023	13.2150768722102	12.6706633605696	11.5597	12.4713902755746	12.4595723810992	12.5561182303588	11.563137466654	11.5351482228232	12.3722972799984	12.0736807666548
GP9	13.7023453806066	11.2172182071133	11.8591824481811	11.9446946194065	13.4305287877207	12.5803421042857	11.6331580044498	11.5966784603993	12.1196338018708	10.5862830535372	10.5284351758786	11.1984198959795
ATP6V1A	12.0278525433138	12.4732327950707	13.4578702439548	13.3145622154388	11.5321601935283	11.6752916260228	11.3606395625326	11.4597602169989	10.0070744628597	10.2027045545723	10.894584352134	10.9882575723322
SURF4	12.7582343834921	12.6414442710375	12.8154819271081	12.2280322181886	11.9777197088468	12.7134167903782	12.6224991075532	12.6838883534022	11.2121588979547	11.3281272207627	11.4153887316298	11.8695033056958
C7orf50	12.5641261403398	13.039	13.8821359499898	11.9940739286382	11.345700275408	12.2910216113082	12.471145420213	12.1486499303213	11.1059760760432	11.2334699007042	11.6898747362459	12.0825382699555
DPP8	12.7094132008704	12.449603053702	12.2991561760415	12.4519590568006	12.2103169414856	12.753836374191	12.7871521622378	12.3422828400981	11.3592952523123	11.7982535034501	11.8315844046617	12.035254700046
CERK	12.2192186254075	12.362936856757	14.7726517361316	11.9196145411633	11.3694205426007	12.450788207531	11.4459832868497	11.6111423329616	10.3224225209311	10.5135715781063	10.9033504528453	11.0023287918553
TAX1BP3|P2RX5-TAX1BP3	13.2021427260122	12.4985198468763	11.9702311108915	13.070184860155	12.4905495022124	12.3705762300128	12.0495748680621	11.737817417353	11.6068251040124	10.9761407545288	10.7829037002931	11.3028131383988
ZMAT2	12.8221372634314	12.8021379127739	12.7244667371024	13.0220627796193	12.0208762850401	12.3569580759194	11.8650237373218	11.4276666266889	11.2414919141853	11.0894715797973	11.5000171436503	11.128048221841
KLLN	11.4801499426259	11.6789325733449	12.8706716567144	13.1342118026995	12.1660022580735	12.2306975689401	12.4514004827541	13.0503154087891	11.7790171929374	11.5675791506136	12.2007794165896	12.2437959101612
ZNF28	12.5226524334133	12.446033096414	11.9884712025207	11.8074561849076	12.9467740743407	12.4304866043551	13.2327862976912	12.7158836346478	12.0208196419286	12.0448554518429	12.0001937353702	11.904889973024
OSTC|OSTCP1	12.4510398024933	12.4670013029093	11.5058010571339	12.4214731764699	12.4090926320782	12.210015703902	12.3746	12.216168473408	11.1670098693508	11.4500347575948	11.193925924422	11.7181745654484
LAMP2	12.5379568201806	12.4663606509565	13.3430561822176	13.1611017035674	12.3940634549814	11.6635486177102	11.8213014578386	11.4781381986119	10.416612434951	10.662728467276	10.7258426972132	10.9685974651374
AQP9	11.9689240998177	12.811878906988	14.7464694314626	12.5447621989293	10.0860560331099	10.5813125248784	6.98740380827634	10.1760888817844	8.42409961796677	7.69298600654429	9.43034703139135	8.37681565215679
RAD21	10.7402125605544	11.7187473606228	11.8823335095482	11.3083988296335	10.8355287920397	13.166412858835	12.5391277981639	12.9069482079586	10.3906627206127	11.4126763551538	11.9275710960365	12.2835711596839
BNIP1	11.7613286438291	11.9489699422916	12.5729696681983	12.2671072356539	12.7455661026908	12.9485407399094	13.2067708152421	13.311096369794	12.4437044887887	12.1910716760802	12.3317424276847	12.5974324599623
CREBBP	11.7301237252381	12.333905249719	12.4299330832356	12.0510397824832	10.9737314080544	13.4036398841461	12.445469635536	12.8483273104167	10.9106504947711	11.3113723344231	12.0835	11.9853570893769
ERP29	12.1833197108817	12.3716875938242	11.2338953028392	12.2244838955367	11.618026971856	12.4607909903802	12.779798144206	12.8248514516042	11.5169954557539	11.5259353765563	12.1184728110608	12.2211994089192
DAP3	12.446578228417	12.6062554332355	11.7839803551807	12.2874557402292	11.9020937219402	12.5095473928195	12.6913	12.3863158954813	11.4580140878328	11.5066623982898	11.4806231290528	12.149249500752
LOC441081|LOC101060375|LOC100653060|LOC100653059|LOC100653058|LOC100653056	13.9674432926283	12.8722511706576	10.6444873606107	13.4875331559763	12.1187038194018	10.8843246861177	10.2178400958609	11.0797766113829	9.18113127860996	10.0225951430473	10.2863262811582	11.0633651450558
PARP4	12.2760165298277	12.2316786957385	12.5954385395057	12.7535221515238	11.8167278089065	12.4292884851065	11.9387580192172	11.8845156307844	10.4895523261508	11.004371593702	11.2865542443848	11.3277724289455
SP1	12.1245355104176	12.0005471598387	12.8247638307153	13.4227078313812	12.2246512606045	12.0486227952781	12.1547221074747	11.8320305035686	11.0573	11.2495504715468	11.2621513936781	11.4302104445105
ATP5D	12.7658151222466	12.8228064035774	12.2000045104366	12.3811720676238	11.6502426099285	12.7398904547963	12.3552361511756	12.4465487321959	11.6149986288641	11.6055578011265	11.7706096438381	12.2443598367802
CCT6P1|CCT6P3|CCT6A	12.0615259874908	12.2548650253996	11.7179869957091	12.2848526629907	11.8175624604795	12.552785541213	12.6393833152397	12.5648488355396	11.2094624476337	11.448294139401	11.9323376711419	11.9292944178558
RAB37	13.1166282750909	12.9206420873345	11.7135522512281	13.0310519739872	12.2079847126943	12.1600226154101	11.5747255203274	11.9323634434151	11.4743915804607	10.9561922276832	11.307252241384	11.2593933736019
HK2	12.115195267622	12.2350676616317	14.6795846680143	13.337738615927	11.4733512352852	12.6174868758861	11.0646084592165	10.7571195441212	9.61113295479376	9.26470637137563	9.52426594039257	10.8081212774211
IDH3B	12.9543052066651	13.0124817990913	12.4309464411948	12.3882785399513	11.5416205244776	12.7502083051024	12.658177683475	12.4723563058783	11.3507554681542	11.5678998063604	11.750508187908	11.9350696064225
NAP1L1	12.1566570589398	11.6271374960695	10.722150600257	12.4957339845413	12.274134083292	12.5322056387574	12.6572569155389	12.5095605512641	11.5975741953999	11.3994049994608	11.9030135315926	11.9833315936816
CCNK	12.3392457756529	12.9321714403801	13.5167239409398	11.4810182202593	10.4964682038079	13.2788688529975	12.3908071546311	12.5041458896074	10.8127822311724	11.424056650329	11.7320375721771	11.976219880371
C6orf106	12.8781847609458	12.6561259193477	12.5043469761339	12.5452642417545	12.6193041023257	12.3164263283467	12.8558376664681	12.1404109604059	12.061759150184	11.8595207670148	11.9678258485711	11.767657748404
AKAP17A	12.344051364254	12.7718659928616	13.3703404249855	11.618412019796	11.1198318927626	12.9314749520447	12.4099880904034	12.516163190725	10.9755694802133	11.3830978778518	11.485820411552	12.0866322692256
DDOST	12.4734679498853	12.4955400975978	11.284854143241	12.3828583457974	12.2250707097992	12.1691768264524	12.6683981095202	12.9070319459351	11.6149986288641	11.7591935031055	11.7279311390585	12.1840571713444
ZNF622	12.7355211430584	12.3836126357729	11.784244702874	12.4913984129456	11.9979874754752	12.4929316128323	13.361276671803	12.5973854464622	12.0840111532838	12.0986657282104	12.1245250166874	12.1507543128519
CD36	12.0430372566169	12.2031233738441	9.73427796767861	13.1753343491052	11.7360325621413	11.7147424744265	11.7532516078976	11.7541082497862	9.02426965457102	10.7238612032008	10.8388092925216	11.6832468112434
PET100	12.3618872118003	12.6627121917078	13.4349029806725	12.1727860163209	11.6933205252731	12.7359502423125	12.6587035729818	12.4236698798431	11.9413882322156	11.6833843386294	11.9524217382016	12.0689132103409
NAPSB|NAPSA	12.6029566086872	12.9983696858056	10.665877570577	13.3688920144318	11.6574085875128	12.0162	11.2829489571707	11.3008444549201	9.8549230767244	10.6433850783417	11.1943228272117	11.8431265857895
PRKCH	12.3539677704783	12.3381135748541	12.1647028774037	10.7924362546508	11.4754681766232	13.2093745238157	12.5991271291585	12.9249236783074	11.8905320294468	11.8031646216177	12.3000070604278	11.7696178753598
CNOT8	11.3524192402938	11.1636879660428	12.1405415965642	12.0939944758688	11.8981537231427	12.9771088808263	13.169431835273	12.7137789330433	11.7867257551503	12.2389768783736	12.3201506531151	12.5333483365756
MGAT4B	12.7754659733822	12.1767354312252	13.5389827537584	12.5107210117547	12.0415037004002	12.7672424166802	12.0234752895495	11.6592623072934	11.2328872422529	10.8961692891588	11.1351874984825	11.5638513053738
ATP6V1B2	12.396225379293	12.6760722902798	13.6813267763394	13.373893857826	11.3223677669679	11.5635019481501	11.0389838700258	11.3479923558989	9.75491166259468	10.067734762318	10.1684509852957	11.0277748967567
SH3GL1	12.9801461143899	12.9468279778055	14.3811695217026	12.0718641642076	11.3014387409664	12.0572910849659	12.167896866773	12.0020693922062	11.4339604096751	11.1036954970789	11.2526546660027	11.5918169661444
DENND1C	12.9791167394905	13.0749623031766	12.8056191411392	12.281039696646	11.779231126662	12.3630663034366	12.5037087003265	12.2355028178142	11.4047921476792	11.5150013067502	11.8138710242388	11.741331597192
FAM8A1	12.7138203859791	12.9567830293601	13.4952470773526	12.4267504808221	11.3640983403406	12.4175112212487	12.282	11.9954689513113	11.0633057966016	10.9708157276044	11.7906973692622	11.3833607816359
ERH	11.7095828164217	11.9259	11.2630179071457	11.8977647618795	11.7392663175592	12.7522630495692	12.5678303116899	12.4035120952403	11.0700103345116	11.4844132486446	11.5486336018348	11.7807400302363
CHMP4A	12.9240757625599	12.9901477029561	11.6741554824849	12.8388582943092	12.1883297427842	11.8189269048585	12.5886781227571	11.7518721453619	11.1924944835927	11.0053189580913	11.1855656541787	11.2275184348709
LAMTOR4	12.9512756137549	13.2117811426341	12.9742838536264	12.6363597180498	11.4433831927569	12.1178286958686	11.5511266263146	11.9552192994131	10.6562457800995	10.7885743789596	10.8337229055642	11.7104402405239
SF3A2	12.8876023988701	13.0608146723889	12.5603683785319	12.2192498685589	11.7251018808978	12.6177122928718	12.8520489149691	12.3841518866619	11.7379742802679	11.6093012521075	12.1119750119295	11.851479069023
RNPS1	12.0880798148168	12.5985289055043	12.1388888040609	11.4235590310698	10.6093772465263	13.4040320113885	12.1115820471309	13.0264638516211	11.0752035182668	11.5485331965834	11.9828374878888	12.3037314882603
UBAP1	12.5793009954724	12.6104657055408	13.5349040329396	12.4339979895508	11.3499372692064	12.5233293884953	12.5378419573439	12.4377653069356	11.6392449819821	11.5582489979444	11.6887483761282	11.8444290412823
MRPL41	12.4416046878713	12.6434293709138	11.7298382605872	12.1178170301267	11.7107969976166	12.7565002706481	12.4866306071043	12.4911342111655	11.3347604964683	11.6528765802223	11.7935817702913	11.9449908018096
CT45A5|LOC101060211|LOC101060208	12.0727210253301	12.0484189584443	12.8255346338934	11.9979913376681	12.3022342104863	13.1564654602302	12.8575565424948	12.6921726191834	12.1253671217076	12.4010789951158	12.0545457736731	12.4923938806192
GPR56	13.4658757399445	13.6177920879577	11.0287579300167	12.0653450228018	12.1116888967224	11.2267487271824	11.4275866777055	11.6632338371884	10.8922734606041	10.8206815048832	11.3858072693369	9.96969367403511
SARS	12.6591675309907	12.5640617547361	13.2600559563099	12.2542677053056	12.0073	12.8274716070884	12.001462713512	11.9668342389568	10.8753614699932	11.0934862515436	11.1351874984825	11.5554684106925
C1orf210	11.0067326332954	10.9494	12.4356660560212	13.806943469883	12.2627389703335	12.3682559035349	12.4068610987951	12.9752297691534	11.384615432148	11.0574023744821	11.8328595717127	11.7189862978011
REG3G	10.8583781588615	10.7526847563581	12.4634989782432	13.8200031122685	12.6027756303559	11.8706618995652	12.7471606617953	13.1125649077933	12.2181604325423	12.2284679010362	12.3439574835488	12.1662
COMMD9	12.6723893629893	12.639740580055	11.5340554482796	12.8187889421627	11.9777197088468	12.3295134556655	12.8648674907398	12.3645283366285	11.1979459754268	11.4607799686707	11.5045051454835	12.1212770836753
DYNC1H1	12.6022139261939	12.4489546272559	12.5699063165095	12.3292561983652	11.7471731216563	12.7699	12.5827324893665	12.3597640151978	11.1233	11.4796492956237	11.7265597267673	11.899529586947
RPS2P32|RPS2	11.1759974868633	11.7697474600028	11.7102172242553	11.222695905239	10.8464749405412	13.4951064708878	12.3904905789897	12.6741792674977	11.2766950103602	11.7544118954611	12.0652181133808	12.9591264664472
OR8U1|OR8U9|OR8U8	10.5004539495348	10.8793681525588	12.7602483263443	14.0150453684355	11.5449842359121	12.6131218799085	11.0870533726827	13.2182493026531	11.0855341398809	11.0119331456254	11.6765841369576	12.1463860270694
FCGR1B|FCGR1A|FCGR1C	11.9833701345296	12.0546124708264	12.3846256282026	13.8259380220828	11.2187659657021	10.3264449566853	11.1471285733121	11.2005654603041	9.64744733205142	9.56761450021634	10.0312211805982	10.1964433844538
PSMB8	12.7728283190225	12.9555281317723	13.0855033758778	12.9142543556405	11.5476695700252	12.2096169727741	11.6643934295947	11.7704012972836	10.9296157983514	10.8817971590037	11.2828267215663	11.3101039749566
FOXO3|FOXO3B	12.3641669803737	12.6839467030885	13.8355135310083	11.9896540913417	11.0121530175704	12.6492956040554	12.1554675540123	12.3161619449098	10.8198710442324	11.2310422808355	11.2902721611349	11.9206762612678
G6PD	13.2229695821385	13.3132415330054	11.7594507843885	13.3736111966173	11.9657221738609	11.1986951873824	11.5935506335577	11.6018607915746	10.6171062614431	10.5754796479281	11.1703132871248	11.1579875467877
ADM5	11.0921543212152	11.0735964346253	12.6026512283896	13.5922234400502	11.7874905829887	12.2293214076675	12.6904256594572	13.386064229048	11.7876299430175	11.4827136421184	12.0492895598263	11.9301709338515
APOBEC3A|APOBEC3B|APOBEC3A_B	12.2967292413276	12.5485587390005	13.0597481385615	13.5843469181462	12.0407890821215	11.4171541109947	11.0697582993119	11.2615652591293	10.6109894250169	10.5432278268432	10.843877809821	10.0525266277451
NBPF14|LOC101060684|LOC101060362	10.6941166670779	11.9642519808149	13.0527431922826	11.1492997842173	9.75765	13.2444914320185	10.9946828018972	12.0846431382811	9.42841811616206	10.7227096738584	10.8499366193353	12.1135812249616
PIK3AP1	12.6326456737435	12.8315389462086	12.7525683542654	13.363018708562	12.5169963413679	10.5686201933139	11.6288701453679	11.2613032694879	10.3520644159173	10.3985772081489	10.4933839100546	10.505819039245
TMEM205	12.9665912013914	12.7739385204547	14.3656197116932	12.4174567872652	11.8341548830142	11.2482618536815	11.6995742048204	11.9126471474178	10.3775107044714	10.622544523689	10.7411361128713	11.3200356546111
RAB20	11.6444143254304	12.5929635494448	14.8473564780038	11.4559606894436	10.3957406734793	12.5413445151411	12.5560225872515	12.743719323284	10.2135997665118	11.0943768851712	11.3913569203269	11.8059810973985
KIAA1551	13.0721601405838	12.6706596631239	11.199026656902	12.7076131053761	12.534192770123	10.9139962480187	11.1679654544464	10.7129714789234	10.665129152799	10.3723814357728	10.765914303905	10.2977182954832
SLC12A9	13.6483992588899	13.6670630299732	11.0411986079317	13.069254273033	11.8325042018256	11.1546329259936	10.8856952181154	10.8558575163386	9.66723388434764	10.0421138861537	10.0870050829164	10.5978340530797
VPS13B	12.6051823652048	12.8069533769123	12.6451861282393	11.5403114182706	12.3545454484648	12.7222488452075	12.4425713918947	11.6080551159649	11.9893	12.0084636728312	12.4006071411135	12.0422441112298
MARCKSL1	12.344051364254	13.1554638837482	13.0852888497818	12.3757250580528	11.6660846161923	12.4353544152127	12.8293386399282	12.5962433911566	11.2715336295244	11.3983235735486	11.1823680028728	12.5114945621847
TKT	12.5702152496793	12.7420043270915	13.2834335873675	13.0481557800633	11.4061361419317	11.9330978632171	11.8970229894044	12.3480923468376	10.4694079484068	10.6906769847464	11.3669180062295	12.1536091379954
HYPK|SERF2-C15ORF63	12.930480250348	12.8023917592747	12.2142007569649	12.6888021756308	12.5379	11.7034590909039	12.532687102439	11.8058626921355	11.2322	10.9766238748119	11.4252286713563	11.2340635870727
ARPP19	10.6256005610858	10.997594568715	12.6039996023835	13.0748288134356	12.3176557942282	12.8048823473862	12.4392082407512	13.0140775951637	11.6037480538022	11.6052454079076	12.2275913969345	12.2797251474395
LOC101060555|POLR3GL	12.8772027704383	12.7760080747885	11.3534440766355	12.2450261444308	12.5147679757069	11.6873694358283	12.4628884475476	11.8162441697348	11.2863231093734	11.2729468742076	11.1743427277978	11.4336759562108
HMCN2	12.5475560063929	12.5798442552367	13.1926478836839	13.1942376740771	12.1395462255785	12.2947857721071	11.9839433600657	12.1848776473143	10.9652169212938	11.0646917118401	11.4201474269855	11.5887116344924
SPEN	12.3207649130844	12.7050089803557	13.3027527000213	12.1035707534926	11.5676518190572	12.8534182488274	12.3560470302778	12.1925924727242	10.8787597656757	11.3141	11.3648038506233	11.8662095688077
RELB	12.0441314125747	12.4204622268101	14.0336878177711	11.5193409050025	10.4068755029085	13.0102825819021	12.6093649850227	12.8941631882087	11.6180518014361	12.0769763848019	11.9368513769373	12.3163912629182
SMYD1	11.3657833878096	11.6510139859231	12.7544584542955	13.4889256814938	11.9252522815602	12.2445820946231	11.8388104721208	12.6324493570226	11.4827903020035	12.0726894982415	12.080113896015	12.1700269601862
GYG1	12.3363904474761	12.4096724678418	11.6324784998808	12.9318956064087	11.5120205017976	12.5567097788113	12.1695583475101	12.1962974318262	10.8110045718781	11.1588032677353	11.2587397686645	11.7631393237559
C2orf29	12.4457504948448	12.677318479438	11.5515539859242	11.429372768732	12.6965002235597	12.6264761897007	12.592536567144	12.6516672100022	12.3737759981256	12.2092744353693	12.0035947755598	12.6737309368003
HLA-DRB5	14.8540035397189	15.1814351436771	8.35040023053672	10.2726455903895	8.87775577214151	10.7171096975755	10.1911877419507	10.8792650512595	9.10192641815386	9.42196877601997	7.88365654294953	10.2423342596536
ATP6AP2	11.516552686518	11.7967545645419	11.1762440532702	11.2180852453641	11.3987186689772	12.8175627976261	11.939623804582	12.7140661187625	10.8804559164419	11.8918974028492	11.221838098767	12.4823893619574
CD8A	12.8786755056611	12.6868370026888	11.6090920537647	9.57656990505124	11.9350280714382	13.1476463259099	12.0356733857212	11.6727211388274	10.590410610247	10.8730008525101	11.8470649640806	11.7900400060412
FLYWCH1	12.3463594692942	12.0209780168138	12.1056405322098	12.038969821112	12.8667780927006	12.1044864853116	13.1769773424417	12.6027720486226	12.0482413204322	12.0213991353811	11.9986038352533	11.8727895395771
CPLX3	11.2427081754935	11.3111920227224	12.9233477088235	13.8629244714016	11.4915956800398	11.9746390118146	11.8793082521629	12.6132800145695	11.0677789482528	11.3319081646159	11.5436581296456	11.6133691227929
CCZ1|CCZ1B	12.0271886990048	12.0681875463898	11.8212986891069	12.5522745574861	11.5047837494009	12.5218848365642	12.4678482997785	12.5571857712685	10.869395123952	11.371021074805	11.6094210734677	11.55
MXI1	11.4122845237961	11.9066213876432	13.9683013037542	12.2886555781378	10.7593868735919	13.3882631940962	12.8171415299413	12.0939416537736	11.1339745524591	11.6625172722218	11.6743096628989	11.8371574838893
DCAF17	12.3922783025633	12.8472485778389	13.1198420942713	12.5549362192624	11.6777763887318	12.3750279342818	12.2397774720011	12.2458683976202	11.2480761449012	11.3353025620196	11.4609648459591	11.4499021689988
TTC38	13.316131947633	13.3494786472134	12.4241772381389	12.2776195322573	11.9878891832704	11.5833355409847	12.2534202927381	12.3292190188781	12.0527613515177	11.2897625879384	12.0119498862978	10.840930814422
PPP1R14B|LIMK2	12.4186716816505	12.5437081515087	13.7622581273139	12.6795326194666	11.2842326295751	12.067448724778	12.1761852009225	12.1243668267097	11.3446245241856	11.2967439407566	11.4017053241573	12.2190492801784
IDH2	12.5523317541515	12.7717363609257	12.013490714578	12.0125876072149	11.8530032005098	12.3993571696085	12.5555990901769	12.4835175926663	11.0445169214979	11.3159611805424	11.7674121729292	11.6072441471399
SKP1	12.7072045494233	12.9448746893922	12.8938855366907	10.5249344879339	10.1234360240814	13.0534710473923	12.9635112999148	13.2987034749626	11.8607683827194	11.7731658950945	12.5018801263299	12.1794938723847
MGAT5	12.794836165109	12.5267551412479	12.4851249003705	12.1736521815229	12.3566525519633	12.4916202851759	12.7430750620362	12.4481609151844	11.4905852399985	11.6130350148556	11.9708406983196	12.1333534807757
CELF2	12.0220890525617	12.3098233814398	11.861188606206	11.9097710865239	11.7976783517944	13.0035130871886	12.6170974540423	12.4311424658729	10.8642614004448	11.6297183869685	11.6403378586998	12.0490384434089
PIAS1	12.0855313445686	12.5434044474778	12.8777494472761	12.0822800288563	11.2081967209475	13.025087255847	12.1937094220471	12.4493113723016	11.1204021330151	11.5617951284899	12.0576030782735	12.0800130988064
NCR3	11.4454573216066	11.8255152243799	12.3439590689422	12.5110637172882	12.6278944395353	12.8340829853212	12.488406710781	13.3450551954584	11.7694376319486	11.7334111977287	12.2324307843593	12.4619273307297
CYSTM1	12.8082937202408	12.5749493182814	14.257484623922	13.9074071748492	11.7280642954015	10.4668588049652	10.7111226660256	10.9537915514762	10.2349706371956	9.55989749502196	10.4660320354963	9.81884303869256
PPP1R15B	12.7180770462136	12.7497911628381	13.5695178334092	11.3488387020349	10.8659711219673	12.2662163629596	12.6261338237617	12.7860399134805	11.9010148260294	11.4126763551538	12.2015693513142	11.6584958785643
PATL1	12.293052285536	12.504148865496	13.7143015863182	11.7265434265479	10.791460821537	13.0310796818317	12.6736114013558	12.5389292601142	10.7913043756428	11.2375068779559	11.4058239905939	11.8006230437118
ATP2B4	12.6722478353617	12.6893098018142	10.6761700537122	12.5062584187801	12.3137172297357	10.8162925539902	11.4874258797153	11.0854113475027	9.86695075251471	10.8066205829541	10.9623337159707	10.3299560728228
OSM	14.210342439549	13.7541499998861	14.6117954249575	9.64811579878062	9.76343487299673	10.0562480914962	8.77466067002688	10.1377828421225	9.49636050921958	8.41728333747056	8.82460559459717	9.64780193298018
TRIP12	11.9475649975396	12.1470601640968	12.7713588381976	12.6566369725711	11.7110964675922	12.684440993167	12.1917122027923	12.2732812018876	10.8409308600422	11.1399481809214	11.7542817829091	11.4415660047087
PGLS	12.5098791781387	12.9275242031841	12.0347547118011	12.6844027633898	11.1954105635091	12.3046202194646	11.927018778502	12.3784860683486	10.7538567299965	10.9174625449581	11.4089052925843	11.9282418950131
SURF1	12.8883336654921	12.8792471404353	12.1121833144386	12.4379686545708	12.144432957716	11.8804643373809	12.3241	12.3527723512137	11.0505560260379	11.3654980196591	11.3116491549742	11.5304859084616
IRF6	10.3293510361033	10.4729147979794	12.3288164365991	13.7481208682153	12.1417695197427	12.0700868240001	11.769898166604	13.4769220412971	11.2818379916642	11.7010332715364	12.0749501801116	12.3286750322206
SLURP1	10.1555821060841	10.6253217096562	11.2362159505361	11.5839681468812	12.7307253943516	13.2782510648644	13.149832565541	13.3692654609861	12.7243113459581	12.5976171470932	12.4342649148792	12.5112602863903
RAB21	12.1224651204299	12.4056680698653	13.7465395218952	11.8171892242367	11.2217115308276	12.7887566488244	12.388906656589	12.7549282681586	11.2766950103602	11.7667553972539	11.5980668288445	11.9536377836835
CHTOP	13.3039428254039	12.9194723663812	12.249666419638	12.6526042576234	12.0097207445943	11.9221883806047	11.6918871535078	11.2499924737116	10.5684822001099	10.5373451463126	10.5876464669829	10.8330793182938
ABCD4	9.85998442966285	9.97420188846719	12.6135518663177	13.4071411204986	12.2880518380694	12.4950599815525	12.0483713471623	13.394868593776	11.7267036833242	11.9318085008117	12.1886790079303	12.110646001212
SMAD3	12.0980182028775	12.2195641534644	13.236969379815	11.6779233185397	11.6113040922657	12.8912661621969	12.227777548695	12.2912284698691	10.9652169212938	11.1160274154675	11.651654565518	11.4415660047087
IFI44L	10.5707755626673	11.9070935767862	12.2383270881757	12.6996672017536	12.377556035628	12.5346748669243	12.8335368049756	13.4796271804577	12.5128621859265	11.7673139641428	12.6665512796687	12.5420897297192
KIF5B	12.3297657761905	12.3332026671361	12.0486852149187	12.1671432329181	11.1198318927626	12.716647461341	12.8882632939652	12.8010773801187	11.5104380889129	11.5086681361351	12.2106226501801	12.0308486306244
PER1	12.0613098447488	12.955642258355	13.8081518342018	8.50328892815949	7.52126781679654	13.8477965476833	12.4199491596173	12.9961626741683	11.5705112301986	11.9177887686874	12.3357056861639	12.7305833095813
ALPK3	10.3939424095621	10.1456614438408	12.5662216879603	13.651637090805	12.1760164797556	12.2189581412454	12.9656380130369	13.4226634116557	12.1381843877423	11.4493387626142	12.3274064195288	12.0167241142108
TRIM28	12.4342790057439	12.6912301640105	12.9924730990784	12.3877187735109	11.5990586714725	12.6897397958579	12.060759580084	12.2611474347285	11.2702403937904	11.2488	11.5548289085334	12.0894597864358
C6orf62	11.6182051807244	12.0843525573444	12.2948952802135	11.861134376862	11.4157221924965	13.0453384161968	11.8177740099876	11.873073321468	10.1362056827137	10.7353262219442	11.4470429102775	11.689265215039
MOB2	13.316131947633	13.0678002474654	12.5575874475981	12.3921908349584	12.0343415382058	12.1554753906874	12.0242917125498	11.7861482221218	11.2135052349476	10.9473	10.975325255255	11.0990341611064
HOXB4	12.0129534288601	12.1198203005819	13.302937209843	12.9115310528978	12.052889713522	12.3119755264052	12.4045113992758	12.7969260457863	11.6522102438189	11.4144604543364	11.9636410126363	11.7898468665194
TNFRSF1A	12.6764876383535	12.5881129978928	13.2524332522077	13.562524093187	11.9893714048302	11.1772401610988	10.2710880302014	10.4091478735285	9.5095732947313	9.06837258131201	10.0506411565776	9.70709751893202
SCAND1	13.1770263431623	13.0612390048186	13.1015025927298	12.1385934321867	11.7925934603493	12.1523667725078	12.3227533646771	12.2288188284536	11.4000700088668	11.3063845583042	11.7216118193014	11.567235948125
KANSL2	12.3775968581525	12.7819415600942	11.9406535041423	11.4651872700393	11.0092335655743	12.8584503117802	13.303934888027	12.9901676036403	11.6422473237366	12.0008838670276	12.4648542179832	12.1360909820122
ERCC5|BIVM-ERCC5	12.5856271423664	12.4732327950707	12.4593663943854	11.8457287611565	11.9083754235512	12.9394921675576	12.7099669335048	12.1111982959932	11.534337439597	11.5637257132687	11.7909598259291	11.9717997579347
NOL12	11.9051	12.2138502522201	12.508032814344	12.4474897097583	12.136427846577	12.2536035981047	12.7065376503499	12.9920634763788	12.0474866030753	11.5885910189574	12.1550228018833	11.9851884064337
MLF2	12.6654381268203	12.9583785946504	14.2105074242289	11.8737146609094	10.967227135118	12.5157696205635	11.5669020350595	11.5883478146529	10.6332921582528	10.5168969823249	10.6020772190102	11.5652061152999
AKR1B1	12.8606542810229	12.6078538798113	10.9413806117805	12.4047869086523	12.4798686589742	12.2310905169739	12.6298935119356	12.129399811906	11.2467617008707	11.2607011669482	11.4845228449134	11.5069443599086
POMT1	10.8563863317652	11.0412673882683	12.3324362678076	13.5153876911434	11.6189848308507	12.2255794819543	11.5916240571932	12.9641654812311	10.8582488754603	11.1190939941851	10.936943331106	12.2392765450041
CXCR1	13.0175028755961	13.7774505713685	13.9956689231045	13.4915330480293	11.3164751974445	8.71839672478285	8.32516870540747	8.99331353277843	8.95834450689857	8.03481156361761	9.24813628312319	8.61172939539952
LIME1	13.4234532202014	12.9960411784456	11.843031954395	11.4545359635979	12.3901413087596	12.0487342572707	12.7859491513927	11.8787204277208	11.991297697557	11.7362670571289	11.7521266517424	11.7793787609515
DNAJA1	12.9333175887352	12.8974220592952	12.3065365872618	12.3138208280368	11.1346427076067	12.1998134782241	12.5579972646229	12.516712049072	11.2135052349476	11.3021506213929	11.7088895281715	11.5348719056348
CD68	11.886654826784	12.2029310956547	11.5468876495023	12.6960546105173	10.1738448638965	12.7633763017785	10.7272571404432	12.2335008706045	9.98359361245741	10.6032768413052	11.2998941412303	11.9077407228917
ZC3H4	12.8661090721802	12.8456483415817	12.2735882709047	12.8229356335174	12.5195632632072	11.382552362296	11.5114988954851	11.1091892370323	10.550483224207	10.7006541548334	10.4972493311039	10.9733675949637
EMILIN2	12.7459141458168	12.7441201682331	11.7456710130258	13.2868104571404	12.1252354303487	11.5597526017502	11.3799041595836	11.5271215236535	10.0812194014069	10.2657318801284	10.3911449317098	11.0287572774582
LGALS3	11.5594245031696	12.3300368046252	13.2133110354184	11.8541276523945	10.4520089159014	12.6248323363937	11.8600019874585	12.6721113373159	10.3124049867873	11.3454380978738	11.1735377389974	12.6649117184757
ETFB	12.9084197705077	12.8198001795122	13.4240867730252	12.4055244403852	12.0128821511011	11.7402261422236	12.3960206521257	11.8828135745485	11.273471311816	11.0872363700796	11.3391893399837	11.5246944685692
SH3BP2	12.1797399340546	13.0262398792597	13.5286853629847	12.1252235973199	11.1324083954659	12.8971589335456	12.430303987199	12.0147141630892	10.2309876384523	11.001525763618	11.3065181179529	11.6981430952134
SDR39U1	12.6910898972213	12.8240571506517	12.1814584808105	12.3173523031029	11.8432000240125	12.6855883304079	12.4741362775943	12.1844631863822	11.0452731932361	11.3947129558402	11.3591509098314	11.6940206433087
LSM10	12.7024999077332	12.7009299840278	13.183457482051	12.7104510139349	12.2795961624448	11.9435658545483	11.8885291225311	11.5216631224801	10.2243247727544	10.648851671231	10.7675155865438	11.1462673265604
TNFRSF10B	12.3301246454184	12.6597731045682	12.4552219387725	12.4839106152265	11.4828531050153	12.7576599185265	12.3241	12.1184486258668	10.8762117950376	11.279226803308	11.4463765981845	11.8548065696203
MKL1	12.5044836826766	12.6617331611291	13.1074304408513	13.1482703025572	11.3595207729098	12.102555003101	11.5907975931792	11.5675	10.5050279964646	10.9229878029277	11.0919607503388	11.5847092188224
MMP9	13.3861449748747	12.6537362262846	13.9700452292605	14.5513022957463	11.2124337150571	9.33043459640852	7.44310740405547	8.71280608076978	7.94913006485506	7.52347454020256	8.4200503158818	8.30511032891157
PPIB	11.1950368030351	12.0296772720737	11.7605260050346	11.9380830971673	10.924993922974	12.7500712180024	11.6970164027845	12.7645727378432	10.7154111040953	11.5206443576479	12.0060837857076	12.0727285148213
TM9SF2	11.629620982019	11.802857270998	11.7564897893986	11.9970129822758	11.2582	12.699924558252	11.9478229543625	12.0598513604226	10.4995200084397	11.0966010677145	11.1532656536537	11.7189862978011
NDUFA12	12.1162360634345	12.3560361992815	10.8754188258333	12.3002028549313	11.9432092464078	12.1453999118838	12.621420393741	12.1129417010729	11.0870039229553	11.2358934424834	11.2723381281656	11.6227249949741
PARP14	11.9552628359552	11.8637220175483	13.050657034253	12.7723709286631	11.7686240791317	12.048845710993	11.9719328975899	11.5843738427819	10.3124049867873	10.8179881025876	11.3452783510629	11.0611262823224
PGA3|PGA4|PGA5	9.99103619967757	11.3366540759255	11.5334265580361	13.5862997561721	12.2026701291886	12.4871857337862	12.4589686400791	13.139756257937	12.2127849336461	11.8787753619535	12.4021541958719	12.6665957312062
DECR1	12.3859059107728	12.6958832864415	11.3669204561576	13.1077178577562	11.8236685288191	11.6127346645359	11.772815959005	11.6624404054605	10.3323709764494	10.618835322625	10.7669820233939	11.1642592179549
HECTD1	11.8837241221913	11.9860937805501	11.9996698823438	11.7200360616017	11.412411147444	12.9671772006055	12.922386939921	12.7382702884378	11.5944773302132	11.9215574330309	11.849586987913	12.2832967842431
CMTM7	12.6200803839889	12.7480790258969	10.8872804517944	12.4220200003967	12.0938860720248	11.581795822724	12.1380355007849	11.6926768563358	10.2972470438255	10.7421617531493	10.9506344332158	11.3144071482645
GTPBP1	12.9945939701155	12.8140206813571	13.2869824093514	11.9763127503901	11.5860554709879	12.5396799916166	12.5908842114465	12.5098914017688	12.1381843877423	11.6102355988752	11.7144347494891	11.8055990384491
NDE1	13.1659114802445	13.0237382528161	12.9735885825676	12.8840114986347	12.6890702777112	11.5759298598843	11.6599348931381	11.509360840943	11.3568604679925	11.1647513013784	11.4316393282425	11.2809917830109
SHMT2	12.1483373811312	12.3212061147744	12.4764806755283	12.8175426070616	12.1069173988019	12.3820337487349	12.3035458108721	12.5360083179135	10.9803226440245	11.4293604176006	11.3767433062895	11.9164362658779
SHOC2	12.0338134358647	12.2233608872577	12.876510238593	12.2373829276687	11.8300246334095	12.7537680045296	12.2813497292946	12.1889	11.048294323341	11.4183777237321	11.442706370158	11.6127141178983
B4GALT3	13.0521774911655	12.8513027619668	13.3304404580723	11.9842336146537	11.744249725817	12.5752441992389	12.0431444557582	11.7790284662537	10.931253233471	11.2717663384083	11.2798377533954	11.2340635870727
HEBP2	11.775891469431	12.3243913934134	12.2718926594389	12.6165898540999	11.1466	12.4021515910238	12.8021057624178	12.1576869345377	11.497785878539	11.5239535176818	11.5932592306249	10.908312546725
VAPA	11.8205072682448	12.2648469793518	12.3734243420057	12.163223721263	11.5676518190572	12.4292884851065	12.3949163321157	12.5032599303861	11.0573	11.6207827883468	11.738311488264	12.0784
RIN3	12.3574928902972	12.8640055609899	13.068999308396	12.8570355882289	10.9707330792038	12.5917087011879	11.1328158977476	11.9611997667141	10.6160885883278	11.029268914289	11.007301312964	11.9116513286663
EDC4	12.9439081844362	12.9632682550274	13.3308929244736	11.9894081471927	11.4933378555896	12.8588317776629	12.2149620066356	12.0176642418907	11.2799115210347	11.4437586789127	11.4935813966966	11.6440373673697
MOAP1	12.3898704363364	12.4878269580842	11.8544066118995	10.8515453447276	11.0561935906448	12.5516848392622	13.3475612485634	13.0484186919282	11.9458502120108	11.835484993143	12.4213	12.3050835653804
RGCC	11.2784787178004	12.3468416893358	12.9836373643118	10.4054043831157	10.801620691313	12.7312355173568	13.0367488432687	12.8301603013458	12.1008415768168	11.5086681361351	11.5653002548606	12.1688392160346
CWF19L1	11.448435547173	11.5911529052945	12.4610208485747	11.5131951565654	11.0669968297515	13.1061549556691	13.2444820795308	13.0613427064089	11.8980873128556	12.3980164074494	12.2378316955631	12.414109211236
NUS1	11.7484980211244	11.6877536104094	12.632175046314	12.5989654090704	12.2512531361483	12.5753215749086	12.2288403893678	12.7309096748551	11.3223348578164	11.921306495086	11.9347150659972	12.0596510202153
AIP	12.8735143412544	12.6538769061434	12.3237333656468	11.9810210067572	11.6215360168777	12.7252506267507	12.4218092274772	12.058344186873	11.5153589061149	11.6822000309886	11.5956650323227	11.8392121493252
BSN	11.9370013103266	12.2065800048232	13.0364127862405	12.8032017909885	12.2898573387264	12.3703978757712	12.4993112961884	12.9007380733959	11.2882410425268	11.5246144400181	11.861131847185	11.8304125905533
MMP25	13.1541023677681	13.5356636198162	13.5601316991882	13.4488811982796	11.2635557370497	9.77884908999573	8.8223813113079	9.73018348774635	9.20569346984183	9.16140227363082	9.73644936662201	9.30379809670893
C1orf54	11.3357167922777	11.523166257873	12.8960886730734	13.4675422270148	11.868389936384	12.442752709098	12.1211536318853	12.8619551930248	11.3421648330658	11.4261804971738	11.6382972248696	11.8544372260596
FAM104A	12.3694142759645	12.2267694254208	12.6148900954375	12.0174203969969	11.5643406048795	12.7765598014398	12.4603267022526	12.4389240804847	11.2375269034897	11.3914556559198	11.8475697215989	11.509761568301
HMGB1	11.7850827655408	11.6314302392013	12.2963787585015	11.0527944206951	11.3964859701391	12.9962494032431	13.1837529907489	12.841420973868	11.687517608252	12.1871112056125	12.272265248496	12.5409425679616
RALGDS	12.6674276142657	12.5923764716198	14.7367022693097	10.4745132339709	10.9566578901862	12.2580450804145	11.6485955279669	11.5502529077031	11.0147087520869	10.7635963805458	10.8719370635919	10.6718078654368
RUFY1	12.750345472352	11.723580812462	11.7567592216453	12.5000565662011	12.1790505401891	11.657421810735	11.0780386341681	10.6808128769963	11.8684807348143	10.0929085644274	11.1458974048472	10.6776653220051
MRPS21	12.4161384831286	12.4499271575395	11.769633169269	12.456948342544	12.1189295405231	12.5399971918837	12.4524624179222	11.9408950872142	11.5757552250883	11.4332374921903	11.3840686165951	11.8590472373111
RNF7	12.1507773787269	12.3757872935941	12.3552126441951	11.7200360616017	11.6193039757575	12.8631480222786	12.5456820353895	12.684572387439	11.2081123302033	11.6753713297931	11.8348974969066	11.9418651570885
TNFRSF6B|RTEL1-TNFRSF6B	11.2165481911907	11.5219336245443	12.0429524105653	12.1889407004719	12.357991835572	12.8032316181196	12.6725702490791	13.1793978854052	11.910592185794	11.8918974028492	12.4755	12.6327516145901
VPS29	12.3631152270844	12.5116202206363	12.0780909089561	12.4410294281166	11.5543611185849	12.3080697794048	12.147246377975	11.6750832478443	10.4917733261129	10.8961692891588	11.1017262620291	11.3359971483257
TAOK3	12.4689123563612	12.7406803489703	12.401093807292	12.6901647871434	12.2491924369196	11.9841117157082	12.316434767241	11.7351786357644	10.9304347485885	11.1995197141035	11.2222273968101	11.366364110813
MINK1	13.0898579173936	12.8198001795122	13.5762504496818	12.0658116542403	11.3379646251084	12.718610420342	11.8104565061358	11.9325279902551	10.9189269305566	11.0422507857628	10.7487224521145	11.5509167537003
ERGIC3	12.4416046878713	12.4628319710017	12.0051233961391	12.1942856452246	11.9370777187693	12.0914526202113	12.9263232437414	12.3698846473442	11.714393683855	11.7428141588241	11.5665	12.0774835000608
BIRC2	12.3214870522423	12.3324997422336	12.6983339359243	12.0958234360506	11.0805040037708	12.1810216267829	12.4529172938176	12.7605002511074	11.2689459977562	11.1991	11.8616317078697	11.717362375689
PPP1R2	11.220812245177	11.7627202798976	12.1364060591065	10.3242624211777	10.3348584057694	13.2030788693656	12.9590349718132	13.1163360570991	11.8082713750538	12.1415209685289	12.7227970562265	12.666069688328
BLOC1S2	12.563210553206	12.7131325374408	11.6815538376764	12.6278523541161	11.2120105754067	12.7586823638977	11.951905120755	10.6014861019211	10.3666600636992	11.786728791934	11.7854381833634	12.1205093425731
[truncated: 18,264 more rows]

## Sheet: GSE15932
	GSM399694	GSM399697	GSM399699	GSM399704	GSM399705	GSM399706	GSM399707	GSM399708	GSM399717	GSM399718	GSM399719	GSM399761	GSM399762	GSM399763	GSM399765	GSM399766
[truncated: 22,880 more rows]

[truncated: 12 more sheets: GSE76826, GSE32280, GWAS Data Acquisition, Filter Tool Variable, Exposure factors, dat, exposure, gene, heterogeneity, id, pleiotropy, steiger]
